# Supplementary material for: Direct arene trifluoromethylation enabled by promiscuous activity of fungal laccase
Source: Royal Society of Chemistry journal article supplement (doi:10.1039/d3ob01779f), 2023-01-01
Supplement: d3ob01779f1.pdf [file d3ob01779f1.pdf]

Supplementary Materials for

## Direct Arene Trifluoromethylation Enabled by Promiscuous Activity of Fungal Laccase

Yi Ling Goh,<sup>†a</sup> Shi Yang Long,<sup>†a</sup> Mun Fei Wong,<sup>a</sup> Lee Ling Tan,<sup>b</sup> Elaine Tiong,<sup>b</sup>

Fong Tian Wong,<sup>b</sup> Zhennan Liu<sup>\*a</sup>

---

<sup>a</sup>Institute of Sustainability for Chemicals, Energy and Environment (ISCE2), Agency for Science, Technology and Research (A\*STAR), 8 Biomedical Grove, Neuros #07-01, Singapore 138665, Republic of Singapore.

<sup>b</sup>Institute of Molecular and Cell Biology (IMCB), Agency for Science, Technology and Research (A\*STAR), 61 Biopolis Drive, Proteos #07-01, Singapore 138673, Republic of Singapore.

<sup>†</sup> These authors contributed equally to this work.

|                                                                                      |             |
|--------------------------------------------------------------------------------------|-------------|
| <b>I. Materials and Methods</b>                                                      | pages 2-8   |
| 1. General Methods                                                                   |             |
| 2. General procedure for laccase-catalyzed trifluoromethylation in analytical scale  |             |
| 3. General procedure for laccase-catalyzed trifluoromethylation in preparative scale |             |
| 4. Preparation of laccase sample for ICP-MS analysis                                 |             |
| 5. Kinetic isotope experiments                                                       |             |
| <b>II. Supplementary figures and tables</b>                                          | pages 9-13  |
| Fig. S1 to S8                                                                        |             |
| Table S1                                                                             |             |
| <b>NMR Spectra</b>                                                                   | pages 14-49 |
| <b>References</b>                                                                    | page 49     |

## I. Materials and Methods

### 1. General Methods

Unless otherwise noted, all chemicals, salts, and solvents were reagent grade and used as received from commercial suppliers without further purification. In particular, laccase from *Trametes versicolor* was purchased from Sigma Aldrich with a specific activity of 0.89 U/mg. The pH of buffers used was adjusted using Mettler Toledo SevenExcellence pH meter with InLab Expert Pro-ISM probe.  $^1\text{H}$  NMR,  $^{13}\text{C}$  NMR, and 2D NMR (nuclear magnetic resonance) spectra were acquired on Bruker AVANCE III 400 MHz with DCH CryoProbe.  $^{19}\text{F}$  NMR spectra were recorded on Bruker AVANCE NEO 400 MHz with RT iProbe. Chemical shifts are reported in parts per million (ppm) on the delta ( $\delta$ ) scale. Chemical shifts for  $^1\text{H}$  NMR were referenced to the residual protium in the NMR solvent ( $\text{CDCl}_3$ : 7.26 ppm;  $\text{CD}_2\text{Cl}_2$ : 5.32;  $\text{CD}_3\text{OD}$ : 3.31 ppm). Chemical shifts for  $^{13}\text{C}$  NMR were referenced to the carbon resonance of the NMR solvent ( $\text{CDCl}_3$ : 77.16 ppm;  $\text{CD}_3\text{OD}$ : 49.0 ppm). NMR spectra were processed using MestReNova 12.0.2. Data is presented as follows: chemical shift, multiplicity (s = singlet, d = doublet, t = triplet, q = quartet, hept = heptet, m = multiplet), integration and coupling constants ( $J$ ) in Hertz (Hz). Analytical thin layer chromatography (TLC) was performed using Merck 60 F254, 0.25  $\mu\text{m}$  silica gel plates and spots were visualized by UV and/or potassium permanganate, or ceric ammonium molybdate stain. Flash column chromatography was carried out using Merck 60 F254, 0.040-0.063  $\mu\text{m}$  silica gel. Preparative TLC chromatography was carried out using Merck 60 F254, 0.25  $\mu\text{m}$  silica gel plates. High resolution electrospray ionization (HRMS-ESI) mass spectra were recorded using Agilent 6545B Time-of-Flight (TOF) mass spectrometer. GC-MS (gas chromatography–mass spectrometry) analyses were obtained on an Agilent 7890A GC equipped with Agilent 5975C Inert XL MSD with Triple-Axis Detector and HP-5ms Ultra Inert column (30 m x 0.25 mm ID x 0.25  $\mu\text{m}$ ). GC-FID (gas chromatography-flame ionization detector) analyses were obtained on an Agilent 8890 GC equipped with an FID detector and CycloSil-B column (30 m x 0.25 mm ID x 0.25  $\mu\text{m}$ ). ICP-MS (inductively coupled plasma–mass spectrometry) analyses were performed with PerkinElmer's NexION 2000C ICP Mass Spectrometer. Names of structures were generated using ChemBioDraw Ultra 21.0.0.28.

### 2. General procedure for laccase-catalyzed trifluoromethylation in analytical scale

The laccase (4 U) from commercial supplier was dissolved in sodium phosphate buffer (400  $\mu\text{L}$ , 100 mM, pH 7) prior to addition of a stock solution of substrate in DMSO (100  $\mu\text{L}$ , 0.2 M). A stock solution of  $\text{NaSO}_2\text{CF}_3$  (100  $\mu\text{L}$ , 1 M in  $\text{H}_2\text{O}$ , 5 equiv.) was then added, followed by aqueous  $t\text{BuOOH}$  solution (29  $\mu\text{L}$ , 70 wt.% in  $\text{H}_2\text{O}$ , 10 equiv.). The reactions were shaken on an orbital shaker at room temperature, 600 rpm. After 15 h, a saturated solution of sodium thiosulfate or sodium bicarbonate in water was added (100  $\mu\text{L}$ ) and the mixture was extracted with a solution of  $\text{CDCl}_3$  (1 mL, containing 0.02 mmol 2,2,2-trifluoroacetophenone as internal standard). The organic fraction was washed with water and brine, and dried over  $\text{Na}_2\text{SO}_4$ . The solution was filtered and analyzed by GC-MS,  $^{19}\text{F}$  NMR and/or  $^1\text{H}$  NMR.

### 3. General procedure for laccase-catalyzed trifluoromethylation in preparative scale (for characterization of new compounds)

Laccase from *Trametes versicolor* (200 U) was dissolved in 10 mL reaction buffer (100 mM NaPi at pH 7 or 250 mM NaOAc at pH 5.4). A solution of arene **1** (2.5 mL, 0.4 M in DMSO, 1 mmol) was added to the catalyst solution, followed by addition of stock solutions of NaSO<sub>2</sub>CF<sub>3</sub> (2.5 equiv., 2 M in respective buffer) and *t*BuOOH (5 equiv., 70 wt.% in H<sub>2</sub>O). The mixture was shaken on an orbital shaker at 600 rpm at room temperature. After 4 h, a second batch of NaSO<sub>2</sub>CF<sub>3</sub> (2.5 equiv., 2 M in respective buffer) and *t*BuOOH (5 equiv., 70 wt.% in H<sub>2</sub>O) was added and the reaction shaken overnight for another 12 h. The reaction mixture was extracted thrice with diethyl ether (except for **1m** and **1n** - extracted with ethyl acetate). The combined organic fraction was washed twice with brine, dried over Na<sub>2</sub>SO<sub>4</sub>, filtered, and concentrated under reduced pressure (25 °C, 400 mbar). The crude residue was purified by silica gel flash chromatography and, if required, a second purification by silica gel flash chromatography or preparative TLC chromatography was performed to afford the desired trifluoromethylated product **3**. (Note: Volatile products should not be purified using preparative TLC chromatography.)

#### Product Characterization

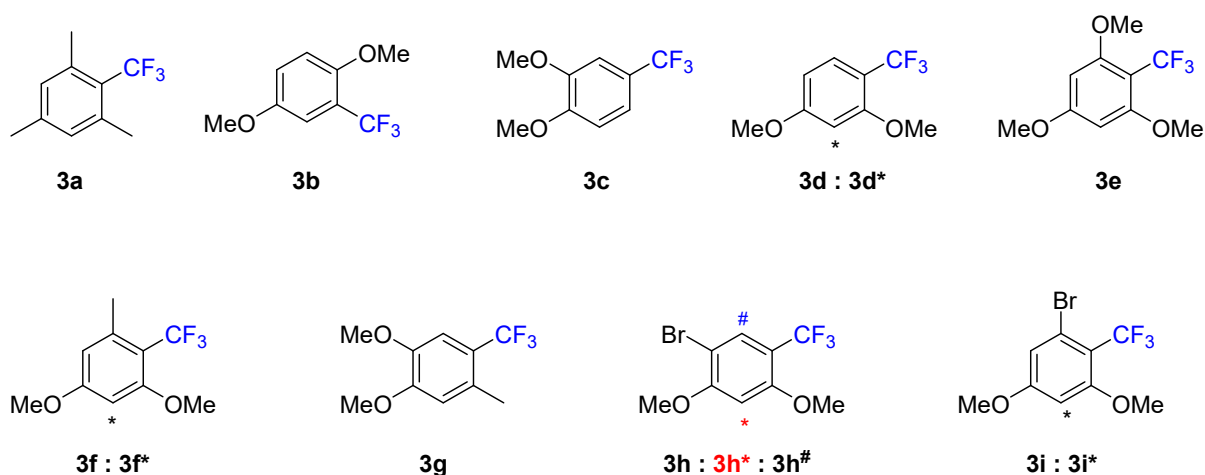

The NMR data for the products above matched those reported in the literature:

1,3,5-trimethyl-2-(trifluoromethyl)benzene (**3a**),<sup>1</sup> 1,4-dimethoxy-2-(trifluoromethyl)benzene (**3b**),<sup>2</sup> 1,2-dimethoxy-4-(trifluoromethyl)benzene (**3c**),<sup>2</sup> 2,4-dimethoxy-1-(trifluoromethyl)benzene (**3d**),<sup>2</sup> 1,3-dimethoxy-2-(trifluoromethyl)benzene (**3d\***),<sup>2</sup> 1,3,5-trimethoxy-2-(trifluoromethyl)benzene (**3e**),<sup>2</sup> 1,5-dimethoxy-3-methyl-2-(trifluoromethyl)benzene (**3f**),<sup>3</sup> 1,3-dimethoxy-5-methyl-2-(trifluoromethyl)benzene (**3f\***),<sup>3</sup> 1,2-dimethoxy-4-methyl-5-(trifluoromethyl)benzene (**3g**),<sup>4</sup> 1-bromo-2,4-dimethoxy-5-(trifluoromethyl)benzene (**3h**),<sup>2</sup> 2-bromo-1,5-dimethoxy-3-(trifluoromethyl)benzene (**3h\***),<sup>5</sup> 1-bromo-3,5-dimethoxy-2-(trifluoromethyl)benzene (**3i**),<sup>3</sup> 5-bromo-1,3-dimethoxy-2-(trifluoromethyl)benzene (**3i\***).<sup>3</sup>

#### Products from reaction of 1h

**1-bromo-2,4-dimethoxy-5-(trifluoromethyl)benzene : 1-bromo-2,4-dimethoxy-3-(trifluoromethyl)benzene : 2-bromo-1,5-dimethoxy-3-(trifluoromethyl)benzene (3h : 3h\* : 3h#)**

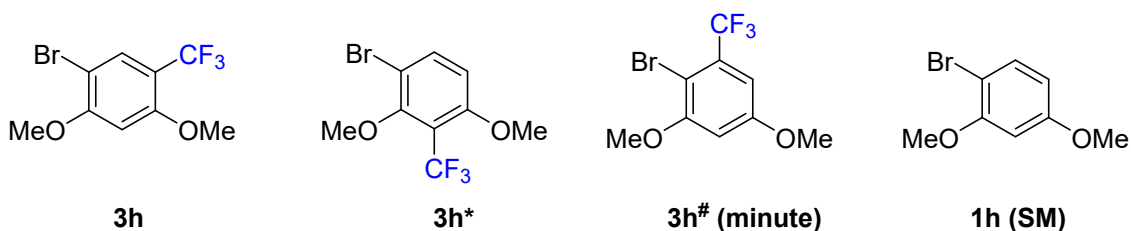

**3h\* : 3h# (minute) : 1h (SM) isolated as a mixture in ratio of 1 : 0.37 : 9**

**1-bromo-2,4-dimethoxy-5-(trifluoromethyl)benzene (3h)**

<sup>1</sup>H NMR (400 MHz, CDCl<sub>3</sub>) δ 6.52 (s, 1H), 6.52 (s, 1H), 3.95 (s, 3H), 3.92 (s, 3H).

<sup>13</sup>C NMR (101 MHz, CDCl<sub>3</sub>) δ 159.60, 158.52 (q, *J*<sub>C-F</sub> = 3.3, 1.5 Hz), 131.49 (q, *J*<sub>C-F</sub> = 5.4 Hz), 123.20 (q, *J*<sub>C-F</sub> = 271.6 Hz), 112.52 (q, *J*<sub>C-F</sub> = 31.9 Hz), 101.38, 96.97, 56.60, 56.40.

<sup>19</sup>F NMR (376 MHz, CDCl<sub>3</sub>) δ -61.5 (s, CF<sub>3</sub>).

HRMS (ESI-TOF) *m/z*: [M+H]<sup>+</sup> Calcd for C<sub>9</sub>H<sub>9</sub>BrF<sub>3</sub>O<sub>2</sub><sup>+</sup> 284.9733; Found 284.9730.

Characterization data were in agreement with literature.<sup>2</sup>

**1-bromo-2,4-dimethoxy-3-(trifluoromethyl)benzene (3h\*) : 2-bromo-1,5-dimethoxy-3-(trifluoromethyl)benzene (3h#)**

**3h\*** and **3h#** were formed in small amount at a ratio of 3.4 : 1 : 0.5 (**3h** : **3h\*** : **3h#**) in crude <sup>19</sup>F NMR and isolated as a mixture with starting material **1h** at a ratio of 1 : 0.37 : 9 (**3h\*** : **3h#** : **1h**) in <sup>1</sup>H NMR. Hence, no full characterization was obtained.

**3h\***: <sup>1</sup>H NMR deduced after matching against NMR data of **3h**, **3h#** and **1h**.

<sup>1</sup>H NMR (400 MHz, CDCl<sub>3</sub>) δ 7.63 (d, *J* = 0.6 Hz, 1H), 6.69 (d, *J* = 9.3 Hz, 1H), 3.87 (s, 2 x 3H).

<sup>19</sup>F NMR (376 MHz, CDCl<sub>3</sub>) δ -56.4 (s, CF<sub>3</sub>).

**3h#**: Characterization data were in agreement with patent.<sup>5</sup>

<sup>1</sup>H NMR (400 MHz, CDCl<sub>3</sub>) δ 6.84 (d, *J* = 2.8 Hz, 1H), 6.63 (d, *J* = 2.8 Hz, 1H), 3.91 (s, 3H), 3.84 (s, 3H).

<sup>19</sup>F NMR (376 MHz, CDCl<sub>3</sub>) δ -62.3 (s, CF<sub>3</sub>).

HRMS of **3h\*** : **3h#** : **1h** mixture: (ESI TOF) *m/z*: [M+H]<sup>+</sup> Calcd for C<sub>9</sub>H<sub>9</sub>BrF<sub>3</sub>O<sub>2</sub><sup>+</sup> *m/z* 284.9733; Found 284.9722.

**Products from reaction of 1j**

**2-isopropyl-5-methyl-4-(trifluoromethyl)phenol : 6-isopropyl-3-methyl-2-(trifluoromethyl)phenol (3j : 3j\*)**

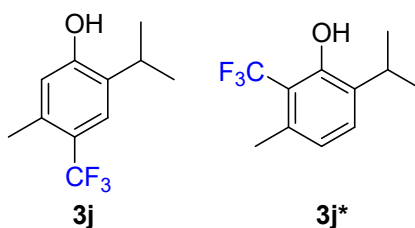

**2-isopropyl-5-methyl-4-(trifluoromethyl)phenol (3j)**

<sup>1</sup>H NMR (400 MHz, CDCl<sub>3</sub>) δ 7.40 (s, 1H), 6.63 (s, 1H), 5.08 (s, 1H), 3.17 (sept, *J* = 6.9 Hz, 1H), 2.38 (d, *J*<sub>H-F</sub> = 1.6 Hz, 3H), 1.26 (s, 3H), 1.24 (s, 3H).

$^{13}\text{C}$  NMR (101 MHz,  $\text{CDCl}_3$ )  $\delta$  155.1 (d,  $J_{\text{C-F}} = 1.0$  Hz), 135.8 (q,  $J_{\text{C-F}} = 1.8$  Hz), 131.7, 125.1 (q,  $J_{\text{C-F}} = 272.5$  Hz), 124.7 (q,  $J_{\text{C-F}} = 5.6$  Hz), 121.6 (q,  $J_{\text{C-F}} = 29.8$  Hz), 118.6, 26.9, 22.5, 19.0 (q,  $J_{\text{C-F}} = 2.1$  Hz).

$^{19}\text{F}$  NMR (376 MHz,  $\text{CDCl}_3$ )  $\delta$  -60.0 (s,  $\text{CF}_3$ ).

HRMS (ESI-TOF)  $m/z$ :  $[\text{M}+\text{H}]^+$  Calcd for  $\text{C}_{11}\text{H}_{14}\text{F}_3\text{O}^+$  219.0991; Found 219.0983.

HRMS (ESI-TOF)  $m/z$ :  $[\text{M}-\text{H}]^-$  Calcd for  $\text{C}_{11}\text{H}_{12}\text{F}_3\text{O}^-$  217.0846; Found 217.0841.

### 6-isopropyl-3-methyl-2-(trifluoromethyl)phenol (**3j\***)

$^1\text{H}$  NMR (400 MHz,  $\text{CDCl}_3$ )  $\delta$  7.22 (d,  $J = 7.8$  Hz, 1H), 6.78 (d,  $J = 7.8$  Hz, 1H), 6.09 (d,  $J = 7.1$  Hz, 1H), 3.28 (sept,  $J = 6.8$  Hz, 1H), 2.41 (q,  $J_{\text{H-F}} = 2.8$  Hz, 3H), 1.23 (s, 3H), 1.21 (s, 3H).

$^{13}\text{C}$  NMR (101 MHz,  $\text{CDCl}_3$ )  $\delta$  151.8 (q,  $J_{\text{C-F}} = 2.0$  Hz), 135.4 (q,  $J_{\text{C-F}} = 1.8$  Hz), 135.1, 129.5, 126.5 (q,  $J_{\text{C-F}} = 274.9$  Hz), 124.1, 113.9 (q,  $J_{\text{C-F}} = 26.4$  Hz), 26.8, 22.6, 20.7 (q,  $J_{\text{C-F}} = 3.6$  Hz).

$^{19}\text{F}$  NMR (376 MHz,  $\text{CDCl}_3$ )  $\delta$  -53.2 (s,  $\text{CF}_3$ ).

HRMS (ESI-TOF)  $m/z$ :  $[\text{M}-\text{H}]^-$  Calcd for  $\text{C}_{11}\text{H}_{12}\text{F}_3\text{O}^-$  217.0846; Found 217.0842.

### Products from reaction of **1k**

5-isopropyl-2-methyl-4-(trifluoromethyl)phenol : 3-isopropyl-6-methyl-2-(trifluoromethyl)phenol : 5-isopropyl-2-methyl-3-(trifluoromethyl)phenol (**3k** : **3k\*** : **3k#**)

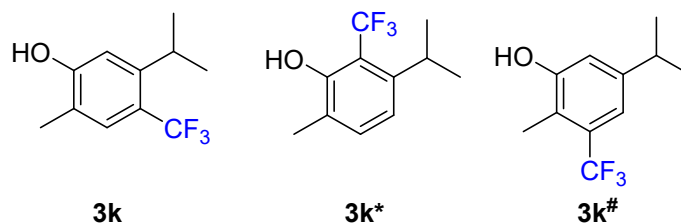

5-isopropyl-2-methyl-4-(trifluoromethyl)phenol (**3k**) : 5-isopropyl-2-methyl-3-(trifluoromethyl)phenol (**3k#**)

**3k#** was formed in small amount at a ratio of 1 : 0.74 : 0.33 (**3k** : **3k\*** : **3k#**) in crude  $^{19}\text{F}$  NMR. **3k** and **3k#** were isolated as a mixture at a ratio of 1 : 0.3 (**3k** : **3k#**) in  $^{19}\text{F}$  and  $^1\text{H}$  NMR.

**3k**:  $^1\text{H}$  NMR (400 MHz,  $\text{CDCl}_3$ )  $\delta$  7.35 (s, 1H), 6.82 (s, 1H), 3.34 – 2.90 ( $m_{\text{H-F}}$ , 1H), 2.23 (s, 3H), 1.23 (s, 3H), 1.22 (s, 3H).

$^{13}\text{C}$  NMR (101 MHz,  $\text{CDCl}_3$ )  $\delta$  156.64, 148.04, 128.68 (q,  $J_{\text{C-F}} = 5.9$  Hz), 125.03 (q,  $J_{\text{C-F}} = 272.7$  Hz), 121.04, 120.15 (q,  $J_{\text{C-F}} = 29.5$  Hz), 113.62, 29.13 (q,  $J_{\text{C-F}} = 2.1$  Hz), 24.39, 23.90, 15.36.

$^{19}\text{F}$  NMR (376 MHz,  $\text{CDCl}_3$ )  $\delta$  -57.7 (s,  $\text{CF}_3$ ).

**3k#**:  $^1\text{H}$  NMR (400 MHz,  $\text{CDCl}_3$ )  $\delta$  7.08 (d,  $J_{\text{H-F}} = 1.8$  Hz, 1H), 6.82 (s, 1H), 2.86 (sept,  $J = 6.9$  Hz, 1H), 2.30 (q,  $J_{\text{H-F}} = 1.6$  Hz, 3H), 1.24 (s, 3H), 1.22 (s, 3H).

$^{13}\text{C}$  NMR (101 MHz,  $\text{CDCl}_3$ )  $\delta$  154.58, 147.94, 130.25 (q,  $J_{\text{C-F}} = 29.2$  Hz), 124.63 (q,  $J_{\text{C-F}} = 274.8$  Hz), 120.15 (q,  $J_{\text{C-F}} = 29.5$  Hz), 116.61 (q,  $J_{\text{C-F}} = 5.56$  Hz), 116.56, 33.85, 24.39, 23.90, 11.25 (q,  $J_{\text{C-F}} = 2.1$  Hz).

$^{19}\text{F}$  NMR (376 MHz,  $\text{CDCl}_3$ )  $\delta$  -60.5 (s,  $\text{CF}_3$ ).

HRMS of **3k** : **3k#** mixture:

HRMS (ESI-TOF)  $m/z$ :  $[\text{M}+\text{H}]^+$  Calcd for  $\text{C}_{11}\text{H}_{14}\text{F}_3\text{O}^+$  219.0991; Found 219.0984.

HRMS (ESI-TOF)  $m/z$ :  $[\text{M}-\text{H}]^-$  Calcd for  $\text{C}_{11}\text{H}_{12}\text{F}_3\text{O}^-$  217.0846; Found 217.0847.

### 3-isopropyl-6-methyl-2-(trifluoromethyl)phenol (**3k\***)

$^1\text{H}$  NMR (400 MHz,  $\text{CDCl}_3$ )  $\delta$  7.23 (d,  $J = 8.2$  Hz, 1H), 6.92 (d,  $J = 7.9$  Hz, 1H), 6.21 (q,  $J = 7.1$  Hz, 1H), 3.36 – 3.14 ( $m_{\text{H-F}}$ , 1H), 2.22 (s, 3H), 1.23 (s, 3H), 1.22 (s, 3H).

$^{13}\text{C}$  NMR (101 MHz,  $\text{CDCl}_3$ )  $\delta$  152.02 (q,  $J_{\text{C-F}} = 2.0$  Hz), 147.72 (q,  $J_{\text{C-F}} = 1.6$  Hz), 134.16, 126.59 (q,  $J_{\text{C-F}} = 275.3$  Hz), 124.52, 118.79, 112.44 (q,  $J_{\text{C-F}} = 26.0$  Hz), 29.60 (q,  $J_{\text{C-F}} = 3.3$  Hz), 24.67, 16.21.

$^{19}\text{F}$  NMR (376 MHz,  $\text{CDCl}_3$ )  $\delta$  -50.7 (s,  $\text{CF}_3$ ).

HRMS (ESI-TOF)  $m/z$ :  $[\text{M}+\text{H}]^+$  Calcd for  $\text{C}_{11}\text{H}_{14}\text{F}_3\text{O}^+$  219.0991; Found 219.0996.

HRMS (ESI-TOF)  $m/z$ :  $[\text{M}-\text{H}]^-$  Calcd for  $\text{C}_{11}\text{H}_{12}\text{F}_3\text{O}^-$  217.0846; Found 217.0843.

### Products from reaction of 1l

**4-(butoxymethyl)-2-methoxy-5-(trifluoromethyl)phenol : 4-(butoxymethyl)-2-methoxy-6-(trifluoromethyl)phenol : 4-(butoxymethyl)-6-methoxy-2,3-bis(trifluoromethyl)phenol (3l : 3l\* : 3l^)**

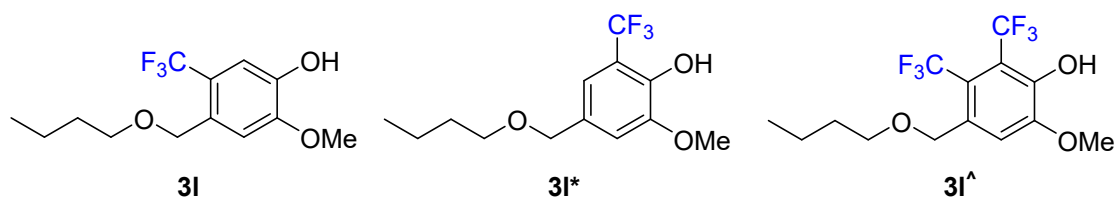

### 4-(butoxymethyl)-2-methoxy-5-(trifluoromethyl)phenol (3l)

**3l:**  $^1\text{H}$  NMR (400 MHz,  $\text{CDCl}_3$ )  $\delta$  7.18 (s, 1H), 7.16 (s, 1H), 4.59 (s, 2H), 3.95 (s, 3H), 3.51 (t,  $J = 6.5$  Hz, 2H), 1.67 – 1.60 ( $m_{\text{H-F}}$ , 2H), 1.47 – 1.36 ( $m_{\text{H-F}}$ , 2H), 0.94 (t,  $J = 7.4$  Hz, 3H).

$^{13}\text{C}$  NMR (101 MHz,  $\text{CDCl}_3$ )  $\delta$  148.89, 144.32, 130.30 (q,  $J_{\text{C-F}} = 1.5$  Hz), 124.42 (q,  $J_{\text{C-F}} = 273.0$  Hz), 120.60 (q,  $J_{\text{C-F}} = 31.4$  Hz), 112.43 (q,  $J_{\text{C-F}} = 5.8$  Hz), 111.11, 70.72, 68.52 (q,  $J_{\text{C-F}} = 2.7$  Hz), 56.19, 31.95, 19.57, 14.08.

$^{19}\text{F}$  NMR (376 MHz,  $\text{CDCl}_3$ )  $\delta$  -58.7 (s,  $\text{CF}_3$ ).

HRMS (ESI-TOF)  $m/z$ :  $[\text{M}+\text{H}]^+$  Calcd for  $\text{C}_{13}\text{H}_{18}\text{F}_3\text{O}_3^+$  279.1203; Found 279.1179.

HRMS (ESI-TOF)  $m/z$ :  $[\text{M}-\text{H}]^-$  Calcd for  $\text{C}_{13}\text{H}_{16}\text{F}_3\text{O}_3^-$  277.1057; Found 277.1052.

### 4-(butoxymethyl)-2-methoxy-6-(trifluoromethyl)phenol (3l\*): 4-(butoxymethyl)-6-methoxy-2,3-bis(trifluoromethyl)phenol (3l^)

**3l^** was formed in small amount at a ratio of 1 : 1.1 : 0.05 (**3l** : **3l\*** : **3l^**) in crude  $^{19}\text{F}$  NMR. **3l\*** and **3l^** were isolated as a mixture at a ratio of 1 : 0.2 (**3l\*** : **3l^**) in  $^{19}\text{F}$  and  $^1\text{H}$  NMR.  $^{13}\text{C}$  NMR data is not available for **3l^** because the signals are weak and many of the peaks are buried under those of **3l\***.

**3l\*:**  $^1\text{H}$  NMR (400 MHz,  $\text{CDCl}_3$ )  $\delta$  7.08 (s, 1H), 7.04 (s, 1H), 6.09 (s, 1H), 4.43 (s, 2H), 3.94 (s, 3H), 3.46 (t,  $J = 6.6$  Hz, 2H), 1.60 – 1.52 (m, 2H), 1.46 – 1.34 (m, 2H), 0.92 (t,  $J = 7.4$  Hz, 3H).

$^{13}\text{C}$  NMR (101 MHz,  $\text{CDCl}_3$ )  $\delta$  147.23, 143.72 (q,  $J_{\text{C-F}} = 3.9, 1.7$  Hz), 130.35, 123.65 (q,  $J_{\text{C-F}} = 272.6$  Hz), 117.64 (q,  $J_{\text{C-F}} = 4.9$  Hz), 115.87 (q,  $J_{\text{C-F}} = 31.6$  Hz), 113.23, 72.48, 70.42, 56.54, 31.92, 19.52, 14.06.

$^{19}\text{F}$  NMR (376 MHz,  $\text{CDCl}_3$ )  $\delta$  -62.0 (s,  $\text{CF}_3$ ).

HRMS (ESI-TOF)  $m/z$ :  $[\text{M}-\text{H}]^-$  Calcd for  $\text{C}_{13}\text{H}_{16}\text{F}_3\text{O}_3^-$  277.1057; Found 277.1051.

**3l^:**  $^1\text{H}$  NMR (400 MHz,  $\text{CDCl}_3$ )  $\delta$  7.36 (s, 1H), 6. (s, 1H), 4.61 (s, 2H), 4.0 (s, 3H), 3.50 (t,  $J = 6.0$  Hz, 2H), 1.60 – 1.52 (m, 2H), 1.46 – 1.33 (m, 2H), 0.92 (t,  $J = 7.4$  Hz, 3H).

$^{19}\text{F}$  NMR (376 MHz,  $\text{CDCl}_3$ )  $\delta$  -52.04 (q,  $J = 16.1$  Hz), -55.18 (q,  $J = 16.1$  Hz).

HRMS (ESI-TOF)  $m/z$ :  $[M-H]^-$  Calcd for  $C_{14}H_{15}F_6O_3^-$  345.0931; Found 345.0923.

### Products from reaction of 1m

**2-hydroxy-4-methoxy-3-(trifluoromethyl)benzoic acid** : **2-hydroxy-4-methoxy-5-(trifluoromethyl)benzoic acid**  
**acid** : **2-hydroxy-4-methoxy-3,5-bis(trifluoromethyl)benzoic acid (3m : 3m\* : 3m^)**

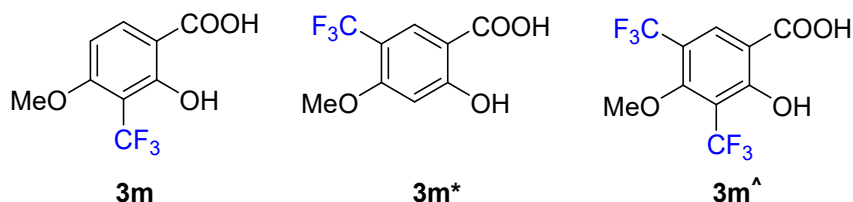

#### **2-hydroxy-4-methoxy-3-(trifluoromethyl)benzoic acid (3m)**

$^1H$  NMR (400 MHz,  $CD_3OD$ )  $\delta$  8.07 (d,  $J = 9.0$  Hz, 1H), 6.71 (d,  $J = 9.0$  Hz, 1H), 3.93 (s, 3H).

$^{13}C$  NMR (101 MHz,  $CD_3OD$ )  $\delta$  173.37, 165.20, 163.43, 136.72, 125.15 (q,  $J_{C-F} = 273.9$  Hz), 107.78, 106.53 (q,  $J_{C-F} = 30.2$  Hz), 103.95, 56.97.

$^{19}F$  NMR (376 MHz,  $CD_3OD$ )  $\delta$  -56.9 (s,  $CF_3$ ).

HRMS (ESI-TOF)  $m/z$ :  $[M+H]^+$  Calcd for  $C_9H_8F_3O_4^+$  237.0369; Found 237.0362.

HRMS (ESI-TOF)  $m/z$ :  $[M-H]^-$  Calcd for  $C_9H_6F_3O_4^-$  235.0224; Found 235.0230.

#### **2-hydroxy-4-methoxy-5-(trifluoromethyl)benzoic acid (3m\*)**

$^1H$  NMR (400 MHz,  $CD_3OD$ )  $\delta$  8.03 (s, 1H), 6.66 (s, 1H), 3.93 (s, 3H).

$^{13}C$  NMR (101 MHz,  $CD_3OD$ )  $\delta$  172.62, 168.20, 164.35, 130.83 (q,  $J_{C-F} = 5.5$  Hz), 124.81 (q,  $J_{C-F} = 270.2$  Hz), 111.67 (q,  $J_{C-F} = 32.0$  Hz), 106.08, 101.37, 56.88.

$^{19}F$  NMR (376 MHz,  $CD_3OD$ )  $\delta$  -63.2 (s,  $CF_3$ ).

HRMS (ESI-TOF)  $m/z$ :  $[M+H]^+$  Calcd for  $C_9H_8F_3O_4^+$  237.0369; Found 237.0362.

HRMS (ESI-TOF)  $m/z$ :  $[M-H]^-$  Calcd for  $C_9H_6F_3O_4^-$  235.0224; Found 235.0225.

#### **2-hydroxy-4-methoxy-3,5-bis(trifluoromethyl)benzoic acid (3m^)**

**3m^** was formed in small amount at a ratio of 1.2 : 1 : 0.24 (**3m** : **3m\*** : **3m^**) in crude  $^{19}F$  NMR. **3m^** was isolated as a mixture at a ratio of 1 : 0.13 (**3m** : **3m^**) in  $^{19}F$  and  $^1H$  NMR.  $^{13}C$  NMR data is not available for **3m^** because the signals are weak and many of the peaks are buried under those of **3m**.

$^1H$  NMR (400 MHz,  $CD_3OD$ )  $\delta$  8.32 (s, 1H), 3.88 (s, 3H).

$^{19}F$  NMR (376 MHz,  $CD_3OD$ )  $\delta$  -58.9 (s,  $CF_3$ ), -61.7 (s,  $CF_3$ ).

HRMS (ESI-TOF)  $m/z$ :  $[M+H]^+$  Calcd for  $C_{10}H_7F_6O_4^+$  305.0243; Found 305.0259.

HRMS (ESI-TOF)  $m/z$ :  $[M-H]^-$  Calcd for  $C_{10}H_5F_6O_4^-$  303.0098; Found 303.0089.

### Products from reaction of 1n

**4,6-dimethoxy-2-methyl-3-(trifluoromethyl)benzoic acid (3n)**



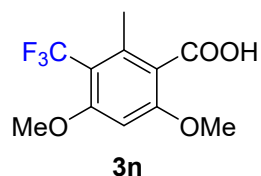

$^1\text{H}$  NMR (400 MHz,  $\text{CD}_3\text{OD}$ )  $\delta$  6.67 (s, 1H), 3.92 (s, 3H), 3.91 (s, 3H), 2.35 (q,  $J_{\text{H-F}} = 3.2$  Hz, 3H).

$^{13}\text{C}$  NMR (101 MHz,  $\text{CD}_3\text{OD}$ )  $\delta$  171.57, 162.01 (q,  $J_{\text{C-F}} = 1.6$  Hz), 160.54, 136.91 (q,  $J_{\text{C-F}} = 1.3$  Hz), 126.53 (q,  $J_{\text{C-F}} = 273.6$  Hz), 121.24, 110.85 (q,  $J_{\text{C-F}} = 29.5$  Hz), 95.45, 56.87, 56.52, 17.89 (q,  $J_{\text{C-F}} = 4.6$  Hz).

$^{19}\text{F}$  NMR (376 MHz,  $\text{CD}_3\text{OD}$ )  $\delta$  -54.4 (s,  $\text{CF}_3$ ).

HRMS (ESI-TOF)  $m/z$ :  $[\text{M}+\text{H}]^+$  Calcd for  $\text{C}_{11}\text{H}_{12}\text{F}_3\text{O}_4^+$  265.0682; Found 265.0676.

HRMS (ESI-TOF)  $m/z$ :  $[\text{M}-\text{H}]^-$  Calcd for  $\text{C}_{11}\text{H}_{10}\text{F}_3\text{O}_4^-$  263.0537; Found 263.058.

#### 4. Preparation of laccase sample for ICP-MS analysis

A solution of laccase from *Trametes versicolor* (0.89 U/mg, Sigma Aldrich) was prepared in 100 mM NaPi buffer (pH 7) with a concentration of 10 U/mL. 1 mL of laccase solution was digested with 0.5 mL conc. nitric acid (70%,  $\geq 99.999\%$  trace metals basis, Sigma Aldrich). The digested solution was diluted to 25 mL with ultrapure water and analyzed by ICP-MS. The calibration curve of Cu is shown in Fig. S6 and the data from triplicate ICP-MS measurements are listed in Table S1.

#### 5. Kinetic isotope experiment

In kinetic isotope experiment, deuterated analog **1e-D** was prepared following the procedure reported in the literature.<sup>6</sup> This method gave **1e-D** in 99% deuteration (Fig. S7). The crude NMR of KIE experiment using equal amounts of **1e** and **1e-D** shows the formation of isotopic products at a ratio of approximately 1:1 (Fig. S8).

## II. Supplementary figures and tables

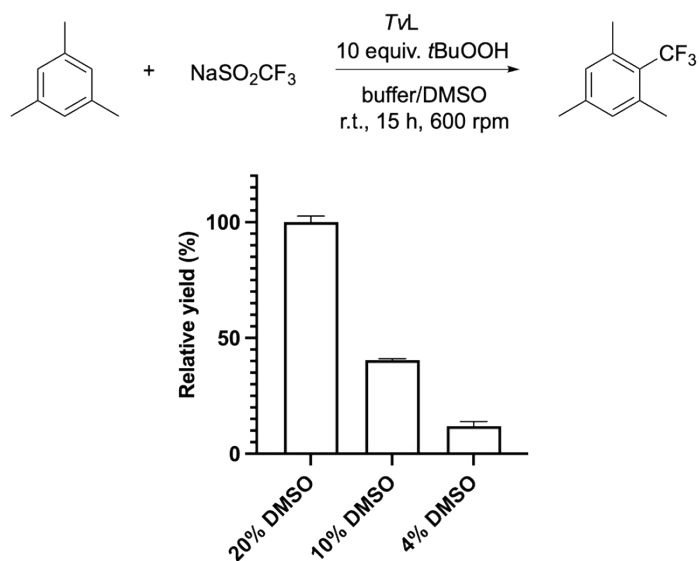

**Figure S1.** Effect of the percentage of DMSO co-solvent on the yield of TvL-catalyzed trifluoromethylation of mesitylene. Reaction conditions: mesitylene (0.02 mmol),  $\text{NaSO}_2\text{CF}_3$  (5 equiv.),  $t\text{BuOOH}$  (10 equiv.), laccase (4 U), x vol.-% DMSO, NaPi buffer (100 mM, pH 7), 25 °C, 600 rpm, 15 h. The relative yields were determined by GC-FID analysis of the crude reaction mixture with 2,2,2-trifluoroacetophenone as internal standard and the yield of the reaction under standard conditions (20 vol.-% DMSO) was normalized as 100%. Data shown are the average from three replicates, with error bars indicating 1 standard deviation.

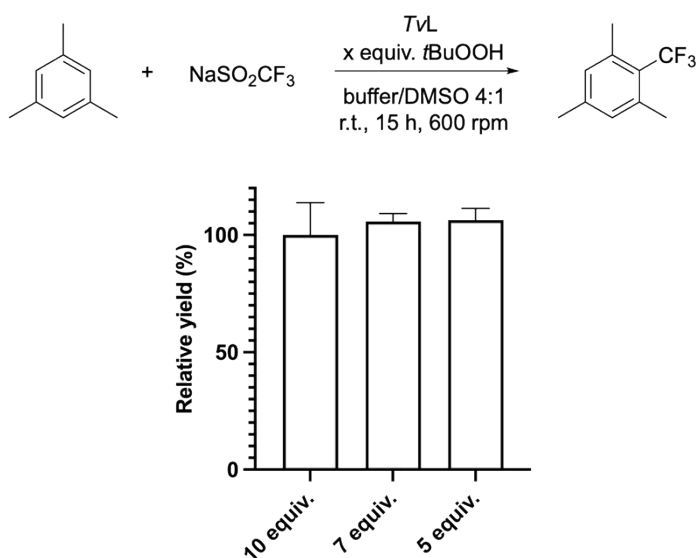

**Figure S2.** Effect of the equivalents of  $t\text{BuOOH}$  on the yield of TvL-catalyzed trifluoromethylation of mesitylene. Reaction conditions: mesitylene (0.02 mmol),  $\text{NaSO}_2\text{CF}_3$  (5 equiv.),  $t\text{BuOOH}$  (x equiv.), laccase (4 U), 20 vol.-% DMSO, NaPi buffer (100 mM, pH 7), 25 °C, 600 rpm, 15 h. The relative yields were determined by GC-FID analysis of the crude reaction mixture with 2,2,2-trifluoroacetophenone as internal standard and the yield of the reaction under standard conditions (10 equiv.  $t\text{BuOOH}$ ) was

normalized as 100%. Data shown are the average from three replicates, with error bars indicating 1 standard deviation.

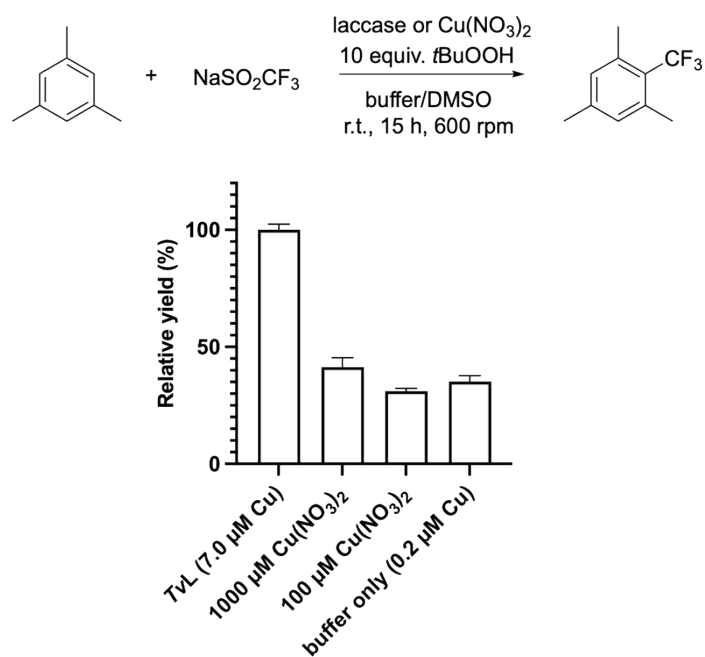

**Figure S3.** Trifluoromethylation of mesitylene catalyzed by TvL and different concentrations of Cu(NO<sub>3</sub>)<sub>2</sub>. Reaction conditions: mesitylene (0.02 mmol), NaSO<sub>2</sub>CF<sub>3</sub> (5 equiv.), tBuOOH (10 equiv.), laccase (4 U), 20 vol.-% DMSO, NaPi buffer (100 mM, pH 7), 25 °C, 600 rpm, 15 h. For reactions catalyzed by Cu(NO<sub>3</sub>)<sub>2</sub>, ultrapure water was used as the solvent as copper phosphate is marginally soluble in water. The relative yields were determined by GC-FID analysis of the crude reaction mixture with 2,2,2-trifluoroacetophenone as internal standard and the yield of the reaction catalyzed by laccase was normalized as 100%. Data shown are the average from three replicates, with error bars indicating 1 standard deviation.

(a) Radical scavenger effect:

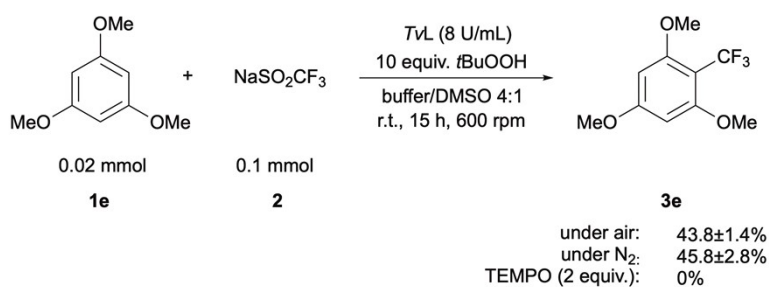

(b) Kinetic isotope effect:

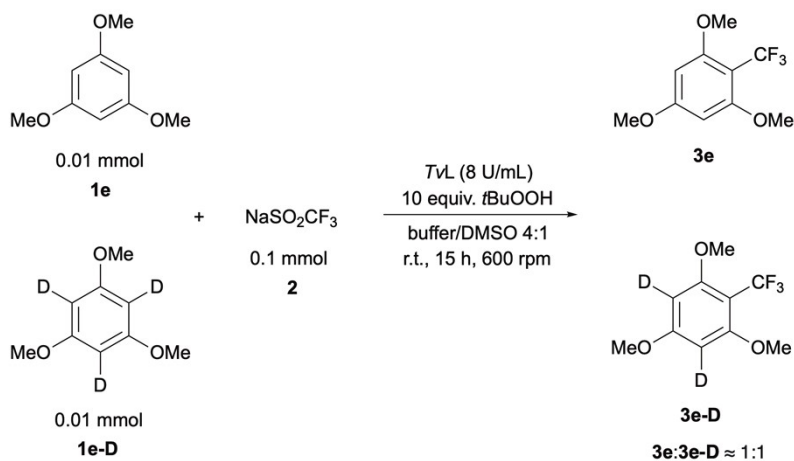

Figure S4. Mechanistic experiments.

Background reaction:

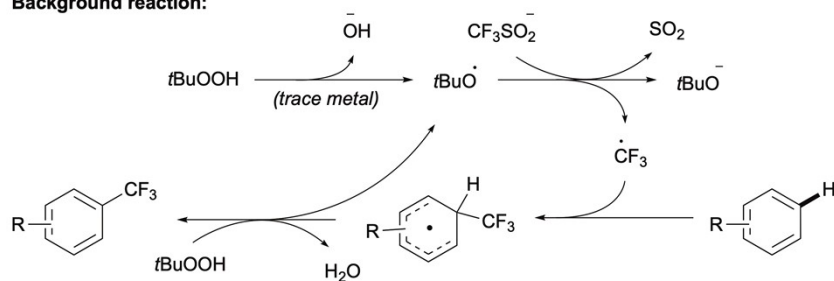

TvL-catalyzed reaction:

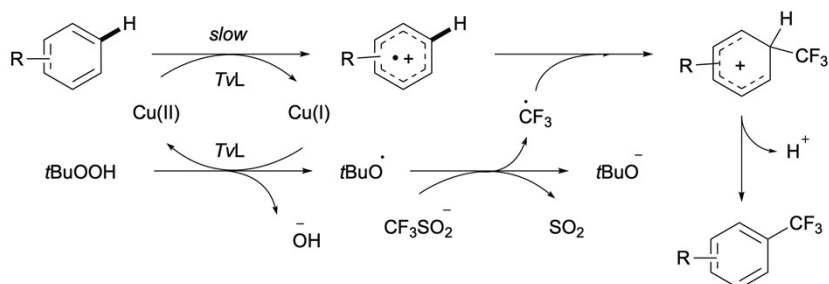

Figure S5. Proposed mechanism of laccase-catalyzed trifluoromethylation of arenes.

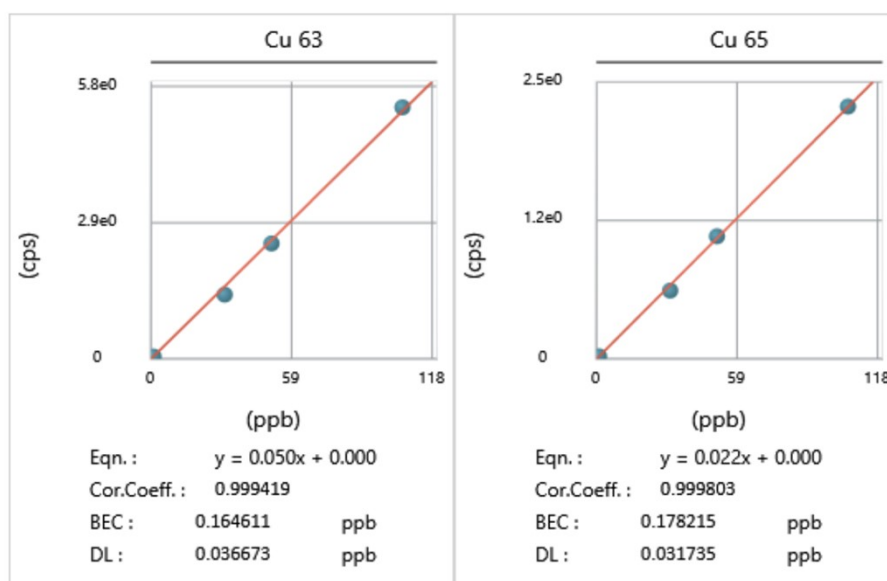

Figure S6. Calibration curve for ICP-MS quantification of copper.

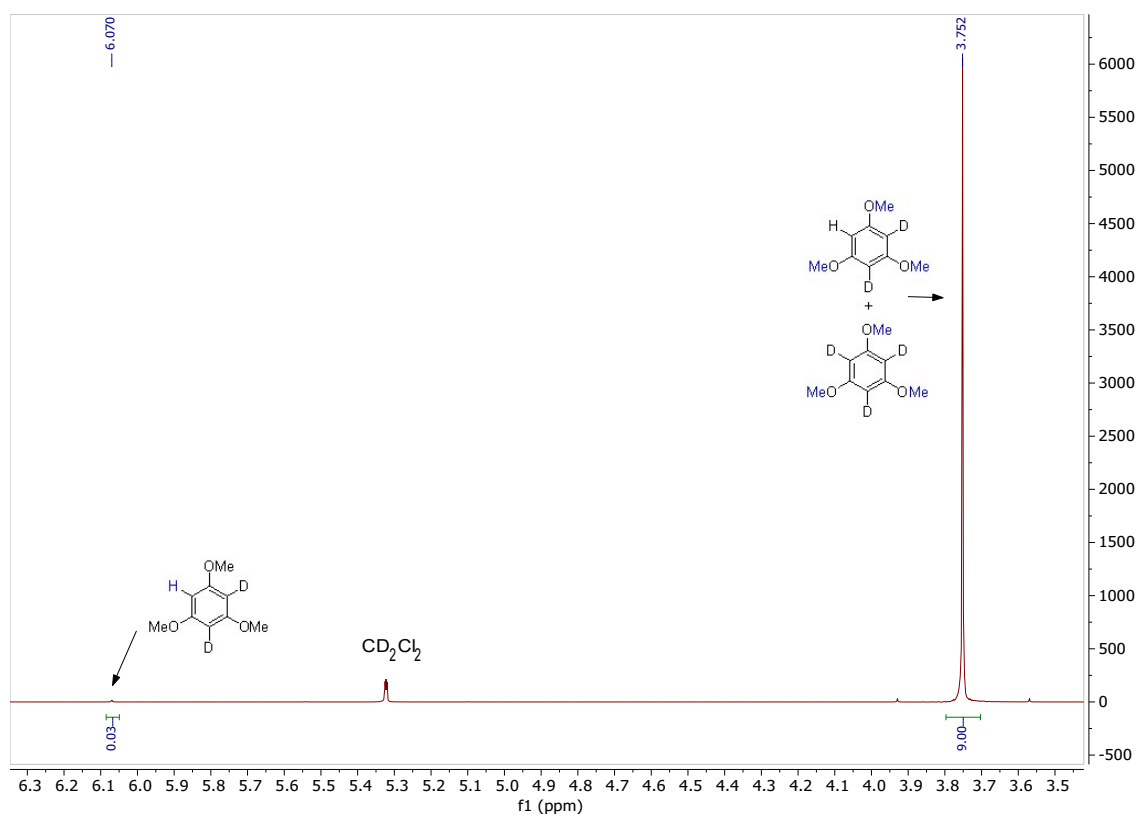

Figure S7. <sup>1</sup>H NMR of isolated 1e-D.

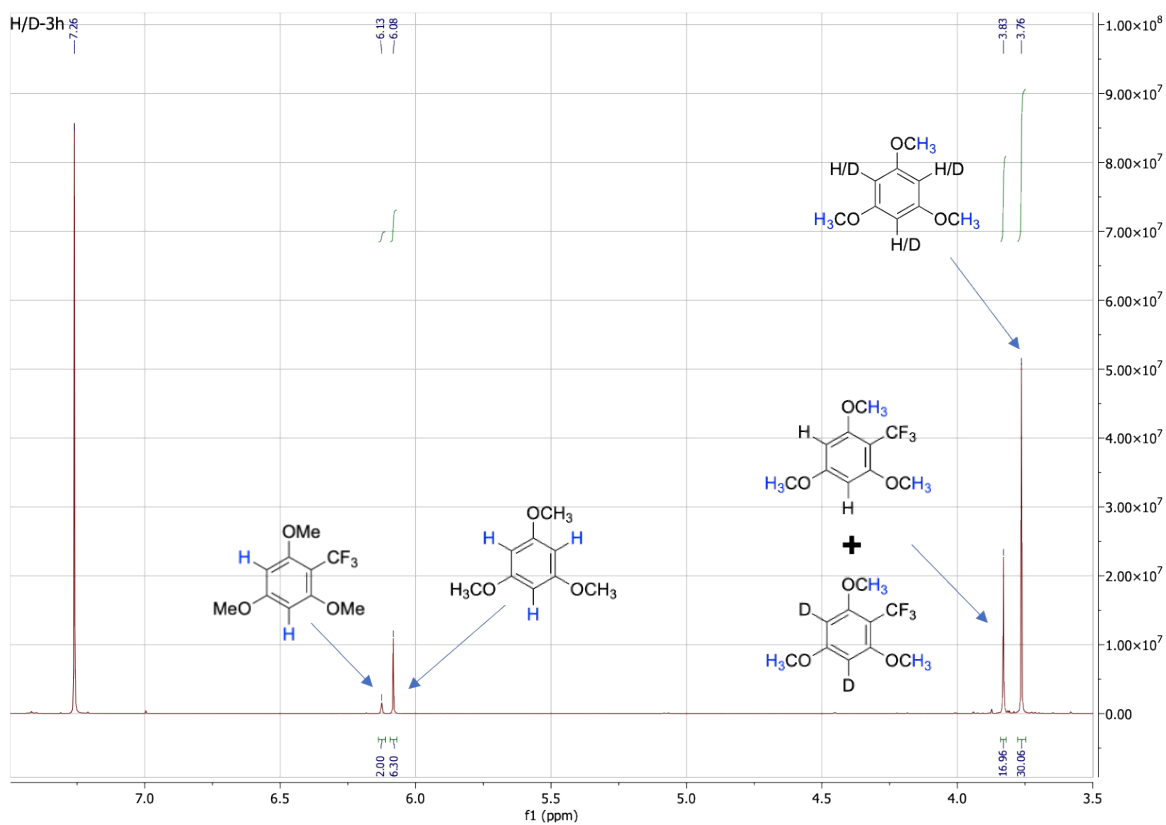

**Figure S8.**  $^1\text{H}$  NMR of crude reaction mixture of **1e** and **1e-D**.

**Table S1.** The copper concentration in ultrapure water, NaPi buffer and laccase sample solutions measured by ICP-MS.

|                                | Cu 63 (ppb)<br>Ammonia DRC |
|--------------------------------|----------------------------|
| Control (H <sub>2</sub> O)     | 1.305                      |
| 100 mM NaPi buffer             | 1.806                      |
| Sample 1 (laccase)             | 19.967                     |
| Sample 2 (laccase)             | 20.473                     |
| Sample 3 (laccase)             | 16.882                     |
| Average [Cu] in laccase sample | 17.30±1.94                 |

# <sup>1</sup>H NMR, <sup>13</sup>C NMR, HSQC, HMBC and <sup>19</sup>F NMR Spectra

## 1-bromo-2,4-dimethoxy-5-(trifluoromethyl)benzene (3h), <sup>1</sup>H NMR (400 MHz, CDCl<sub>3</sub>)

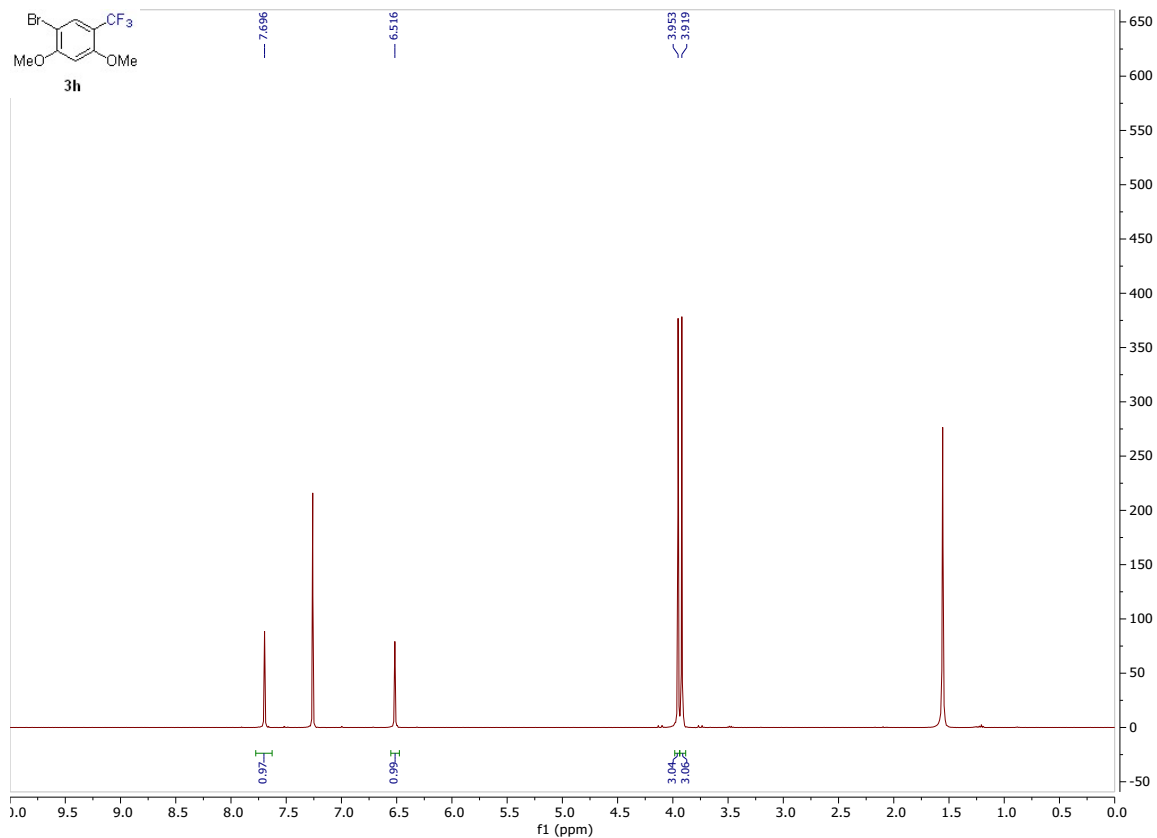

## 1-bromo-2,4-dimethoxy-5-(trifluoromethyl)benzene (3h), <sup>13</sup>C NMR (101 MHz, CDCl<sub>3</sub>)

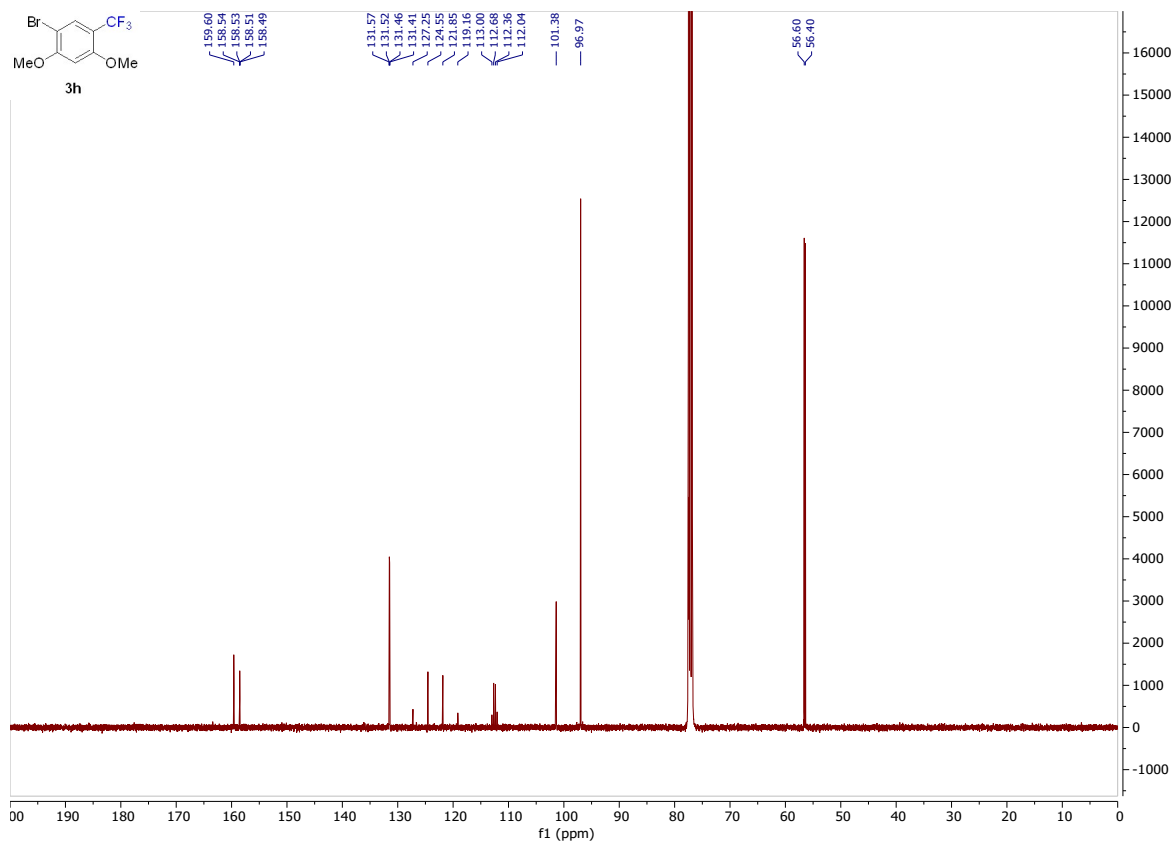

1-bromo-2,4-dimethoxy-5-(trifluoromethyl)benzene (3h), HSQC (CDCl<sub>3</sub>)

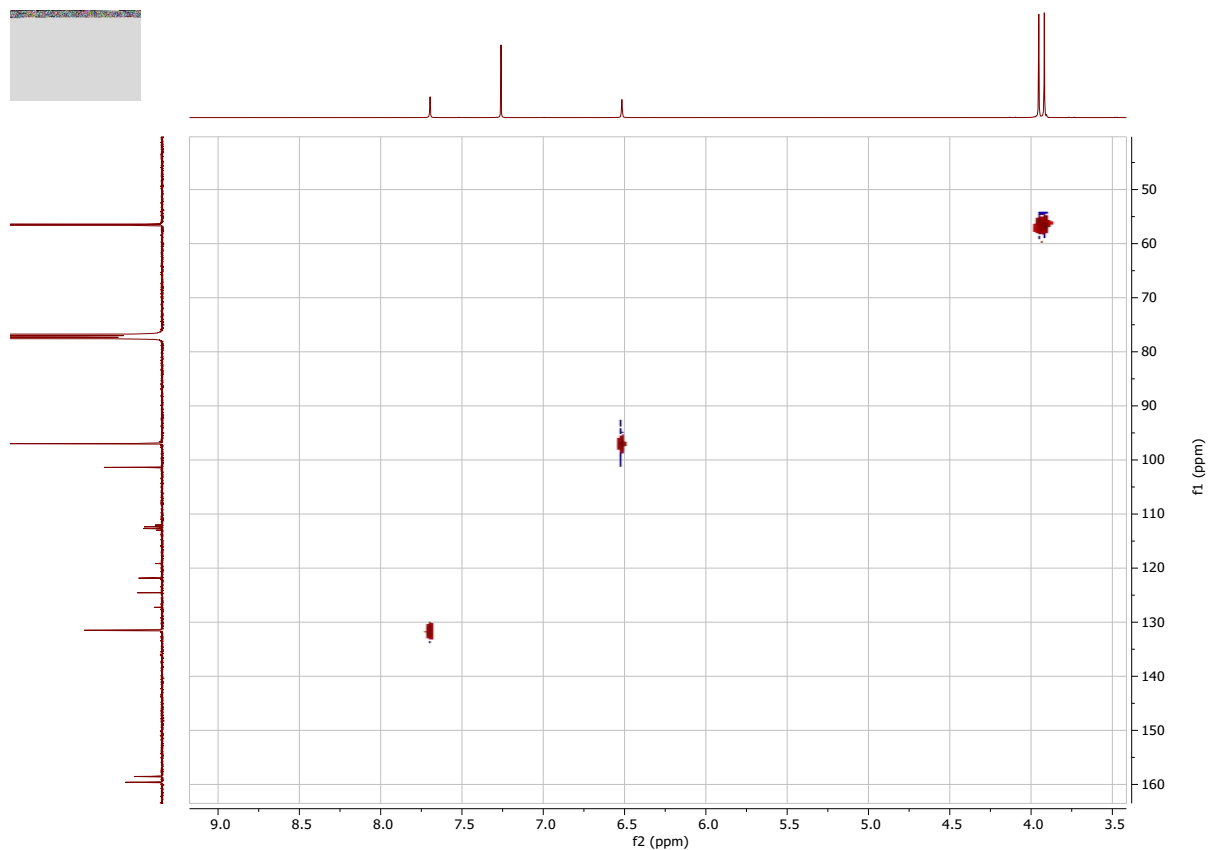

1-bromo-2,4-dimethoxy-5-(trifluoromethyl)benzene (3h), HMBC (CDCl<sub>3</sub>)

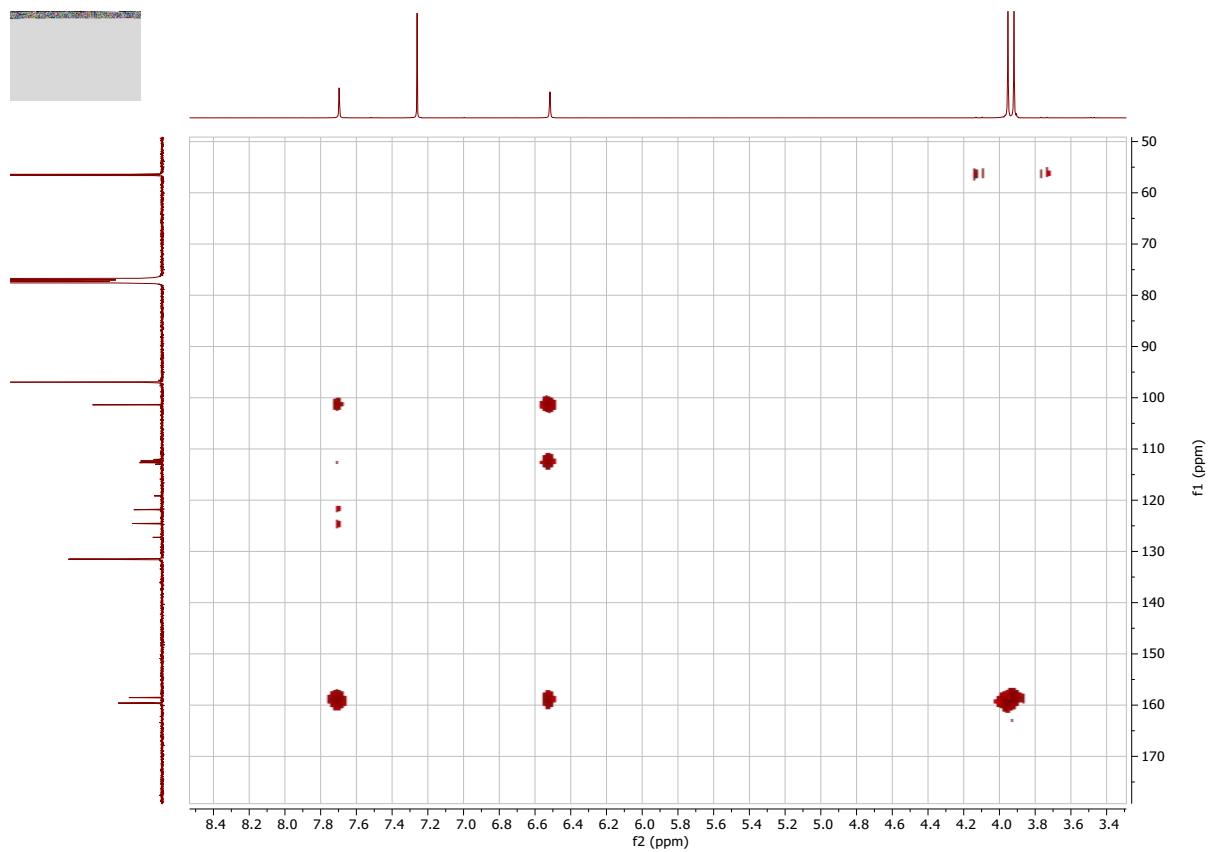



1-bromo-2,4-dimethoxy-5-(trifluoromethyl)benzene (3h),  $^{19}\text{F}$  NMR (376 MHz,  $\text{CDCl}_3$ )

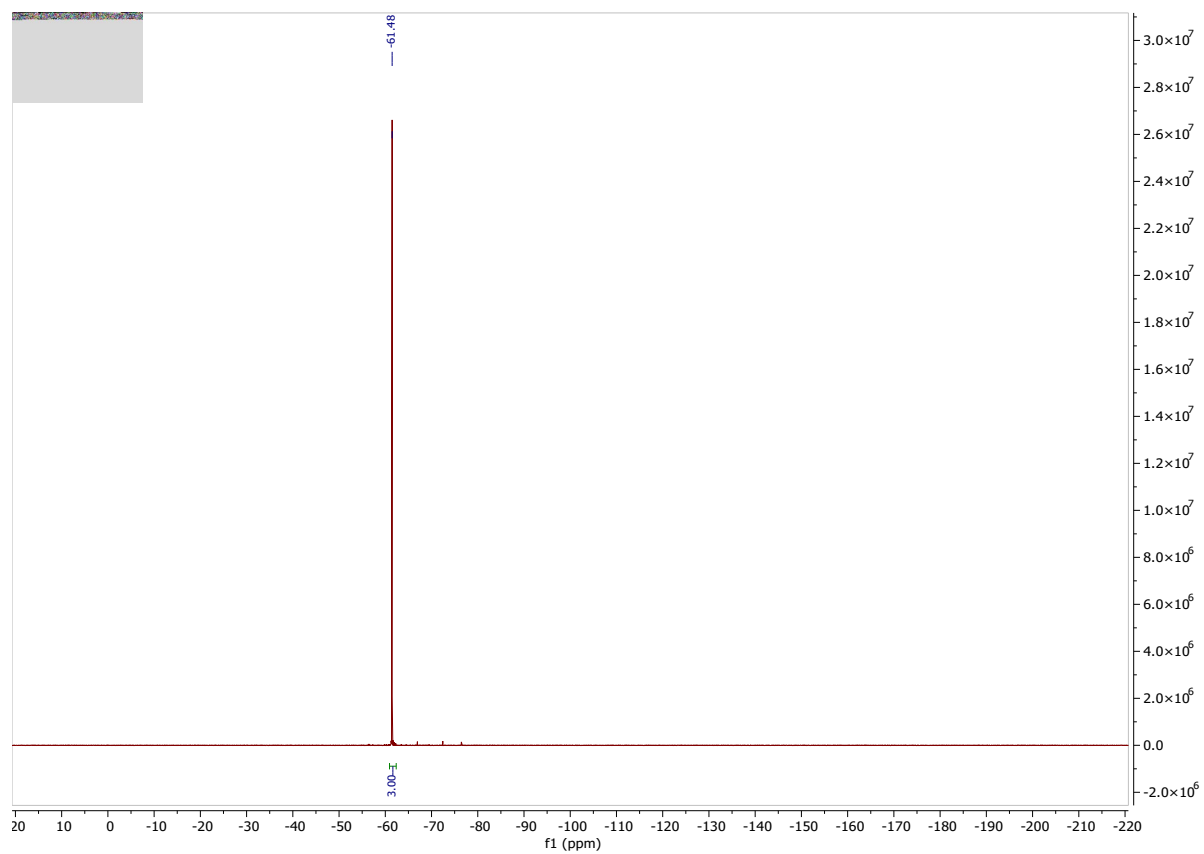

**1-bromo-2,4-dimethoxy-3-(trifluoromethyl)benzene : 2-bromo-1,5-dimethoxy-3-(trifluoromethyl)benzene**  
**(3h\* : 3h# isolated as a mixture with 1h (SM) in the ratio of 1 : 0.37 : 9), <sup>1</sup>H NMR (400 MHz, CDCl<sub>3</sub>)**

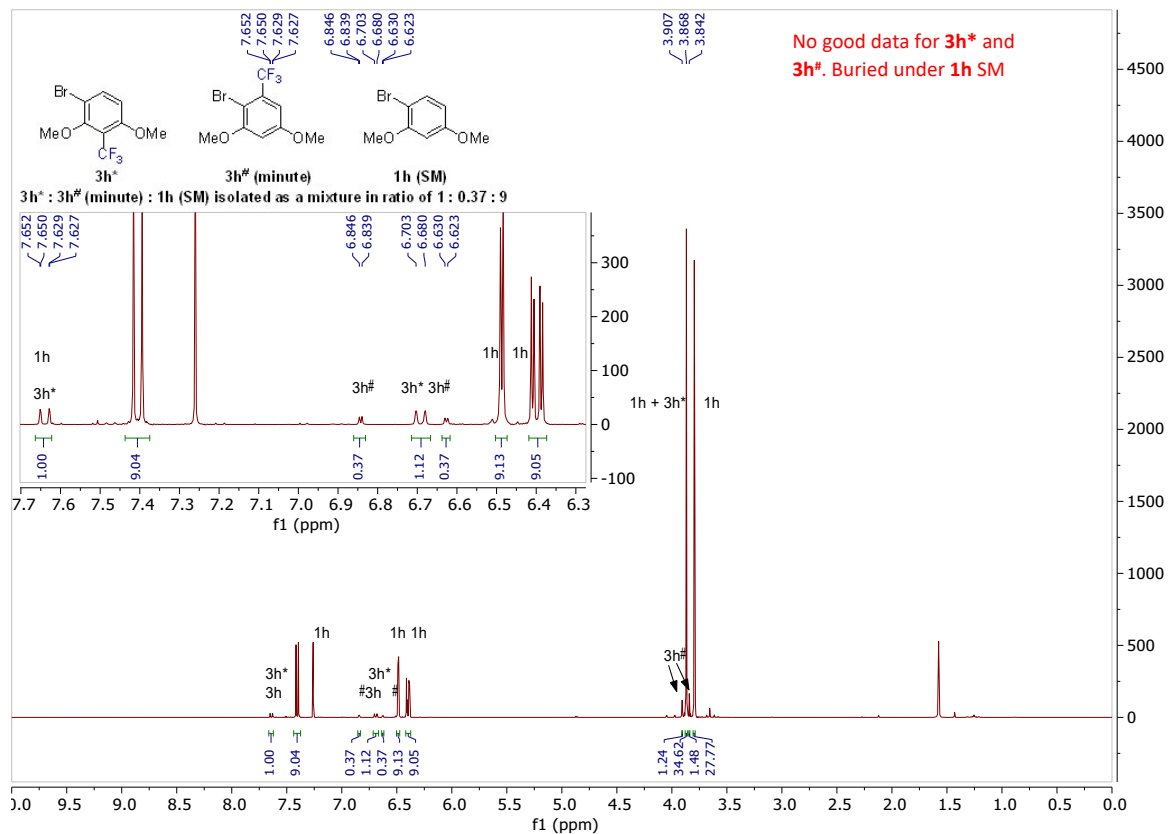

**1-bromo-2,4-dimethoxy-3-(trifluoromethyl)benzene : 2-bromo-1,5-dimethoxy-3-(trifluoromethyl)benzene**  
**(3h\* : 3h# isolated as a mixture with 1h (SM) in the ratio of 1 : 0.37 : 9), <sup>13</sup>C NMR (101 MHz, CDCl<sub>3</sub>)**

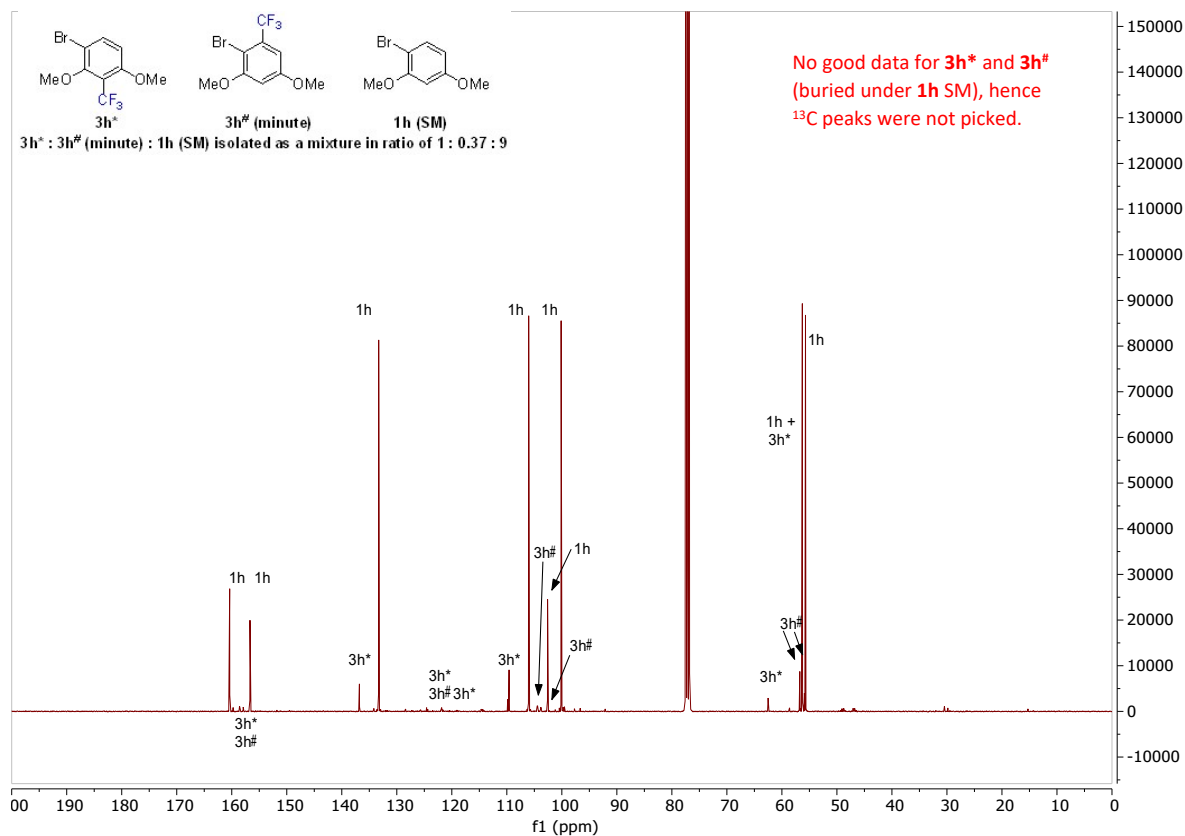

1-bromo-2,4-dimethoxy-3-(trifluoromethyl)benzene : 2-bromo-1,5-dimethoxy-3-(trifluoromethyl)benzene

(3h\* : 3h# isolated as a mixture with 1h (SM) in the ratio of 1 : 0.37 : 9), HSQC (CDCl<sub>3</sub>)

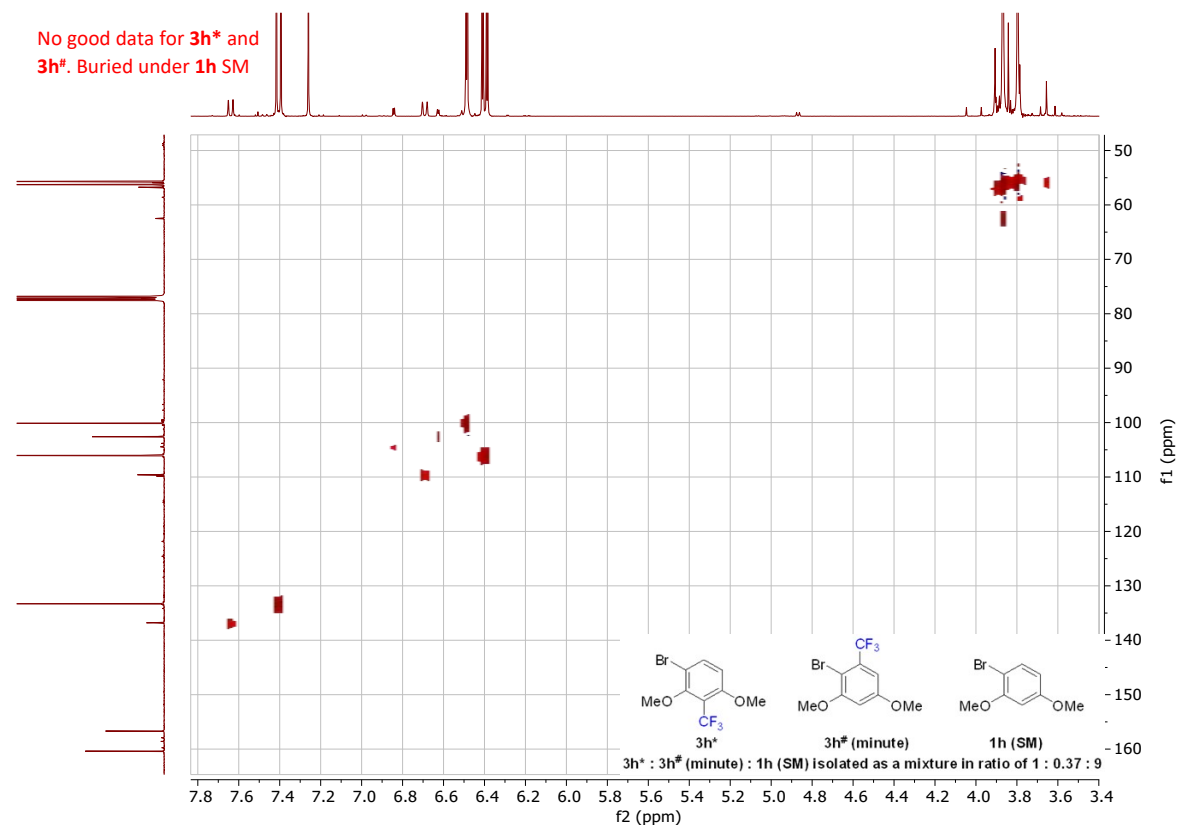

1-bromo-2,4-dimethoxy-3-(trifluoromethyl)benzene : 2-bromo-1,5-dimethoxy-3-(trifluoromethyl)benzene

(3h\* : 3h# isolated as a mixture with 1h (SM) in the ratio of 1 : 0.37 : 9), HMBC (CDCl<sub>3</sub>)

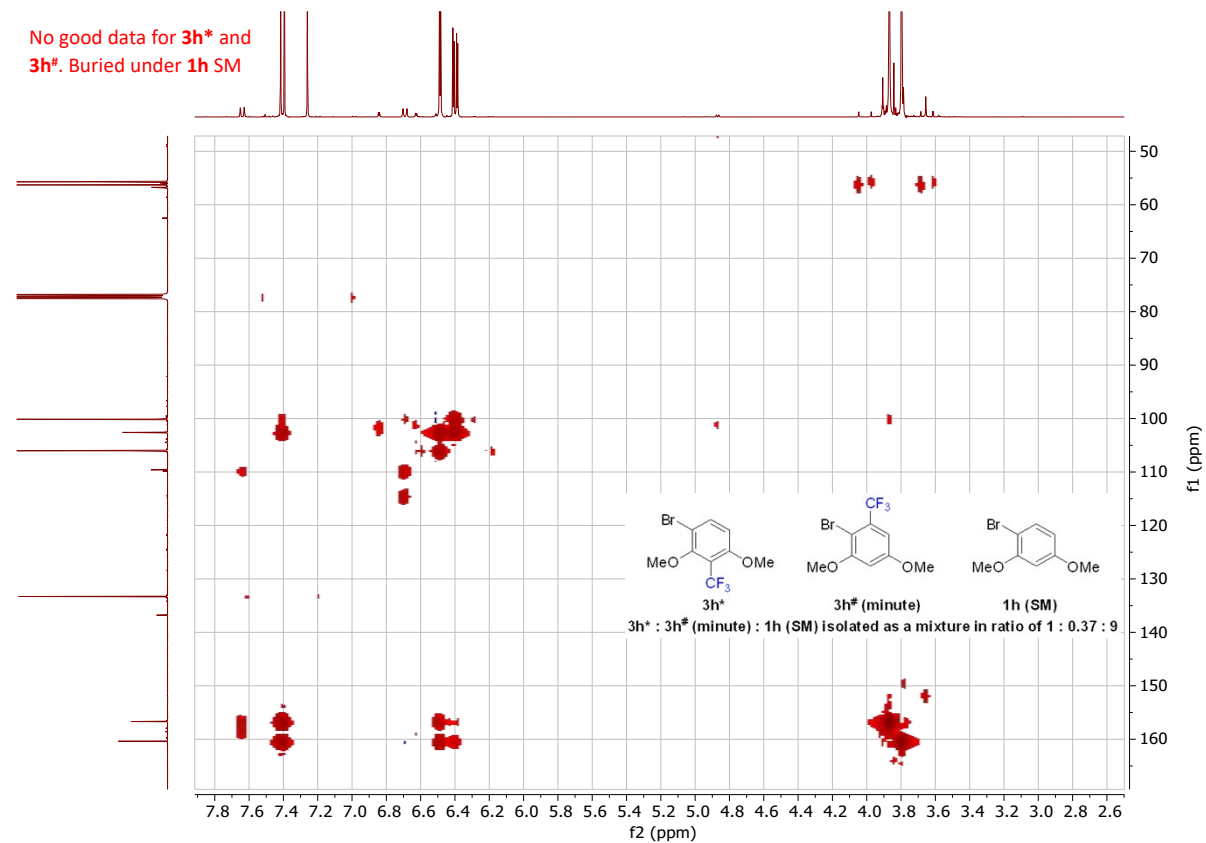

1-bromo-2,4-dimethoxy-3-(trifluoromethyl)benzene : 2-bromo-1,5-dimethoxy-3-(trifluoromethyl)benzene  
(3h\* : 3h# isolated as a mixture with 1h (SM) in the ratio of 1 : 0.37 : 9), <sup>19</sup>F NMR (376 MHz, CDCl<sub>3</sub>)

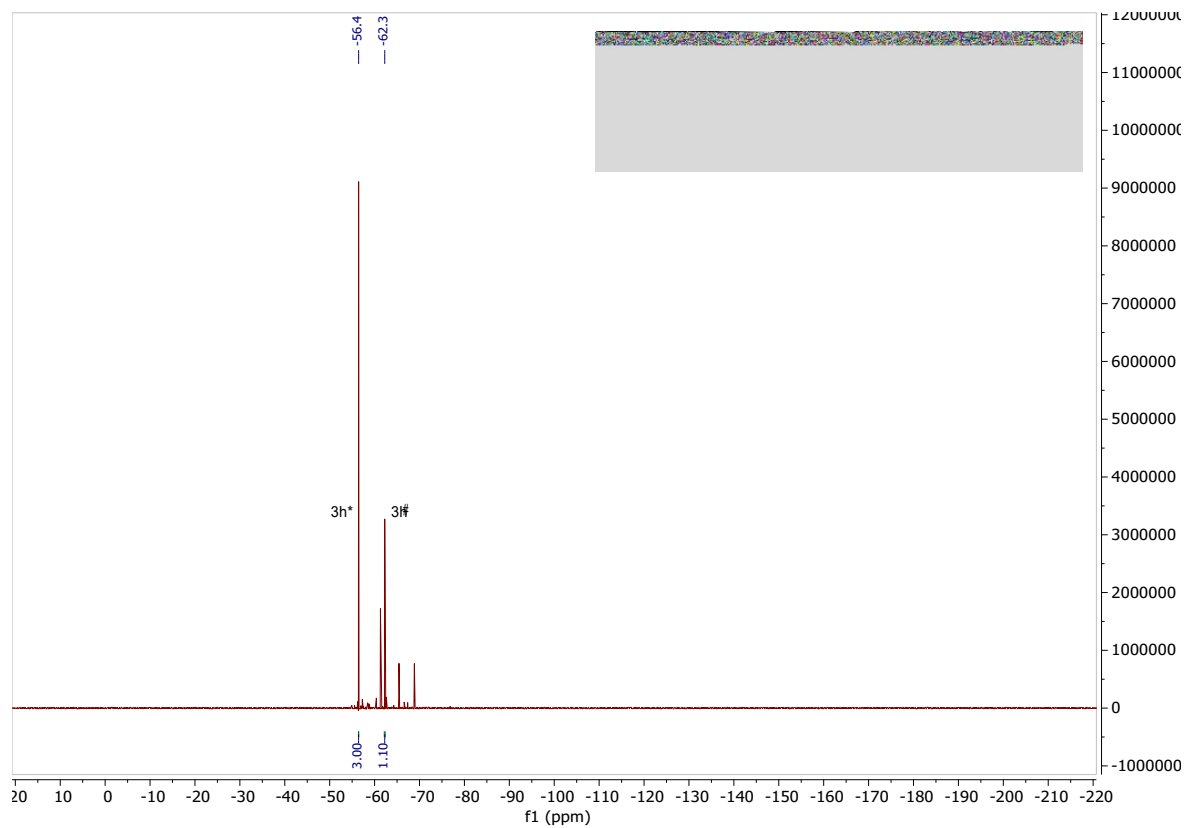

**2-isopropyl-5-methyl-4-(trifluoromethyl)phenol (3j), <sup>1</sup>H NMR (400 MHz, CDCl<sub>3</sub>)**

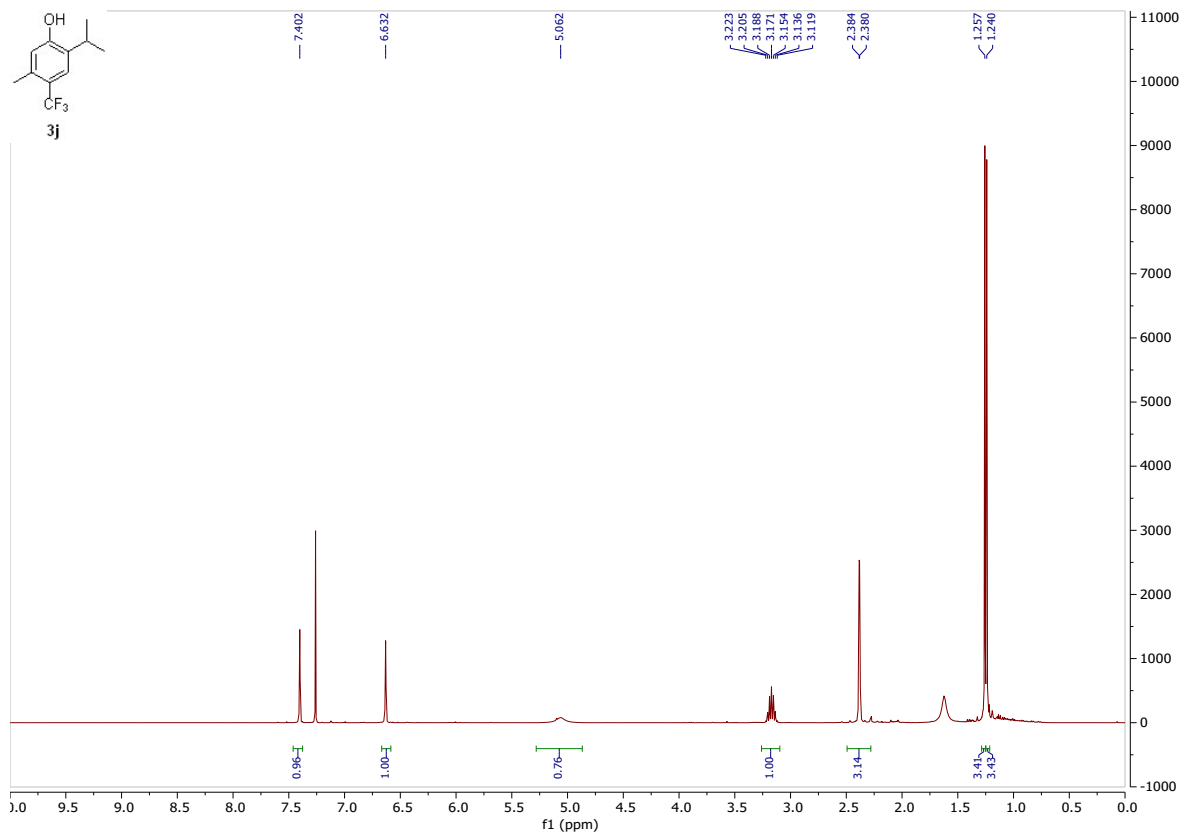

**2-isopropyl-5-methyl-4-(trifluoromethyl)phenol (3j), <sup>13</sup>C NMR (101 MHz, CDCl<sub>3</sub>)**

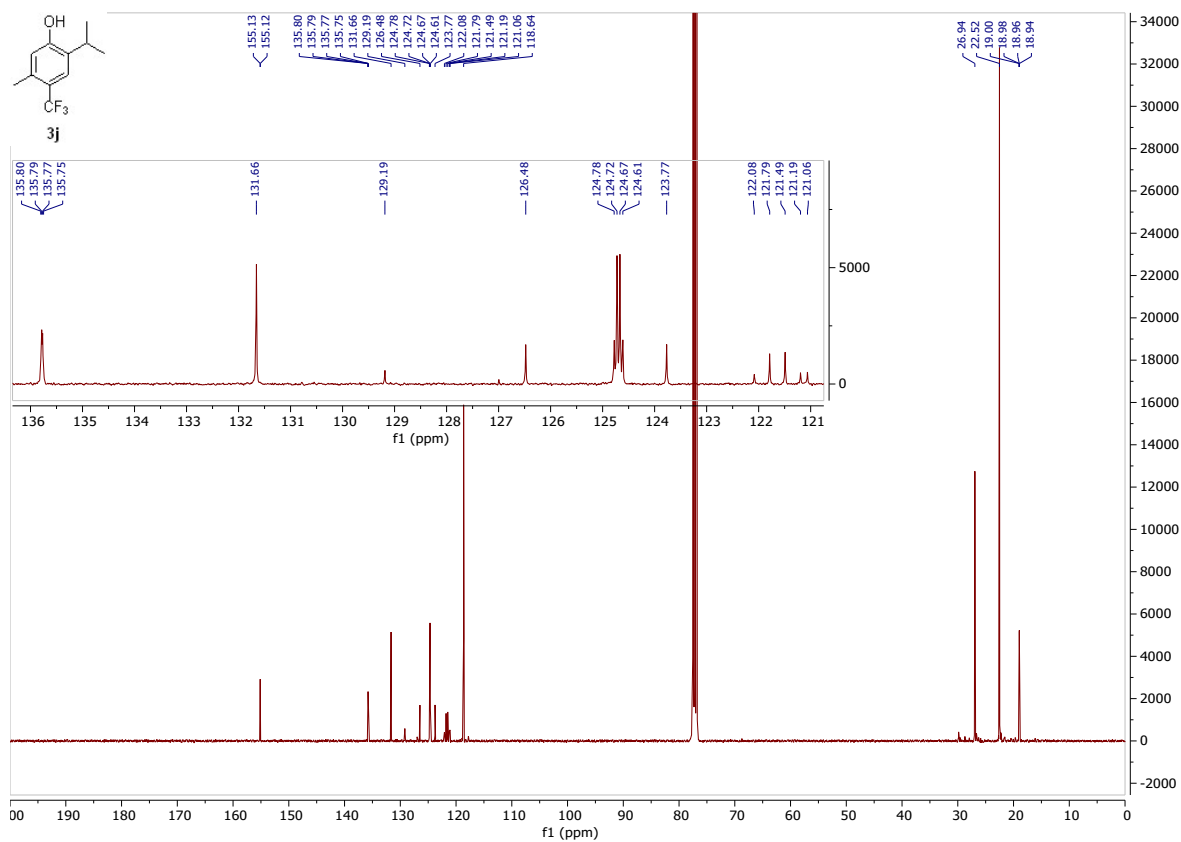

2-isopropyl-5-methyl-4-(trifluoromethyl)phenol (3j), HSQC (CDCl<sub>3</sub>)

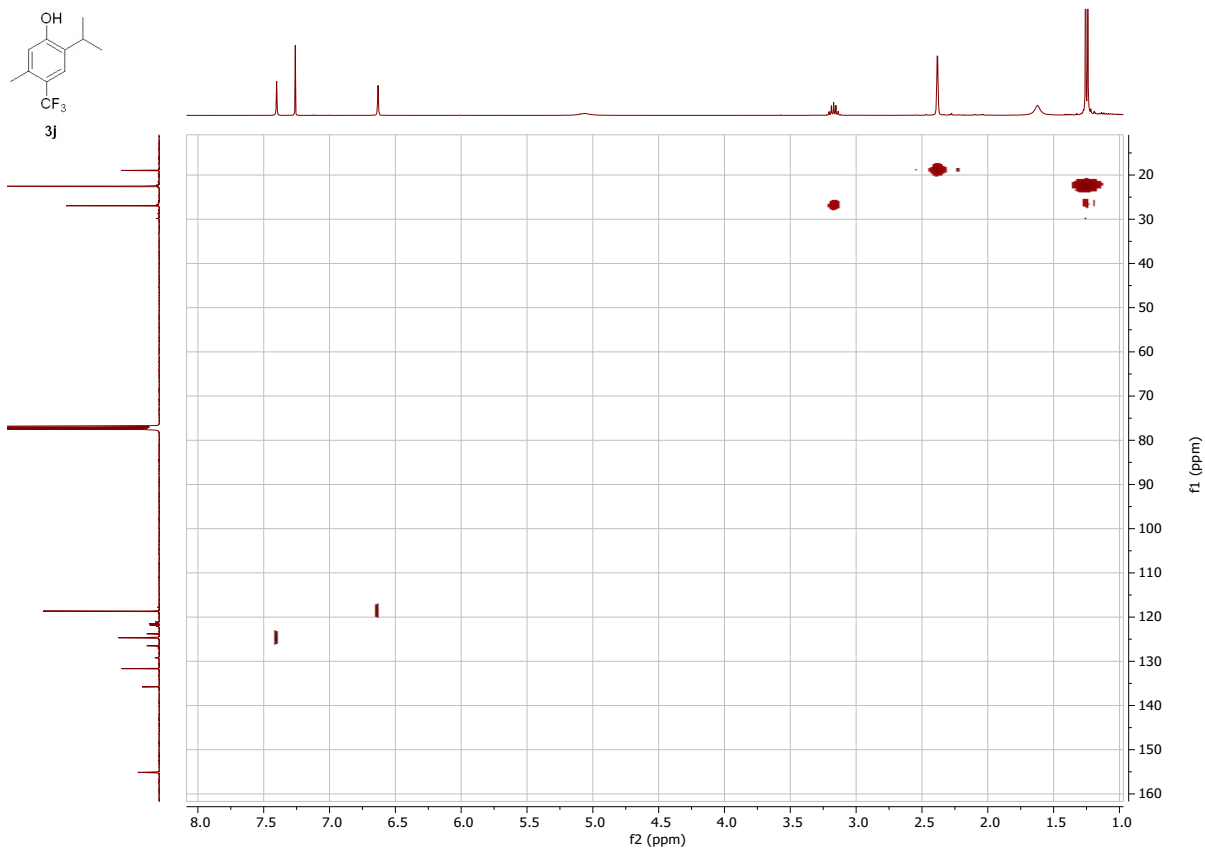

2-isopropyl-5-methyl-4-(trifluoromethyl)phenol (3j), HMBC (CDCl<sub>3</sub>)

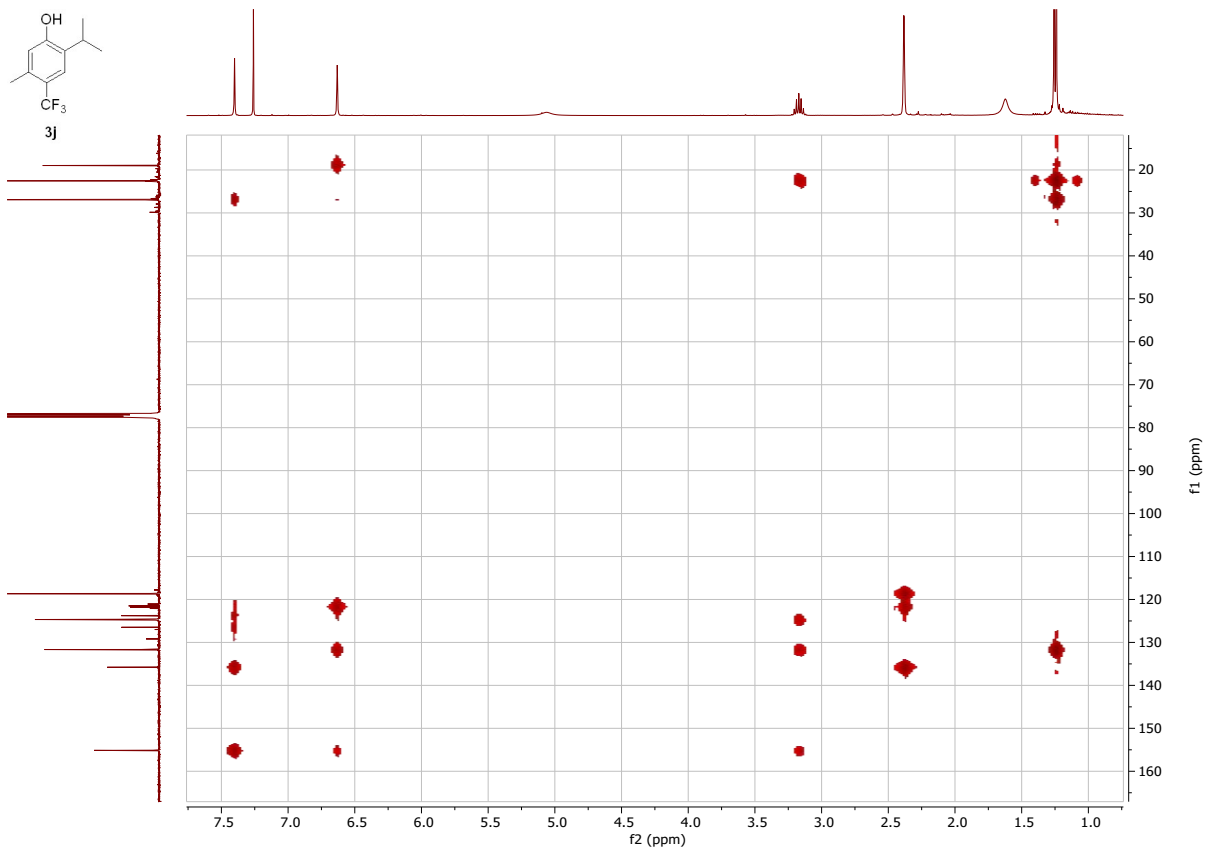

2-isopropyl-5-methyl-4-(trifluoromethyl)phenol (3j),  $^{19}\text{F}$  NMR (376 MHz,  $\text{CDCl}_3$ )

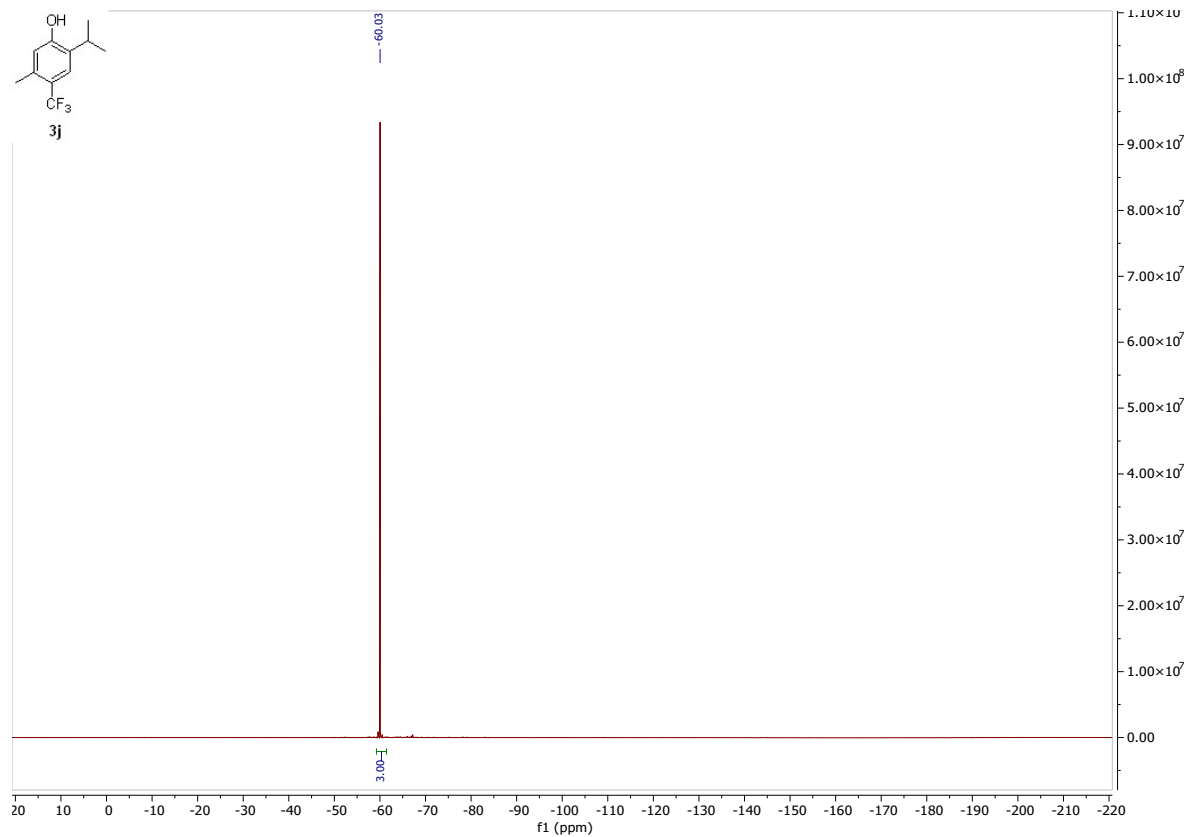

**6-isopropyl-3-methyl-2-(trifluoromethyl)phenol (3j\*), <sup>1</sup>H NMR (400 MHz, CDCl<sub>3</sub>)**

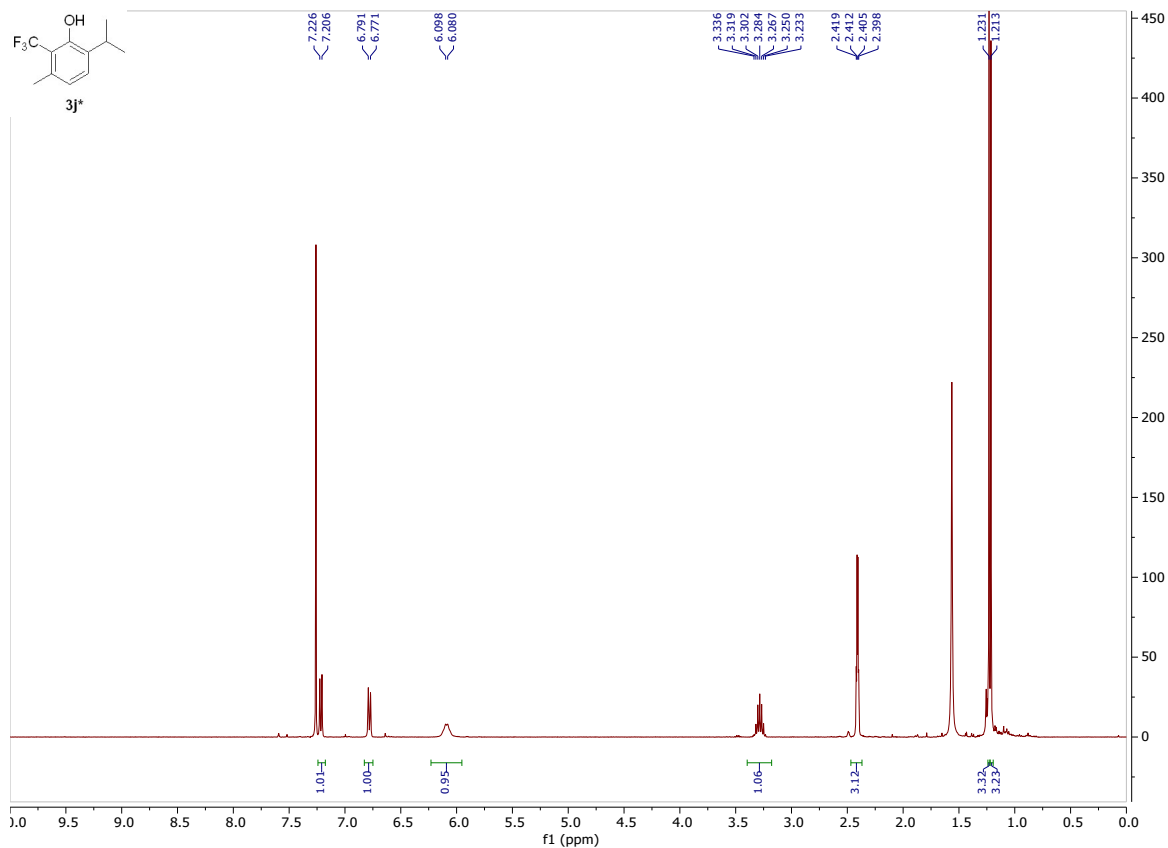

**6-isopropyl-3-methyl-2-(trifluoromethyl)phenol (3j\*), <sup>13</sup>C NMR (101 MHz, CDCl<sub>3</sub>)**

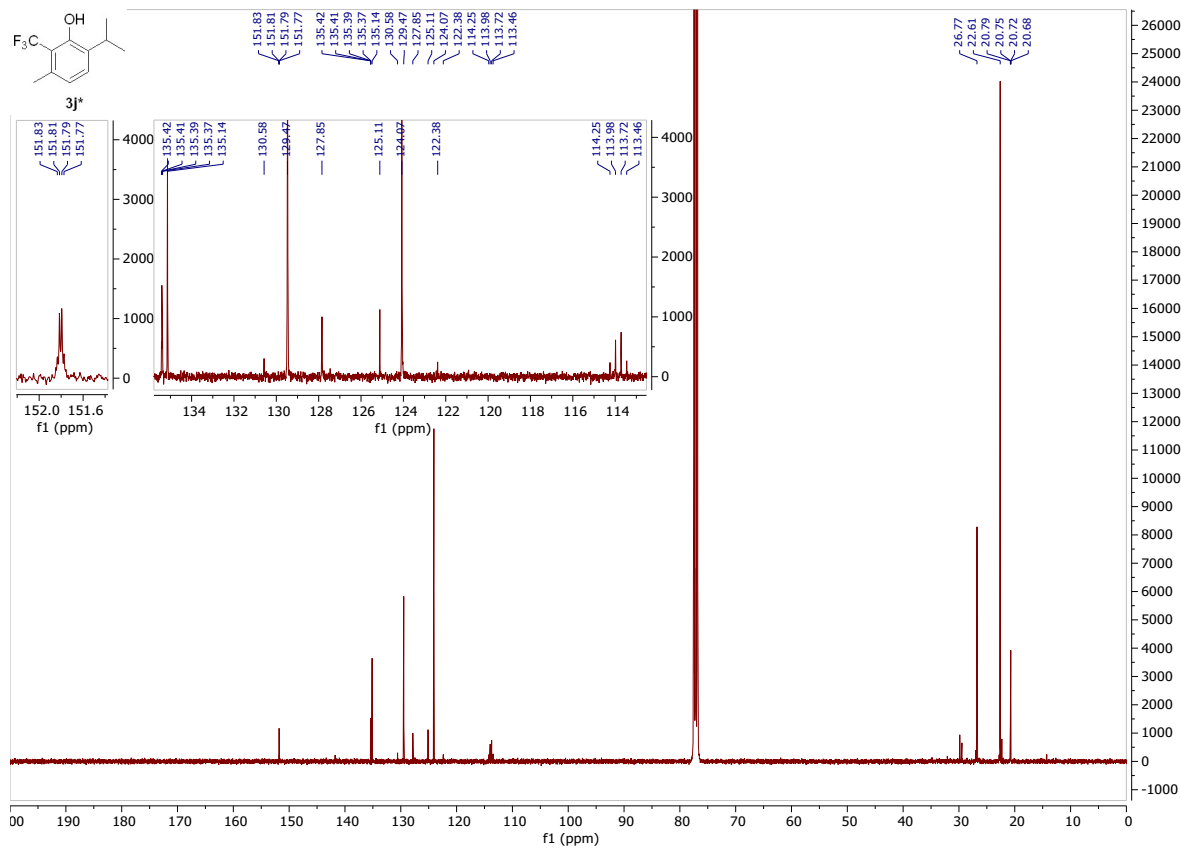



6-isopropyl-3-methyl-2-(trifluoromethyl)phenol (3j\*), HSQC (CDCl<sub>3</sub>)

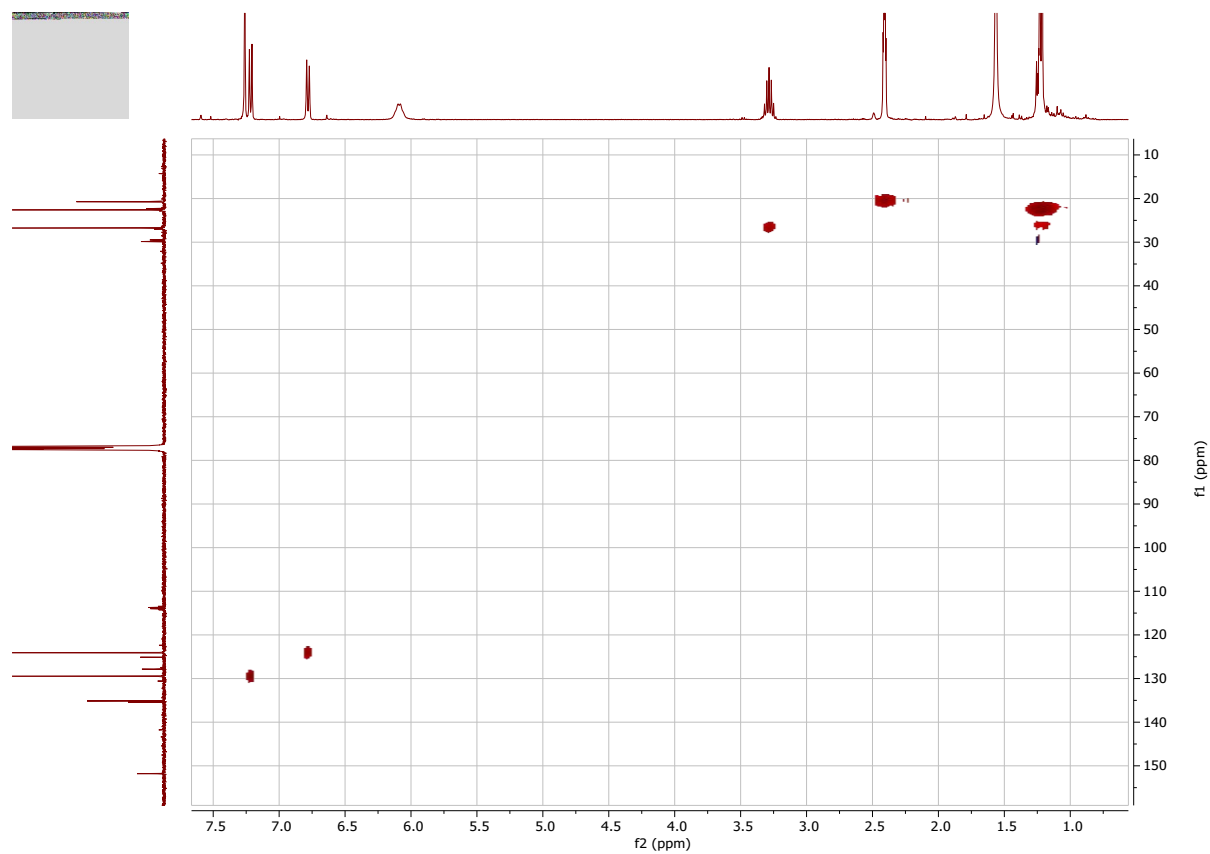

6-isopropyl-3-methyl-2-(trifluoromethyl)phenol (3j\*), HMBC (CDCl<sub>3</sub>)

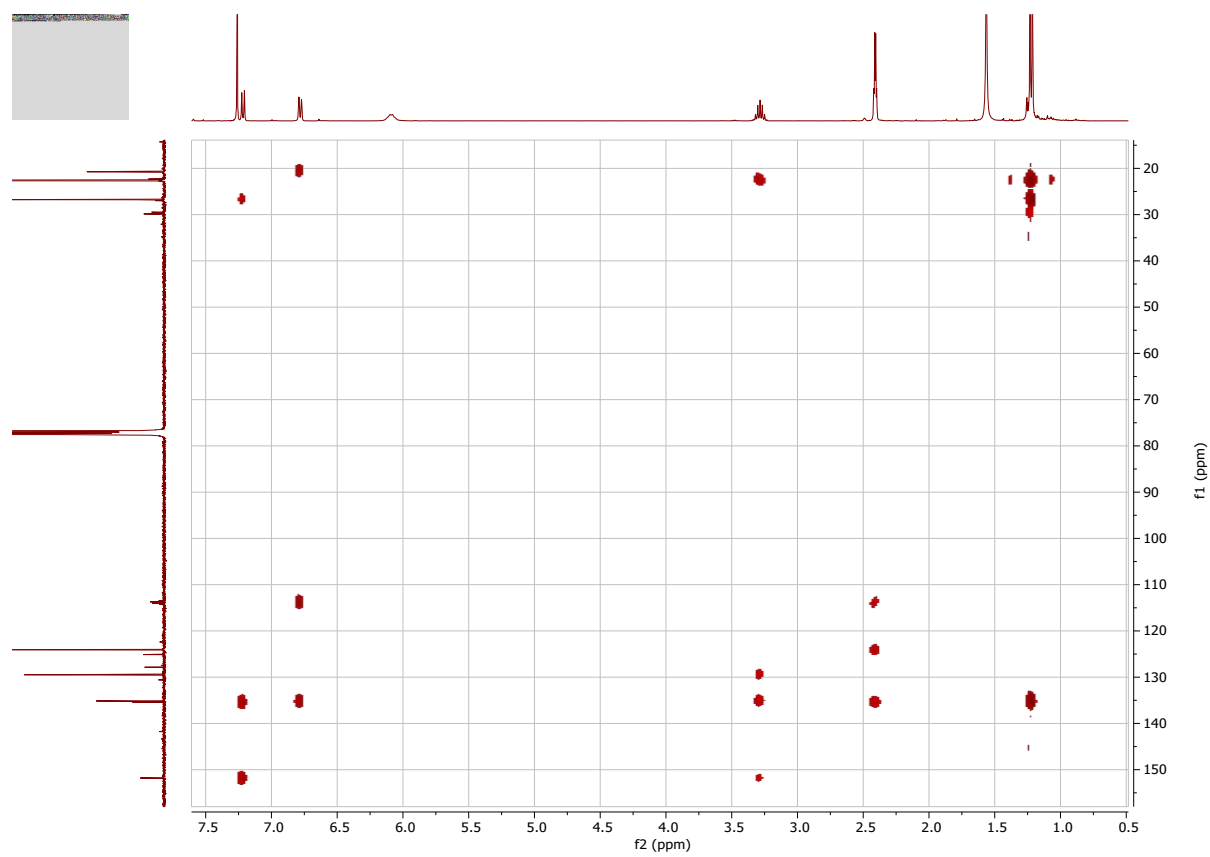

6-isopropyl-3-methyl-2-(trifluoromethyl)phenol (3j\*), <sup>19</sup>F NMR (376 MHz, CDCl<sub>3</sub>)

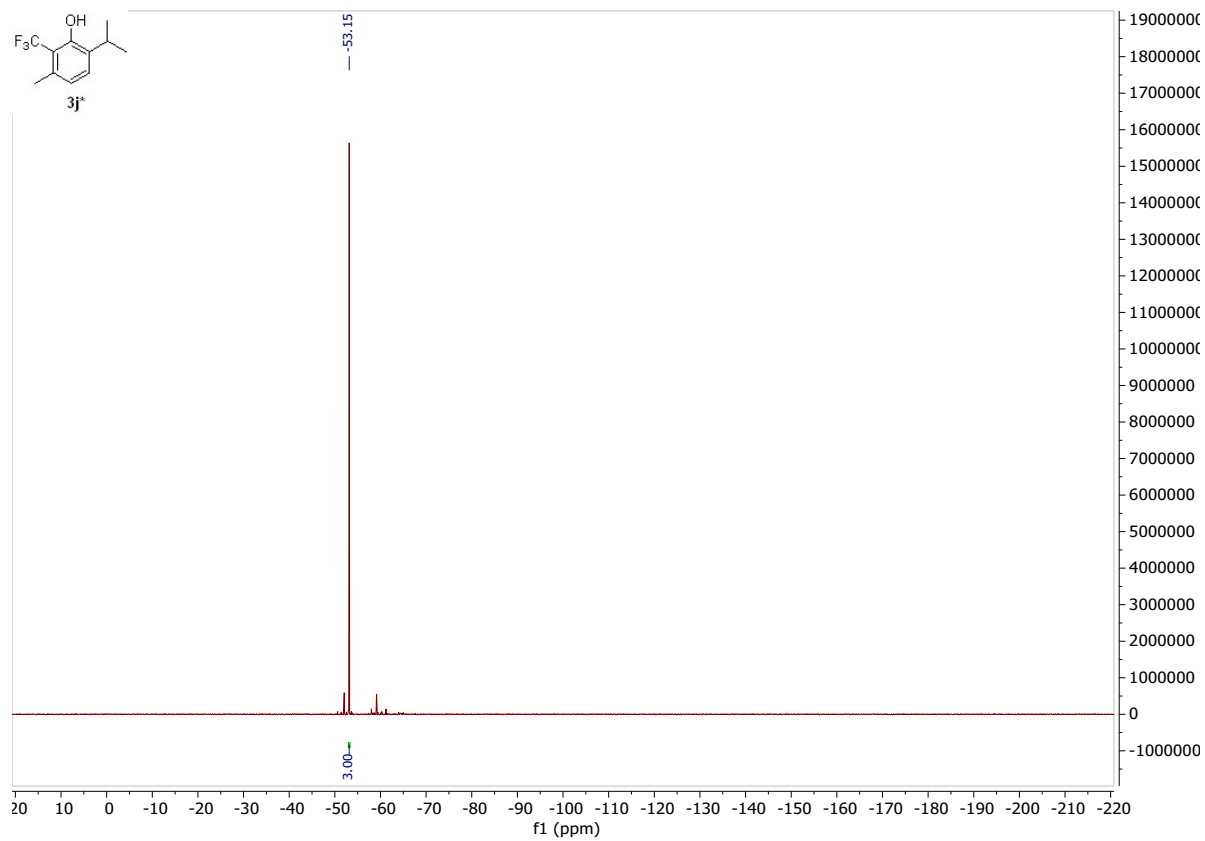

**5-isopropyl-2-methyl-4-(trifluoromethyl)phenol : 5-isopropyl-2-methyl-3-(trifluoromethyl)phenol (3k : 3k# in ratio of 1 : 0.3), <sup>1</sup>H NMR (400 MHz, CDCl<sub>3</sub>)**

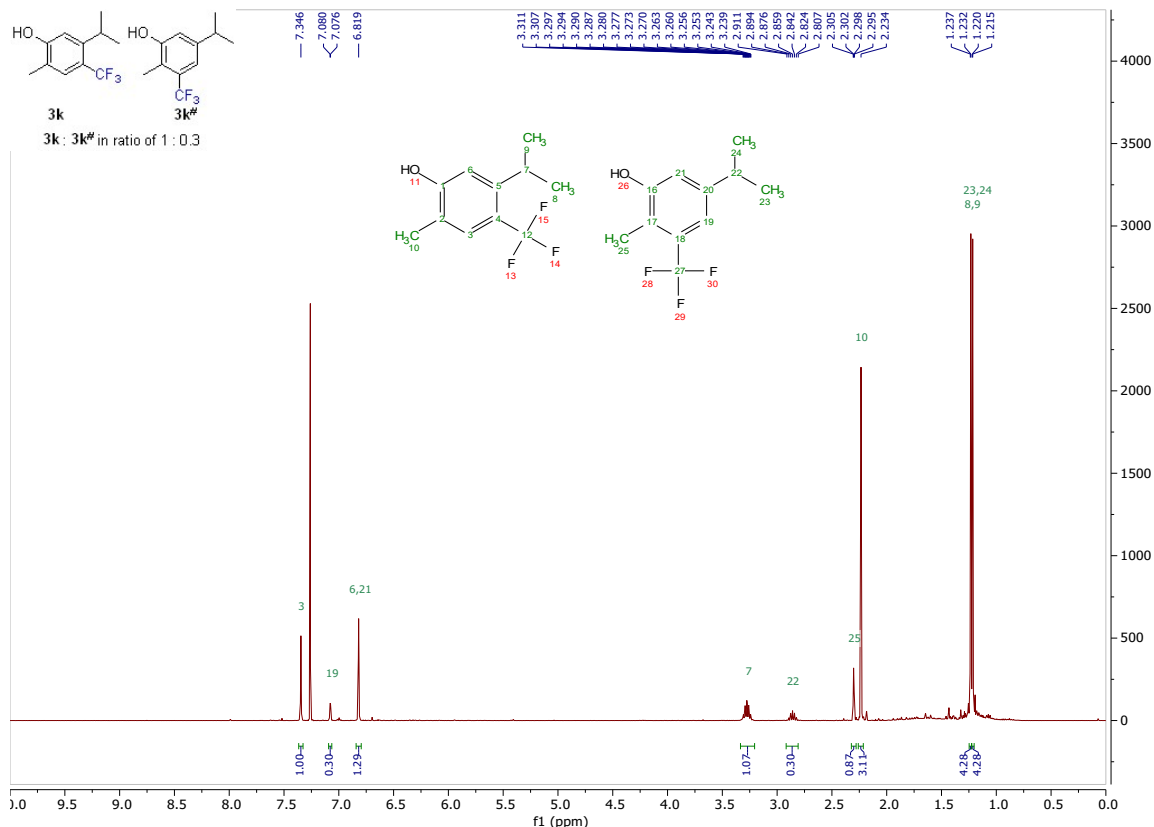

5-isopropyl-2-methyl-4-(trifluoromethyl)phenol : 5-isopropyl-2-methyl-3-(trifluoromethyl)phenol (3k : 3k# in ratio of 1 : 0.3), HSQC (CDCl<sub>3</sub>)

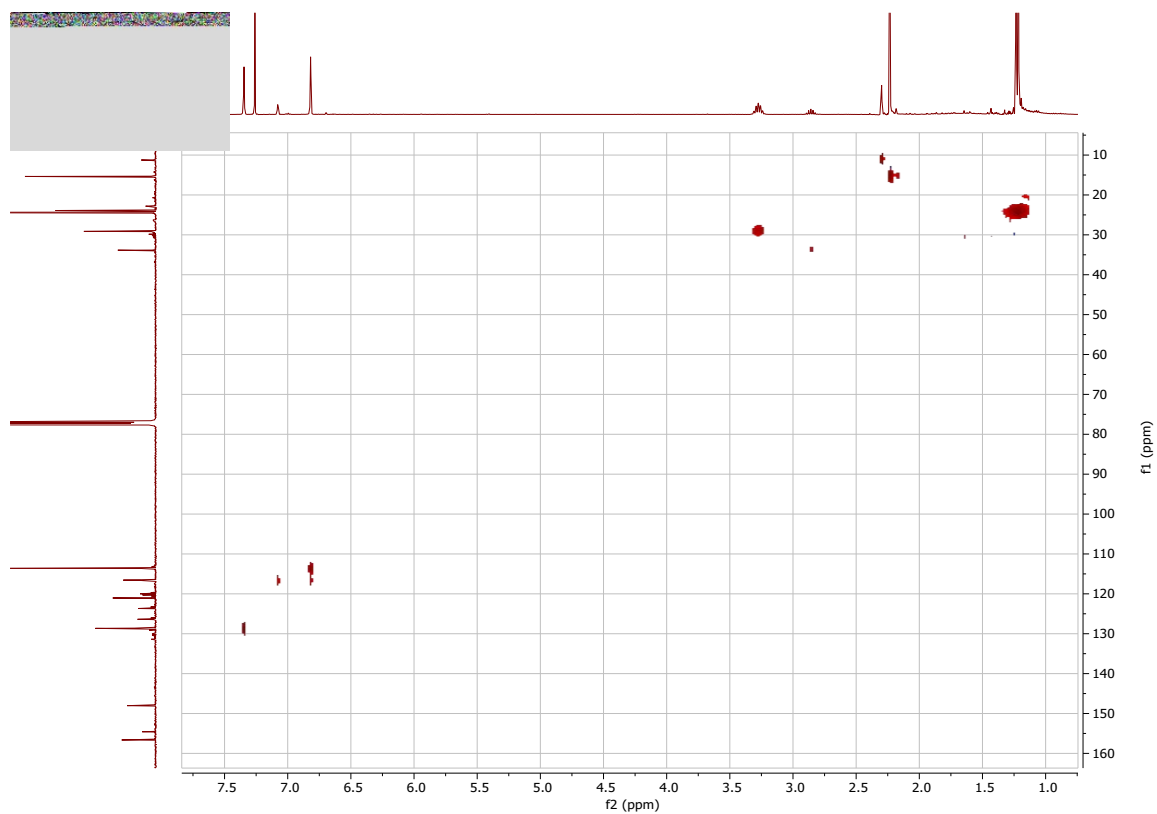

5-isopropyl-2-methyl-4-(trifluoromethyl)phenol : 5-isopropyl-2-methyl-3-(trifluoromethyl)phenol (3k : 3k# in ratio of 1 : 0.3), HMBC (CDCl<sub>3</sub>)

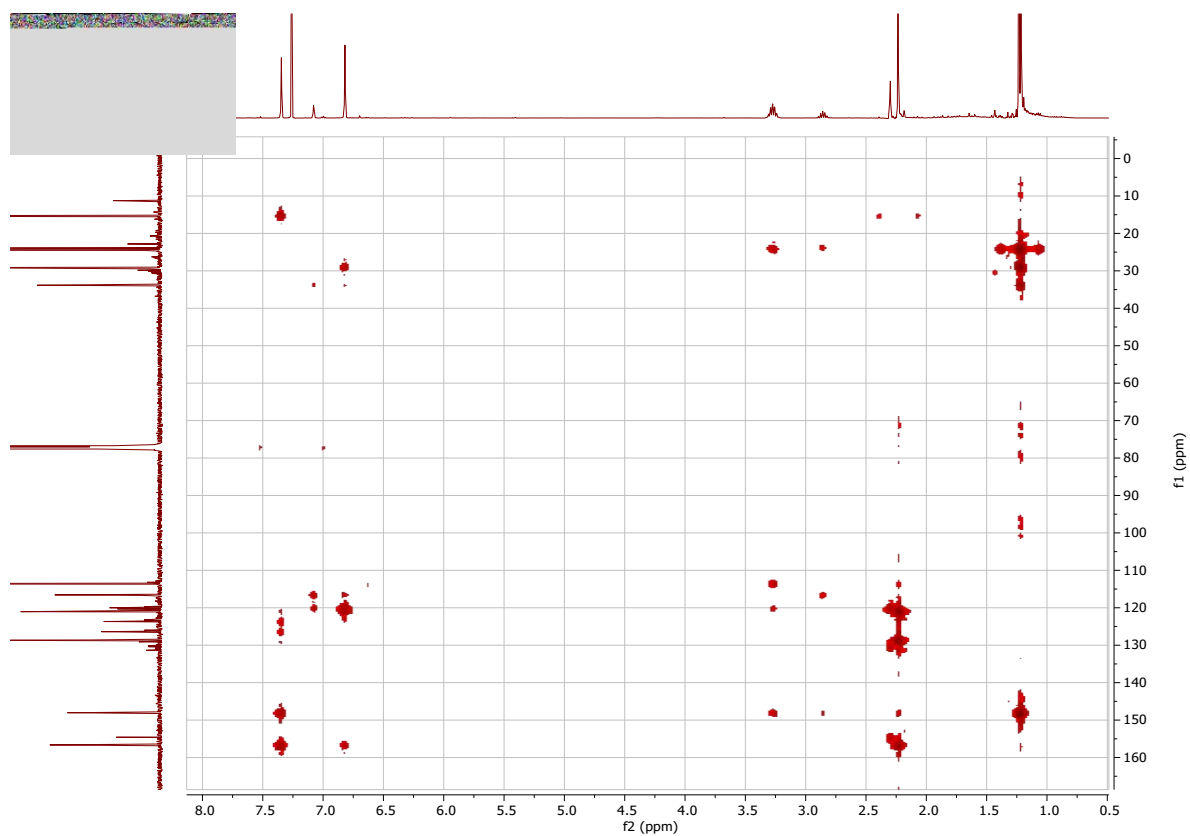

5-isopropyl-2-methyl-4-(trifluoromethyl)phenol : 5-isopropyl-2-methyl-3-(trifluoromethyl)phenol (3k : 3k# in ratio of 1 : 0.3), <sup>19</sup>F NMR (376 MHz, CDCl<sub>3</sub>)

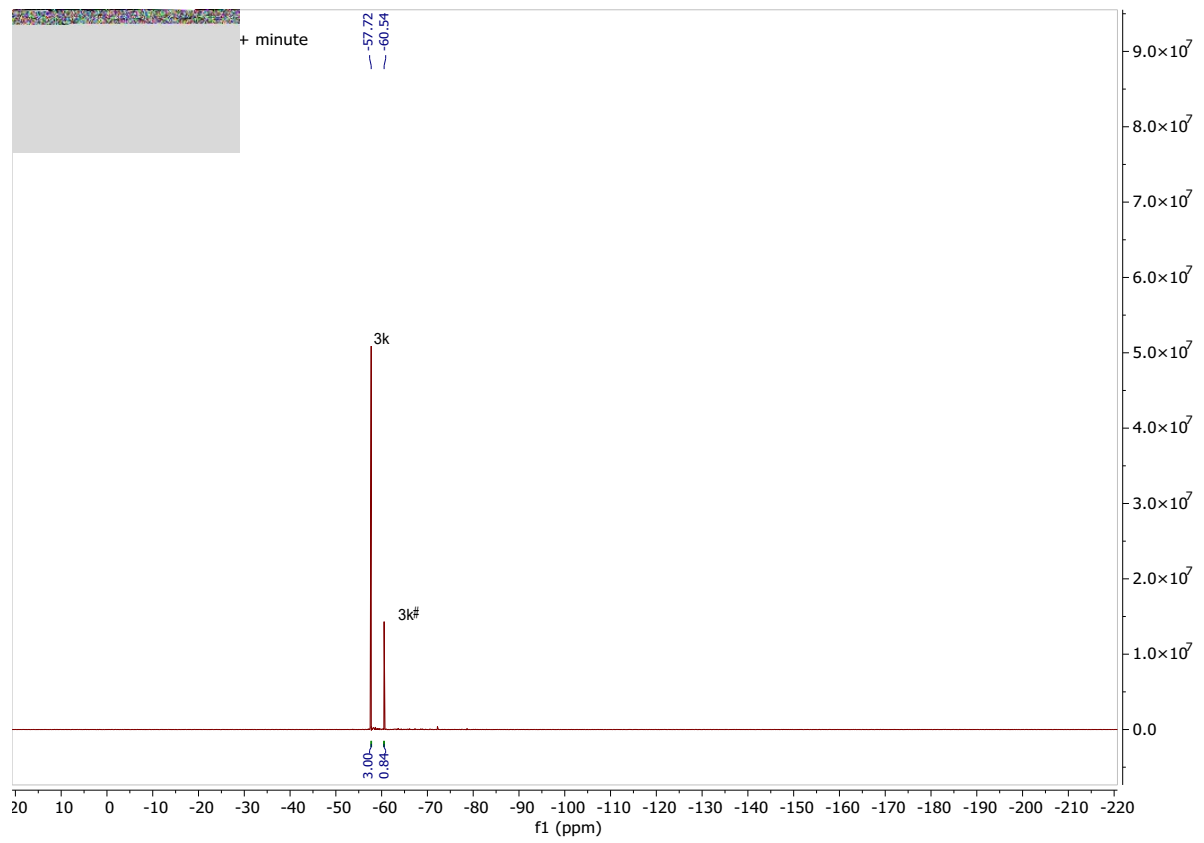

**3-isopropyl-6-methyl-2-(trifluoromethyl)phenol(3k\*), <sup>1</sup>H NMR (400 MHz, CDCl<sub>3</sub>)**

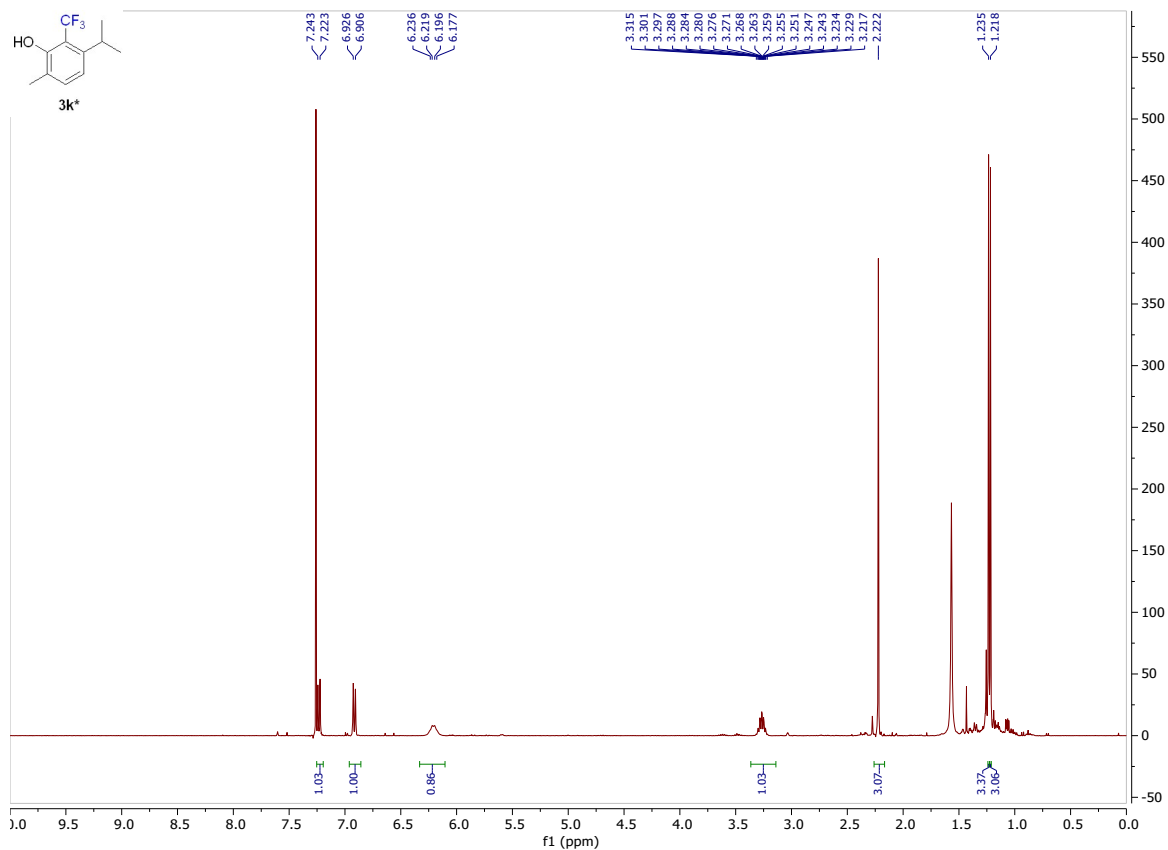

**3-isopropyl-6-methyl-2-(trifluoromethyl)phenol(3k\*), <sup>13</sup>C NMR (101 MHz, CDCl<sub>3</sub>)**

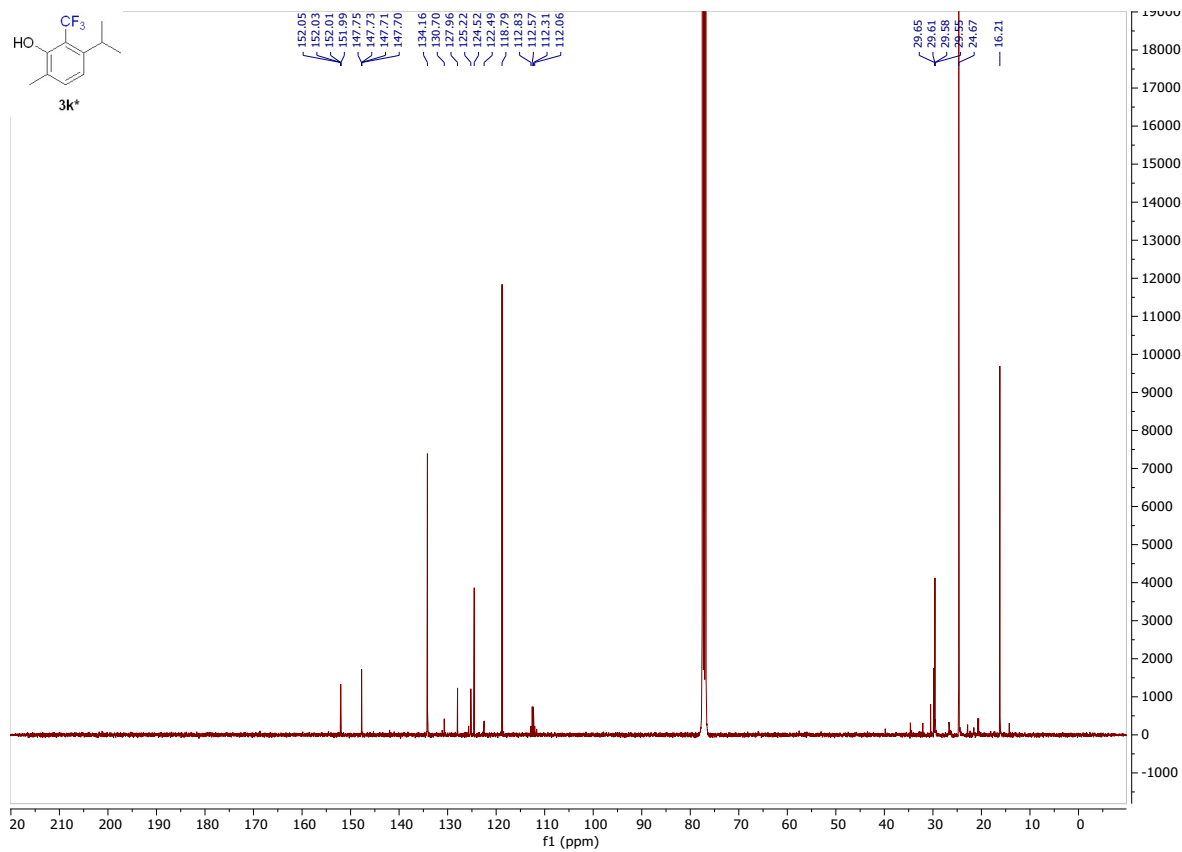

**3-isopropyl-6-methyl-2-(trifluoromethyl)phenol(3k\*), HSQC (CDCl<sub>3</sub>)**

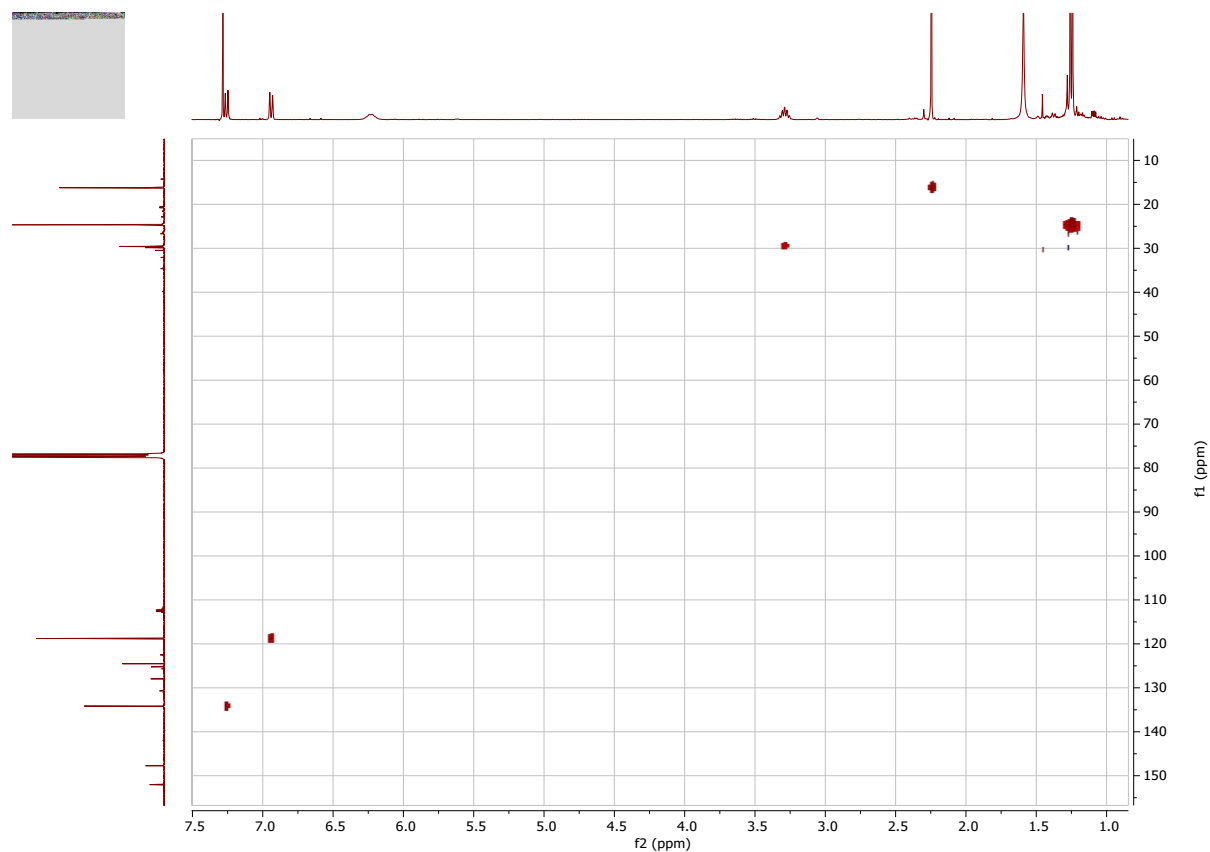

**3-isopropyl-6-methyl-2-(trifluoromethyl)phenol(3k\*), HMBC (CDCl<sub>3</sub>)**

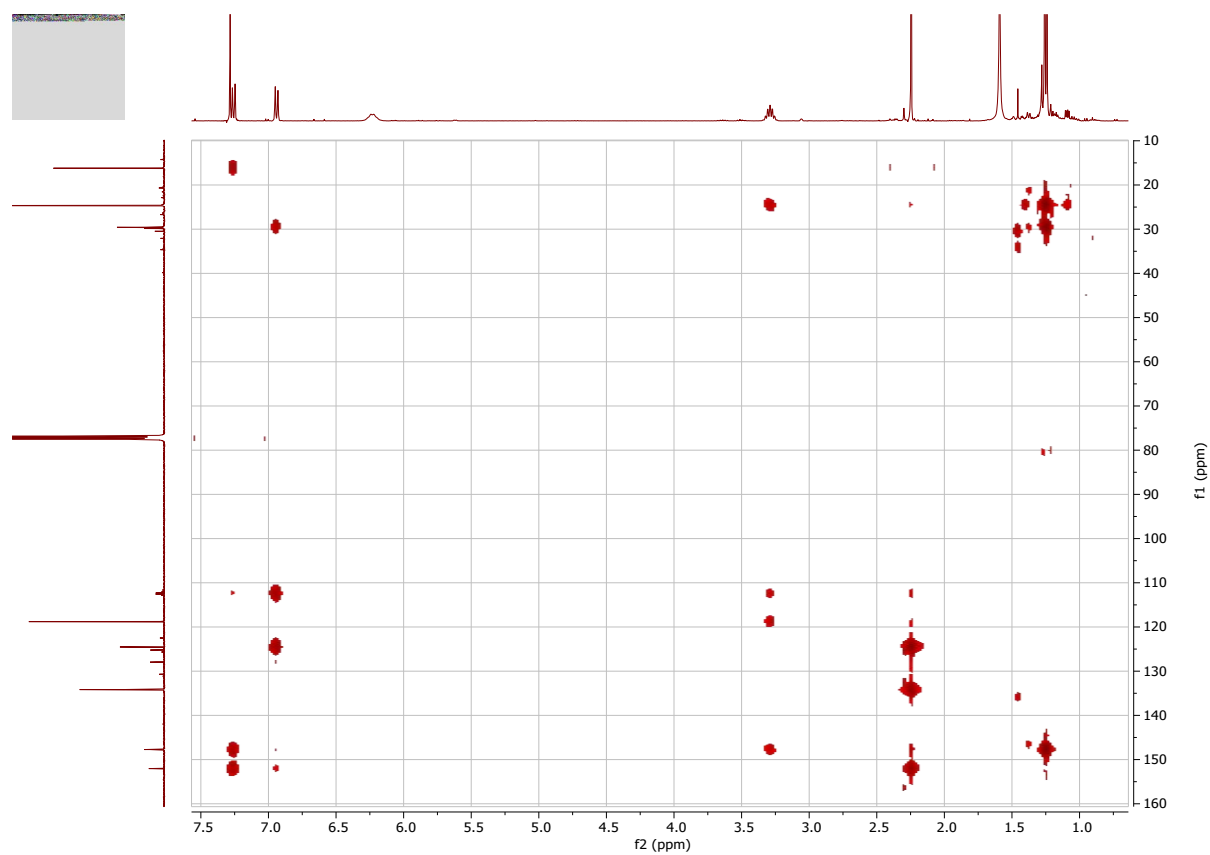

**3-isopropyl-6-methyl-2-(trifluoromethyl)phenol(3k\*), <sup>19</sup>F NMR (376 MHz, CDCl<sub>3</sub>)**

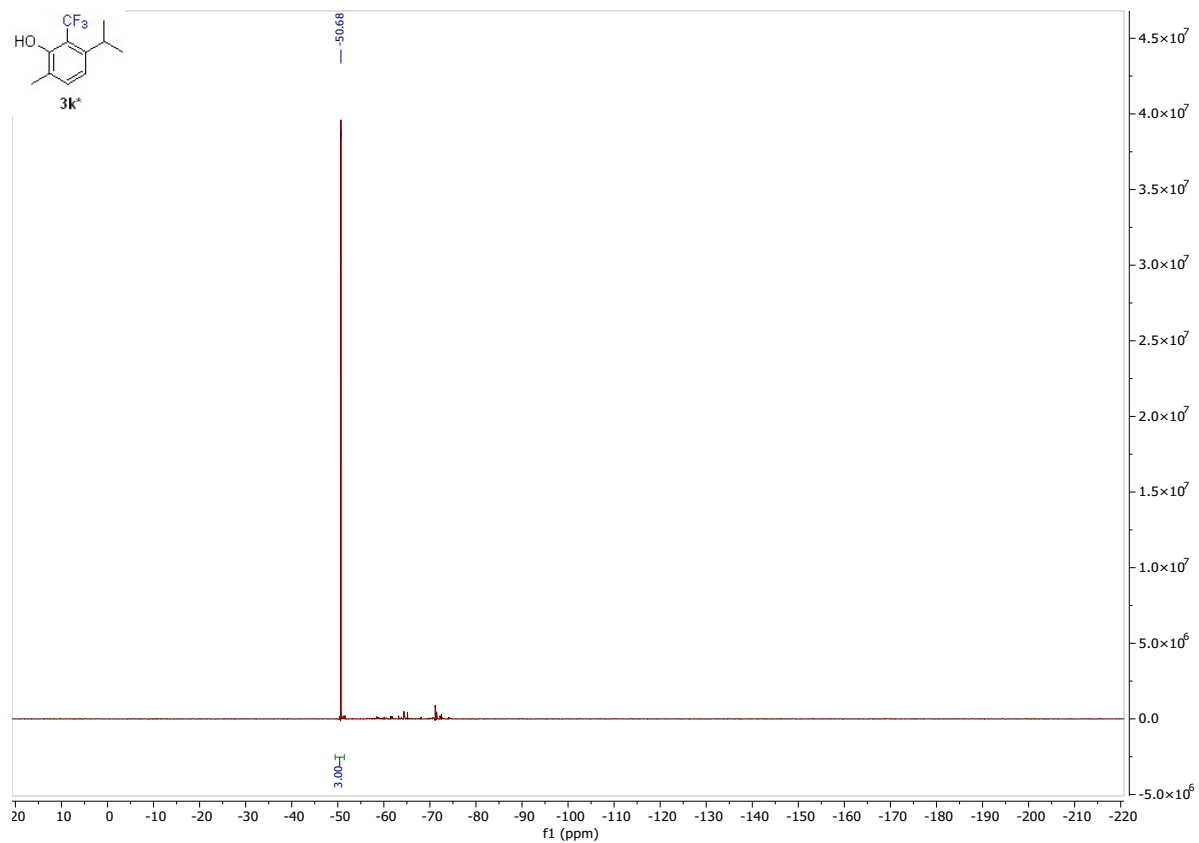



4-(butoxymethyl)-2-methoxy-5-(trifluoromethyl)phenol (**31**),  $^1\text{H}$  NMR (400 MHz,  $\text{CDCl}_3$ )

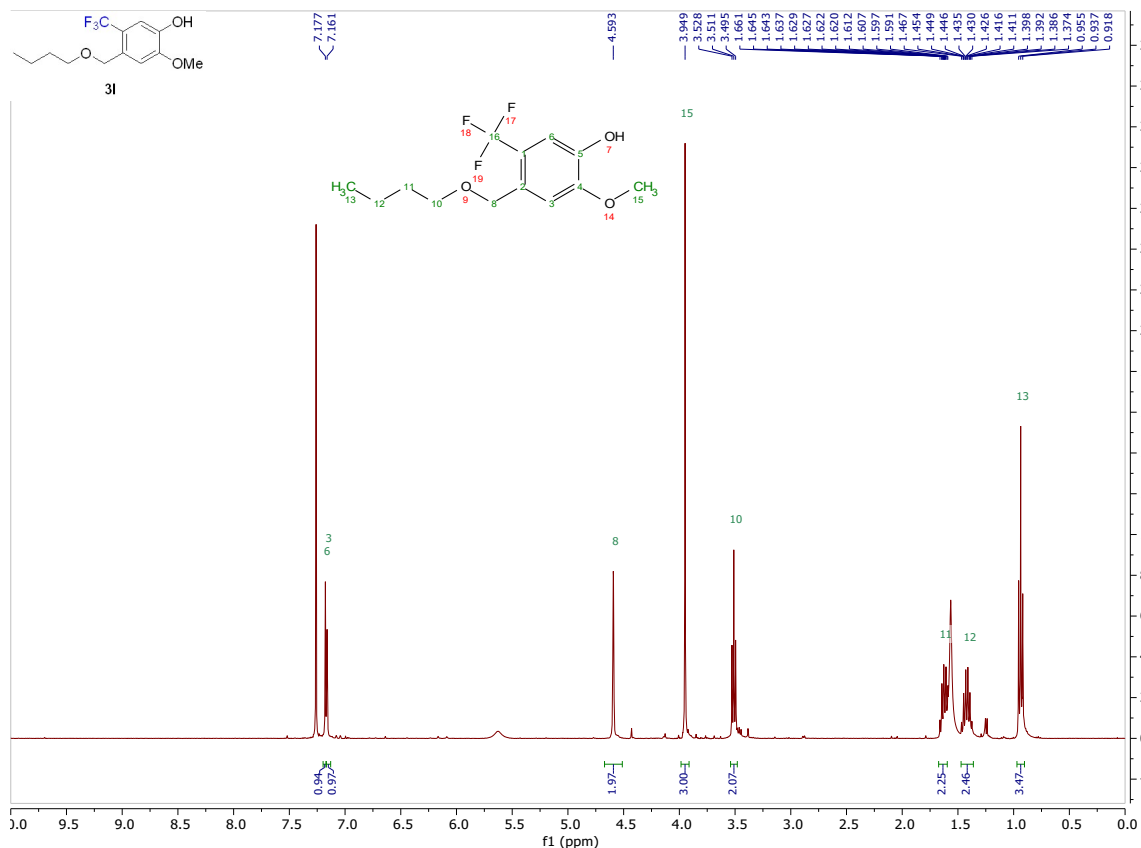

4-(butoxymethyl)-2-methoxy-5-(trifluoromethyl)phenol (**31**),  $^{13}\text{C}$  NMR (101 MHz,  $\text{CDCl}_3$ )

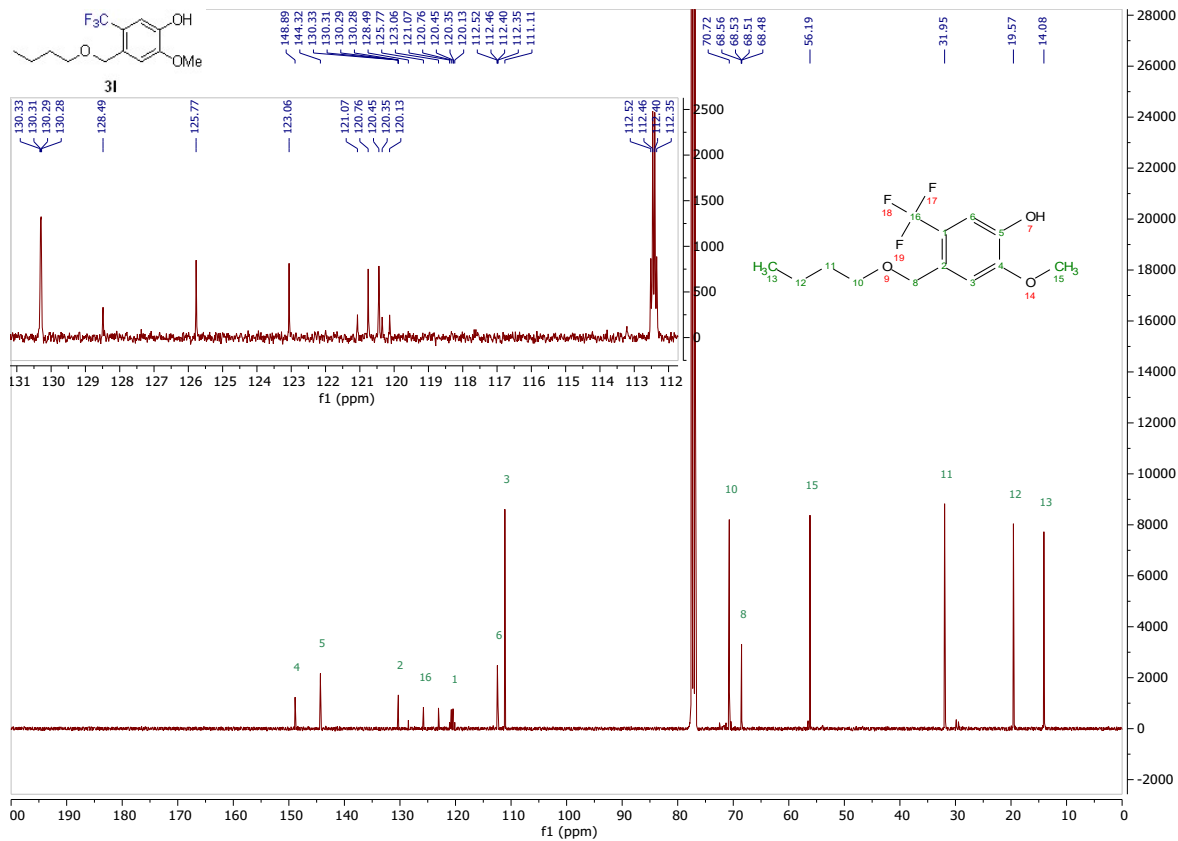

4-(butoxymethyl)-2-methoxy-5-(trifluoromethyl)phenol (3I), HSQC (CDCl<sub>3</sub>)

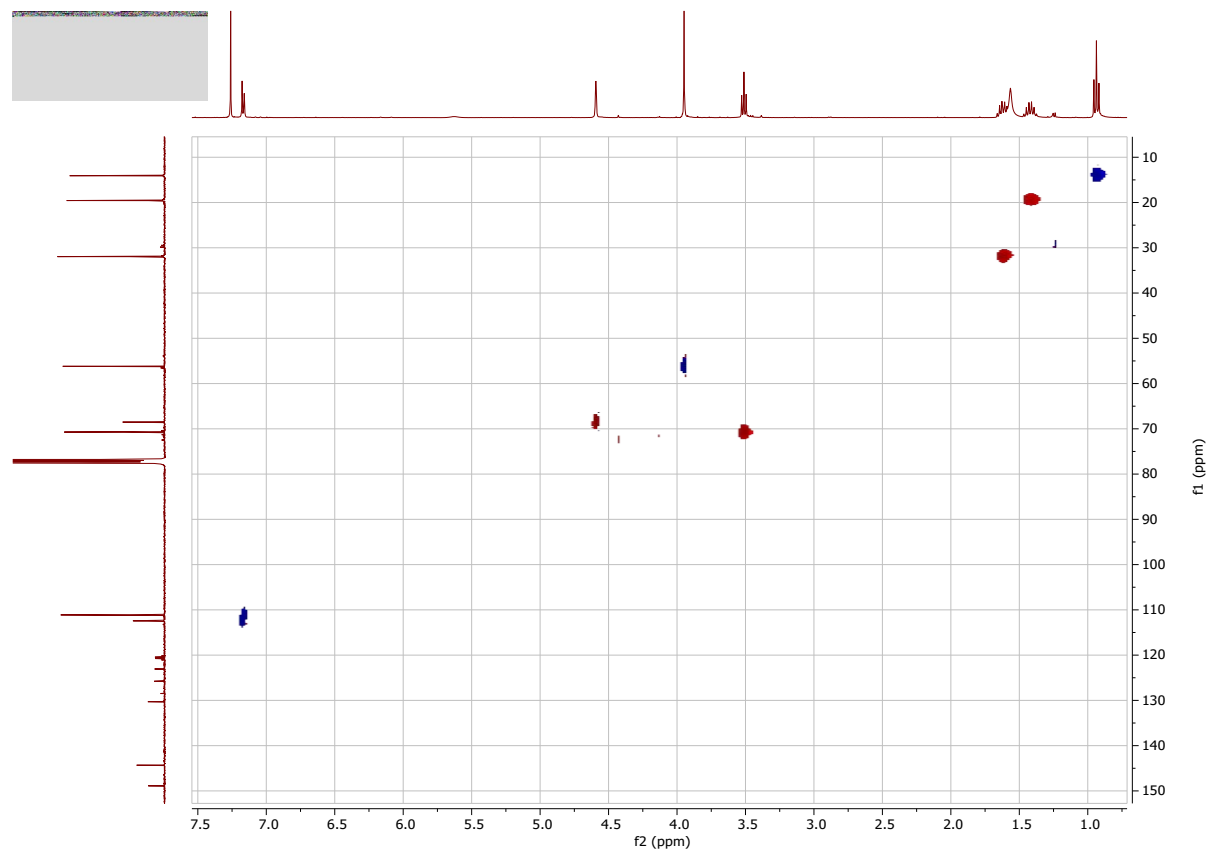

4-(butoxymethyl)-2-methoxy-5-(trifluoromethyl)phenol (3I), HMBC (CDCl<sub>3</sub>)

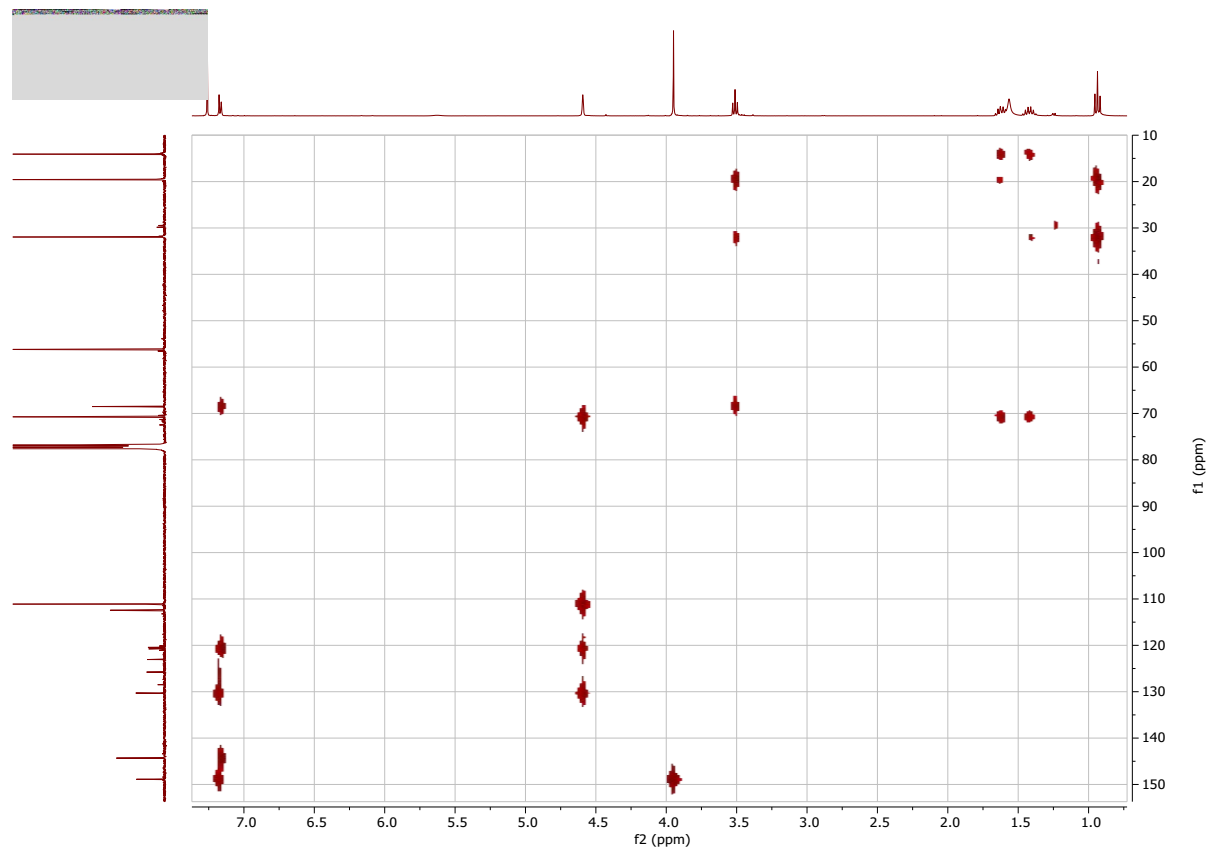

4-(butoxymethyl)-2-methoxy-5-(trifluoromethyl)phenol (3I),  $^{19}\text{F}$  NMR (376 MHz,  $\text{CDCl}_3$ )

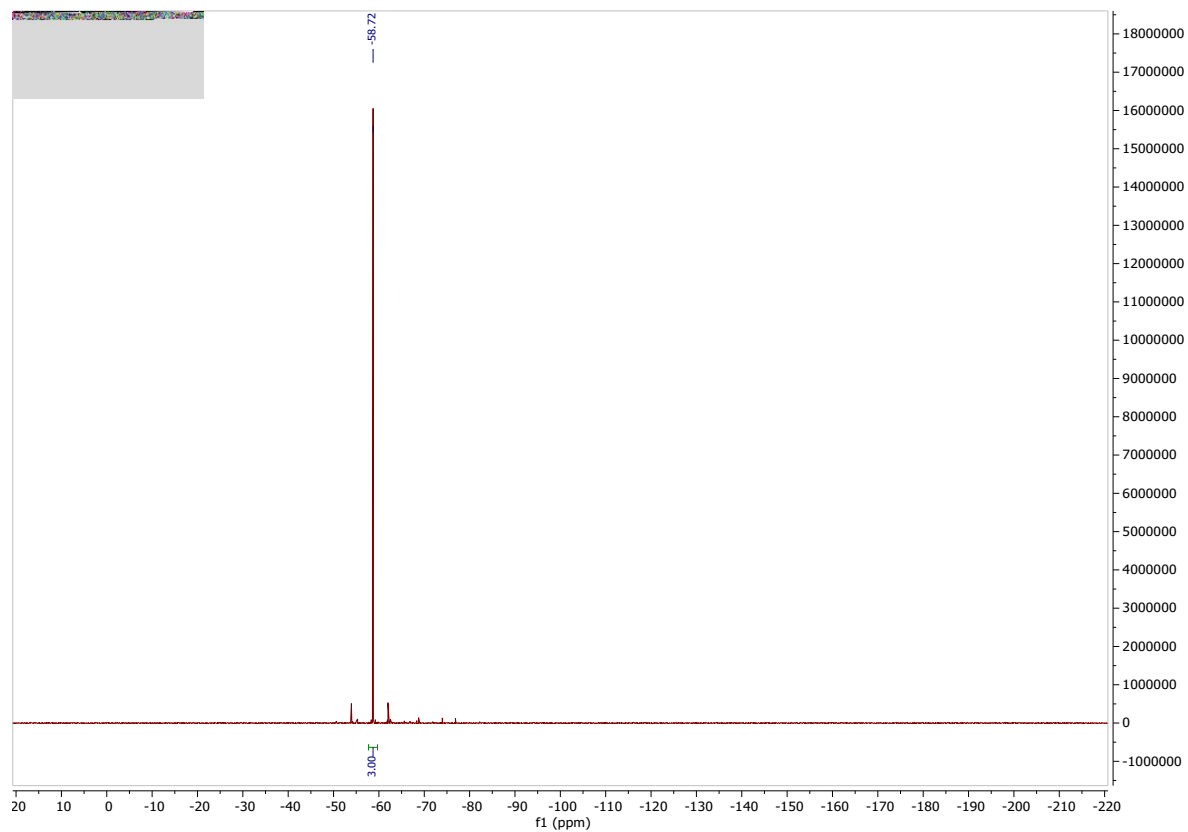

**4-(butoxymethyl)-2-methoxy-6-(trifluoromethyl)phenol : 4-(butoxymethyl)-6-methoxy-2,3-bis(trifluoromethyl)phenol (3I\*: 3I^ in the ratio of 1 : 0.2), <sup>1</sup>H NMR (400 MHz, CDCl<sub>3</sub>)**

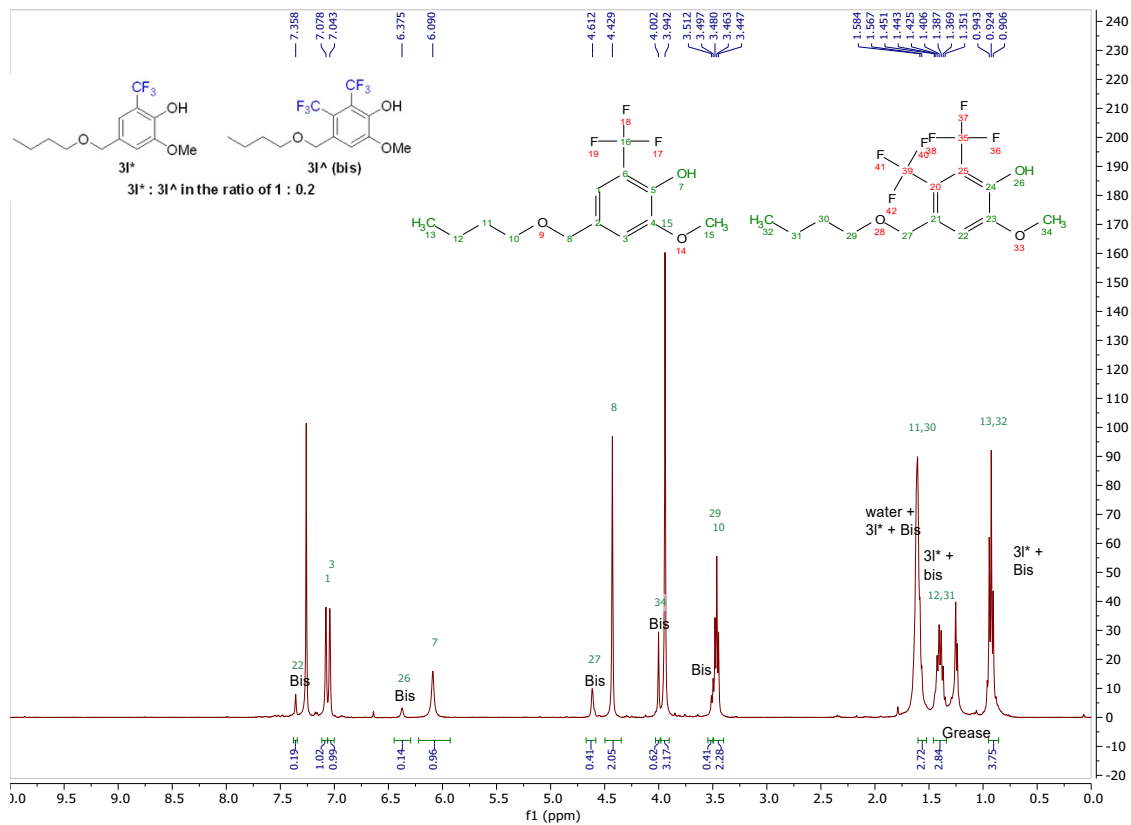

4(b)

**4-(butoxymethyl)-2-methoxy-6-(trifluoromethyl)phenol : 4-(butoxymethyl)-6-methoxy-2,3-bis(trifluoromethyl)phenol (3I\*: 3I^ in the ratio of 1 : 0.2), <sup>13</sup>C NMR (101 MHz, CDCl<sub>3</sub>)**

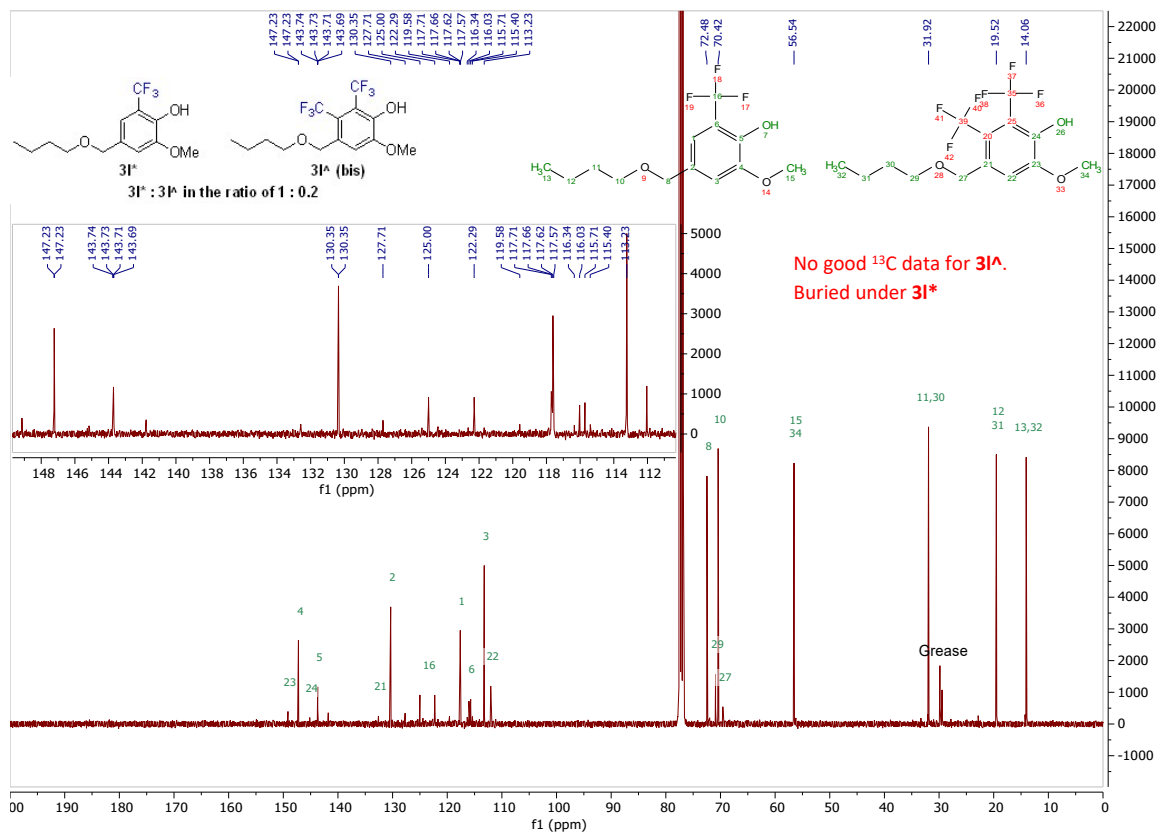

**4-(butoxymethyl)-2-methoxy-6-(trifluoromethyl)phenol : 4-(butoxymethyl)-6-methoxy-2,3-bis(trifluoromethyl)phenol (3I\*: 3I^ in the ratio of 1 : 0.2), HSQC (CDCl<sub>3</sub>)**

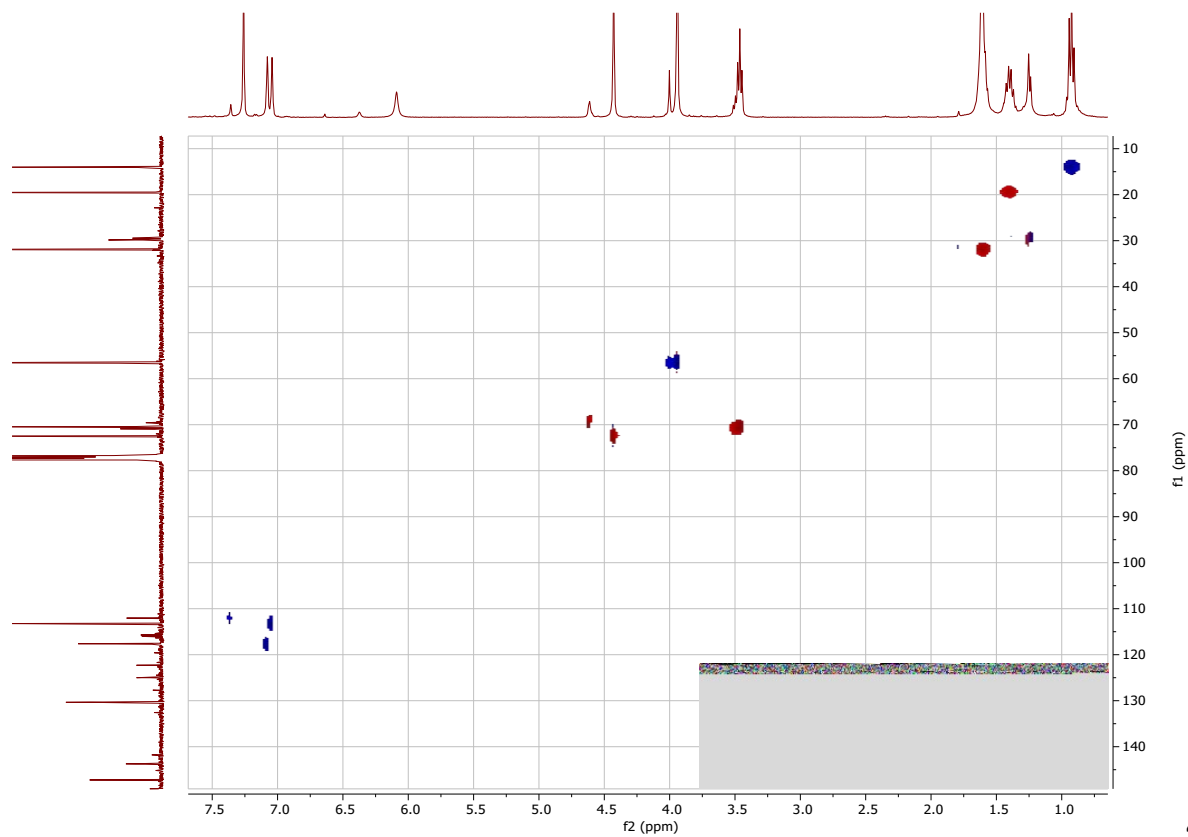

4-

**(butoxymethyl)-2-methoxy-6-(trifluoromethyl)phenol : 4-(butoxymethyl)-6-methoxy-2,3-bis(trifluoromethyl)phenol (3I\*: 3I^ in the ratio of 1 : 0.2), HMBC (CDCl<sub>3</sub>)**

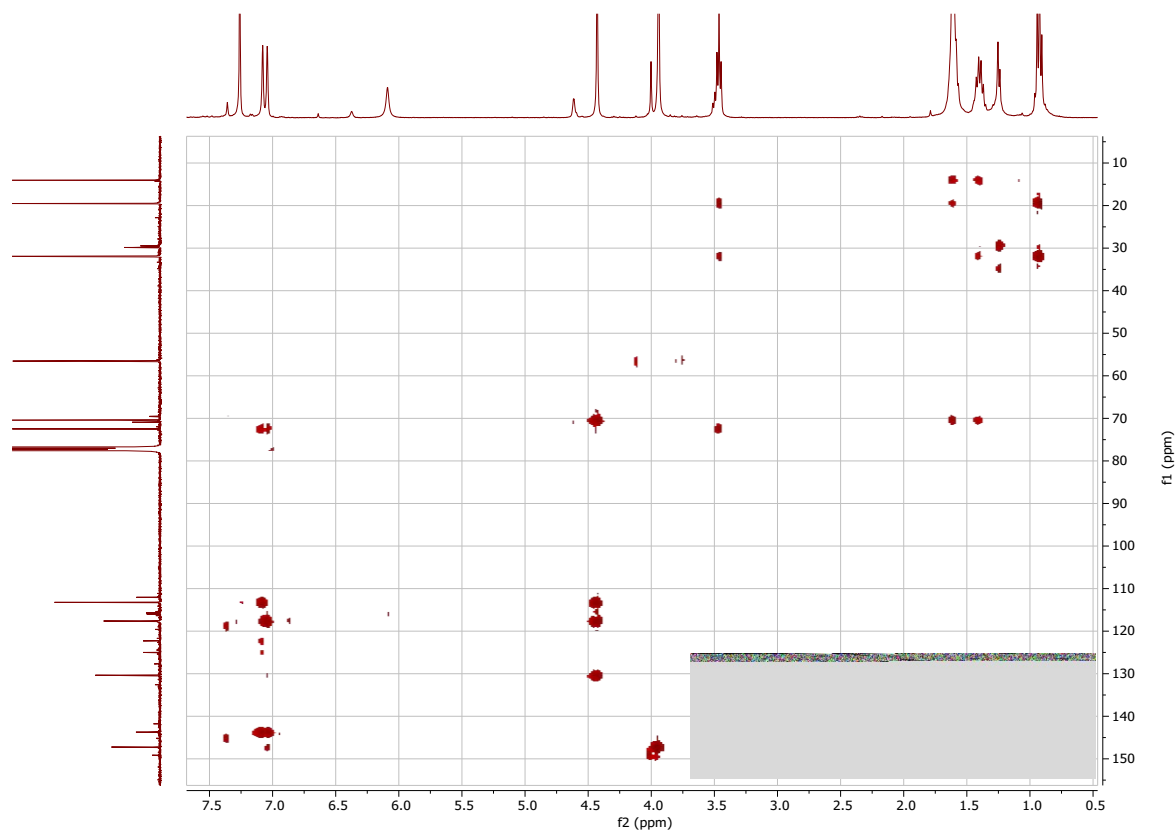

**4-(butoxymethyl)-2-methoxy-6-(trifluoromethyl)phenol : 4-(butoxymethyl)-6-methoxy-2,3-bis(trifluoromethyl)phenol (3I\*: 3I^ in the ratio of 1 : 0.2), <sup>19</sup>F NMR (376 MHz, CDCl<sub>3</sub>)**

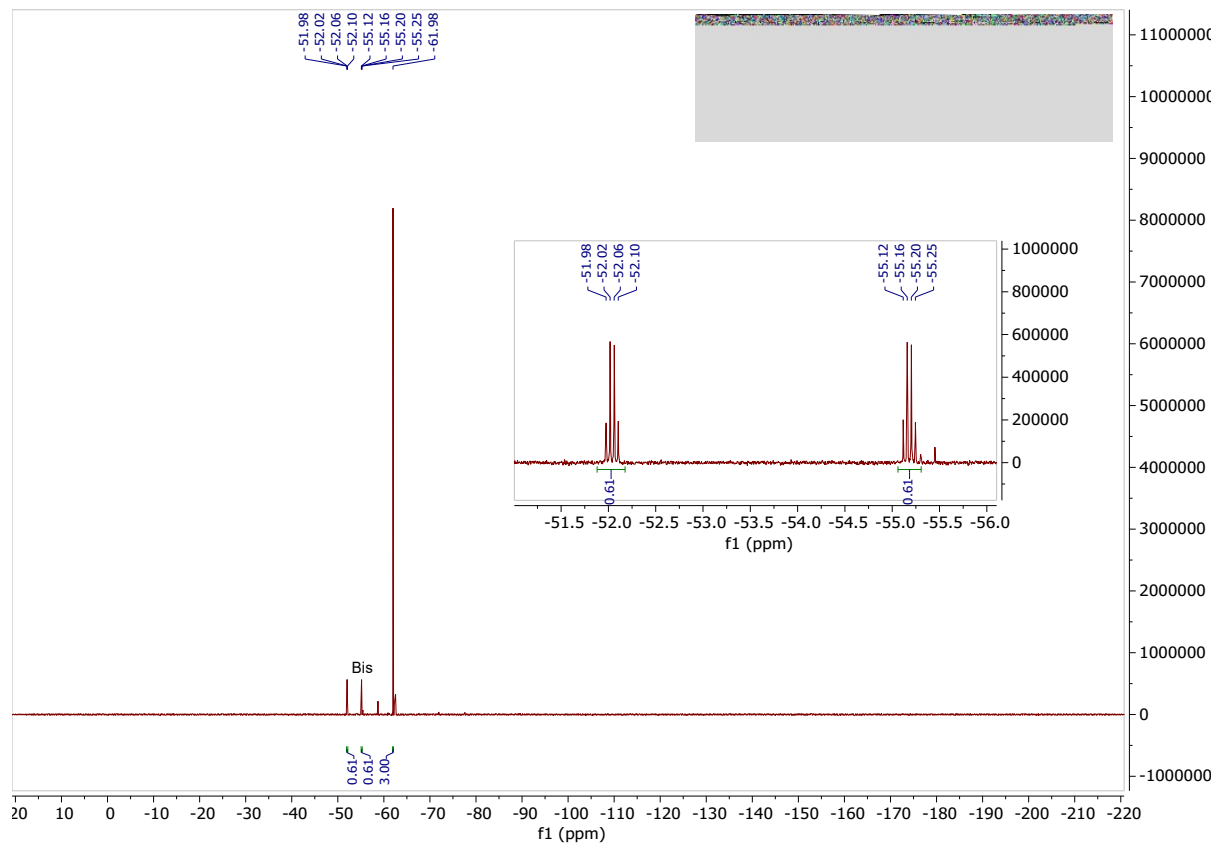

2-hydroxy-4-methoxy-3-(trifluoromethyl)benzoic acid (3m), <sup>1</sup>H NMR (400 MHz, CD<sub>3</sub>OD)

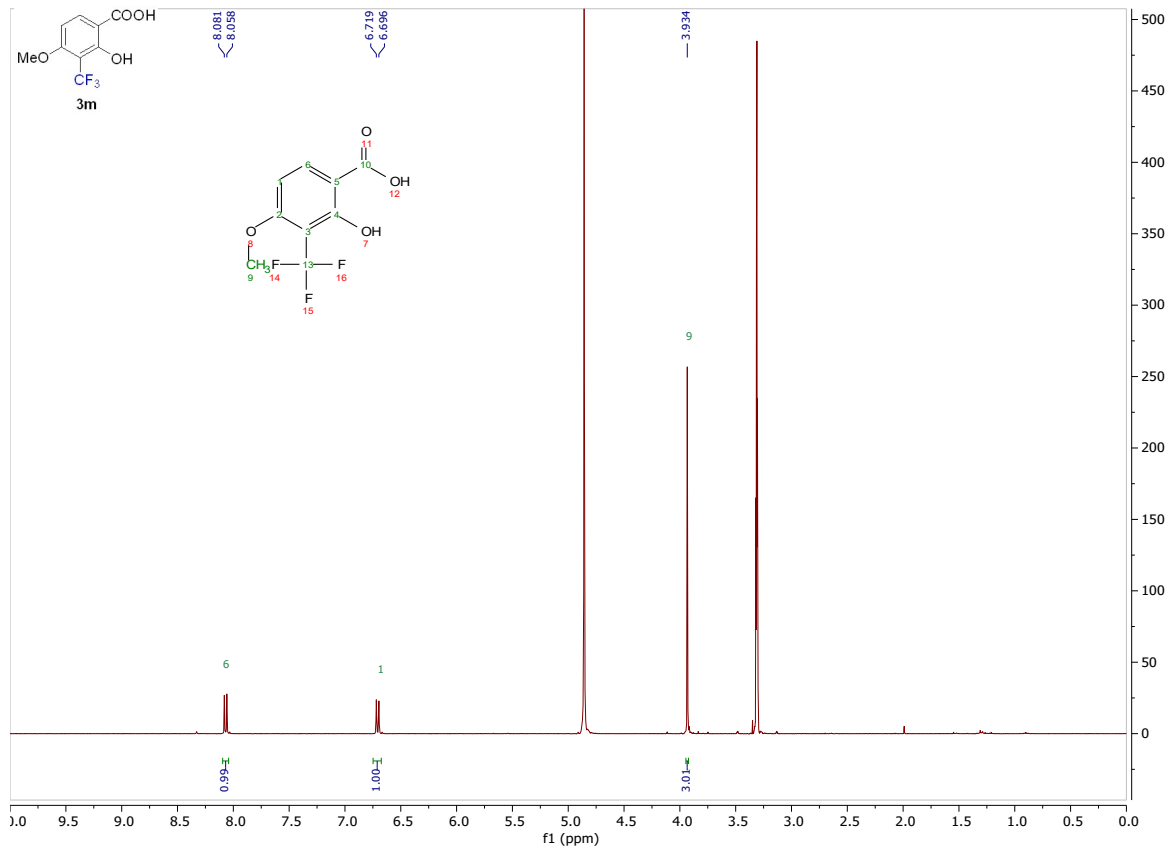

2-hydroxy-4-methoxy-3-(trifluoromethyl)benzoic acid (3m), <sup>13</sup>C NMR (101 MHz, CD<sub>3</sub>OD)

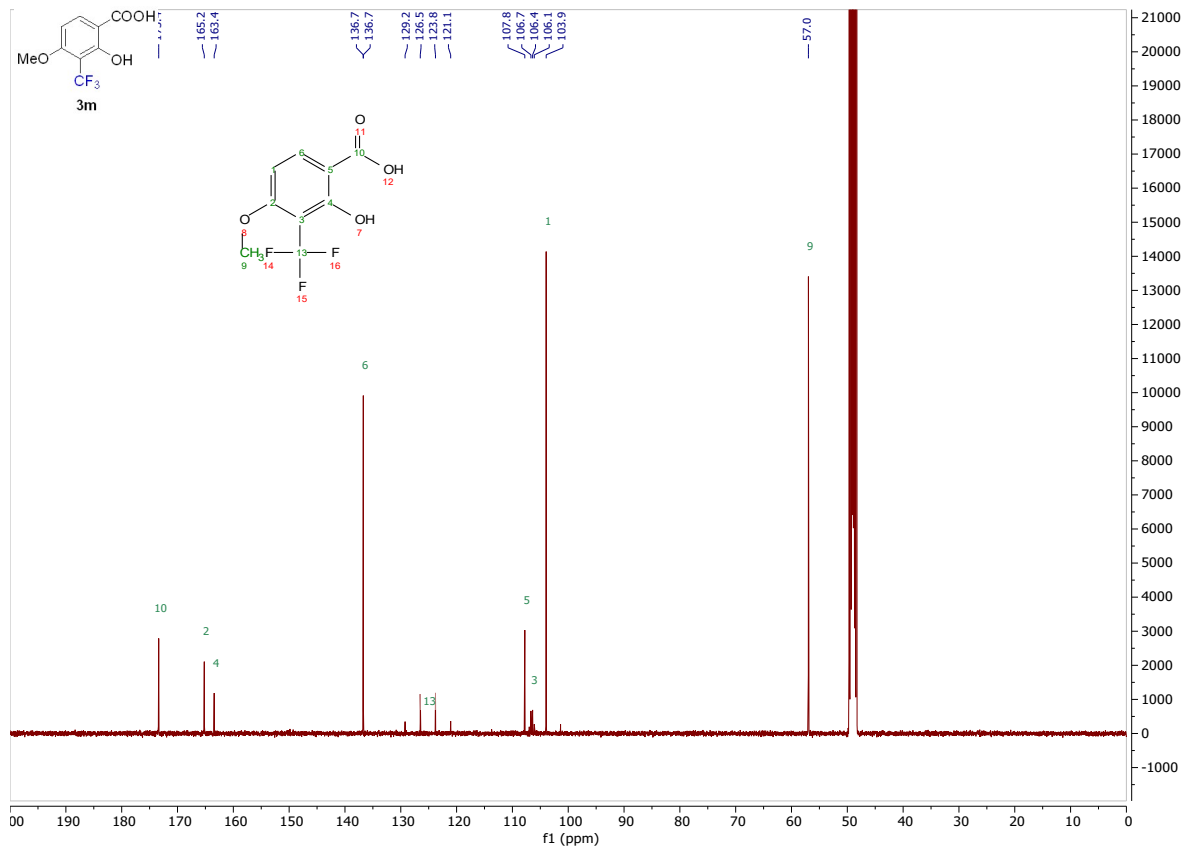

2-hydroxy-4-methoxy-3-(trifluoromethyl)benzoic acid (3m), HSQC (CD<sub>3</sub>OD)

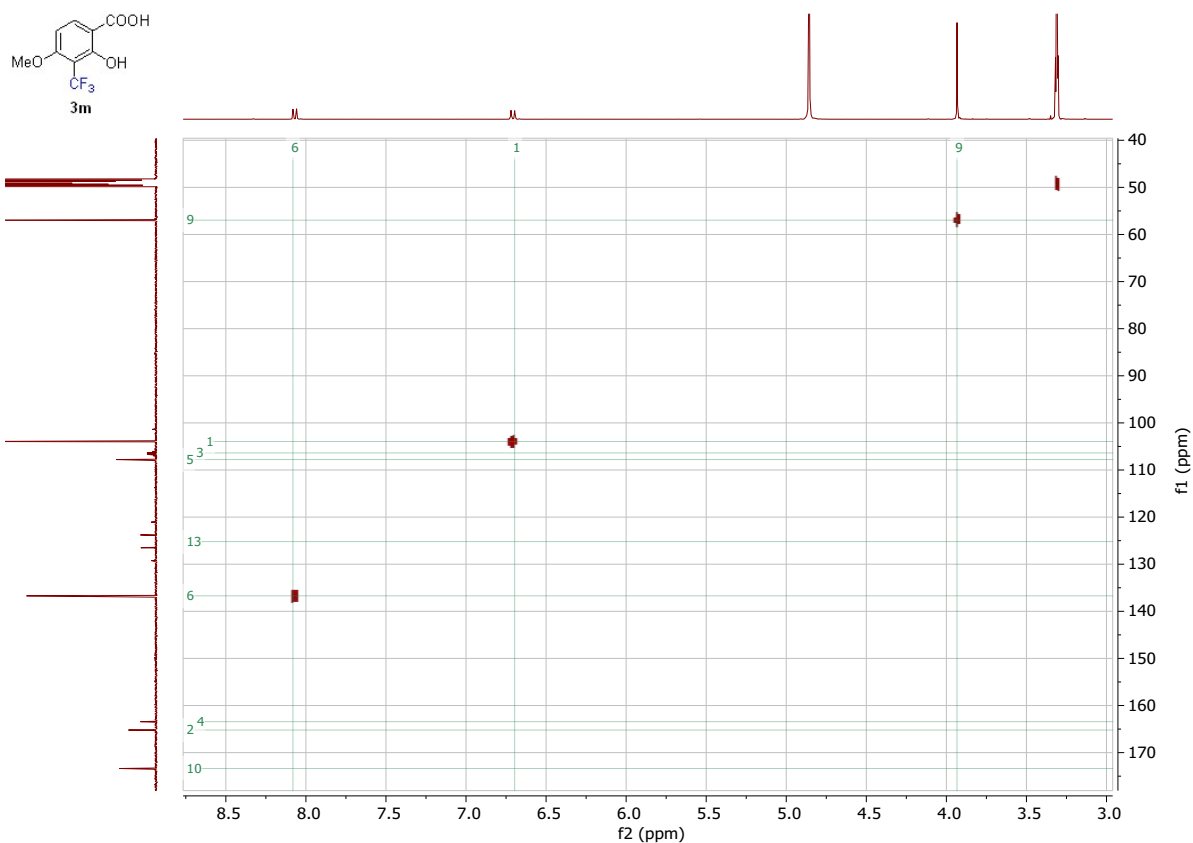

2-hydroxy-4-methoxy-3-(trifluoromethyl)benzoic acid (3m), HMBC (CD<sub>3</sub>OD)

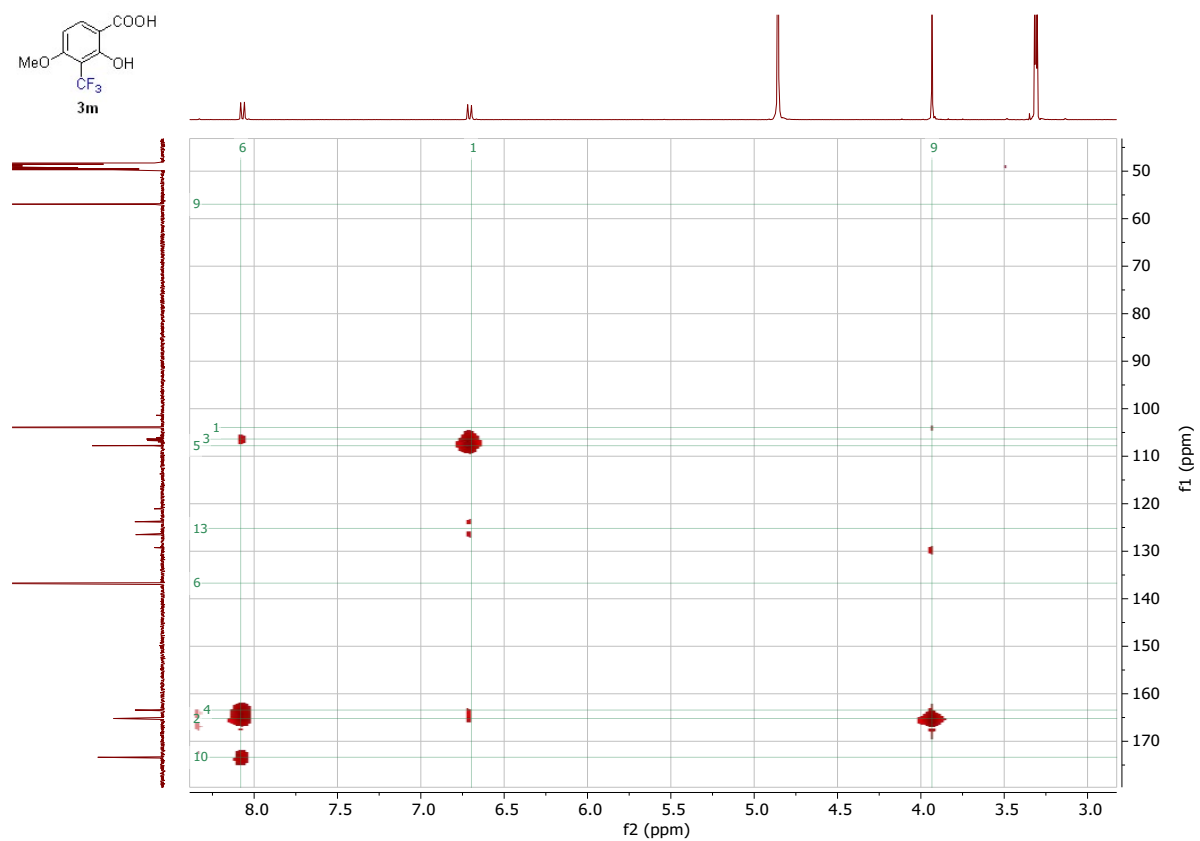



2-hydroxy-4-methoxy-3-(trifluoromethyl)benzoic acid (3m), <sup>19</sup>F NMR (376 MHz, CD<sub>3</sub>OD)

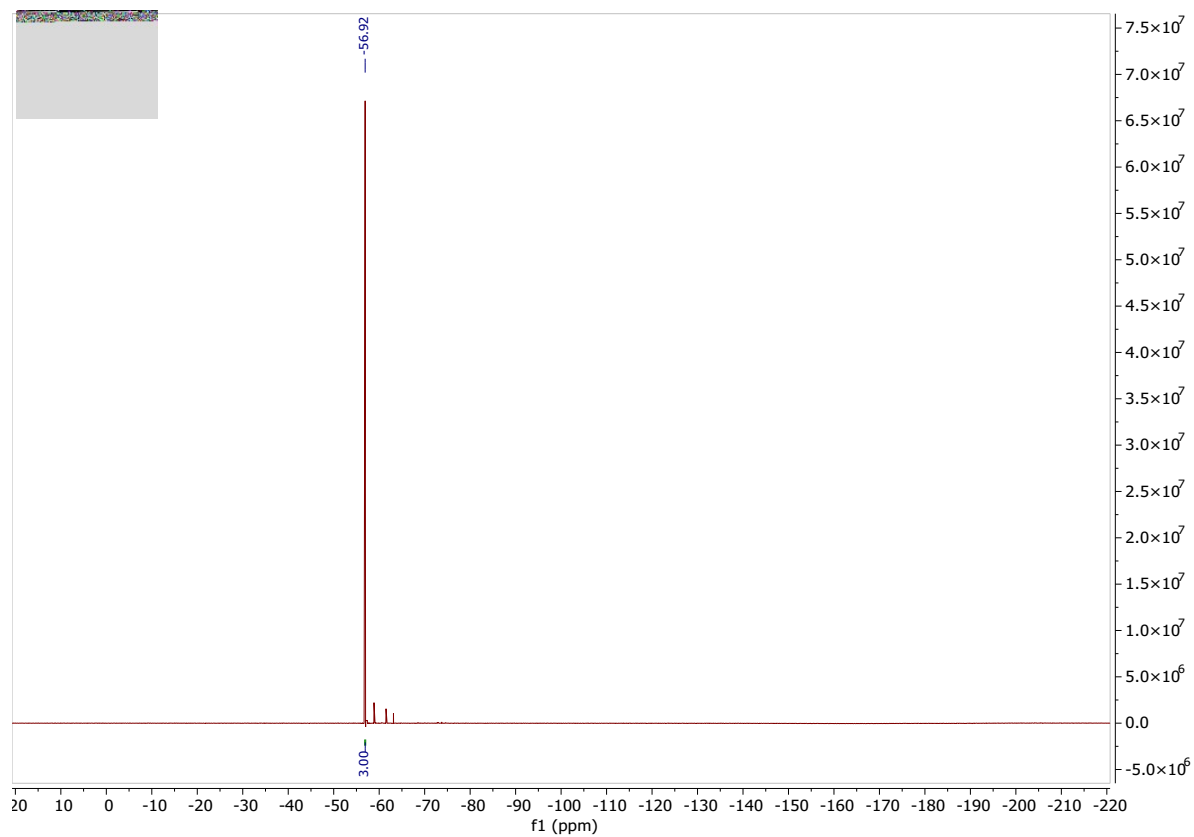

**2-hydroxy-4-methoxy-3-(trifluoromethyl)benzoic acid : 2-hydroxy-4-methoxy-3,5-bis(trifluoromethyl)benzoic acid (3m: 3m<sup>^</sup> in ratio of 1 : 0.13), <sup>1</sup>H NMR (400 MHz, CD<sub>3</sub>OD)**

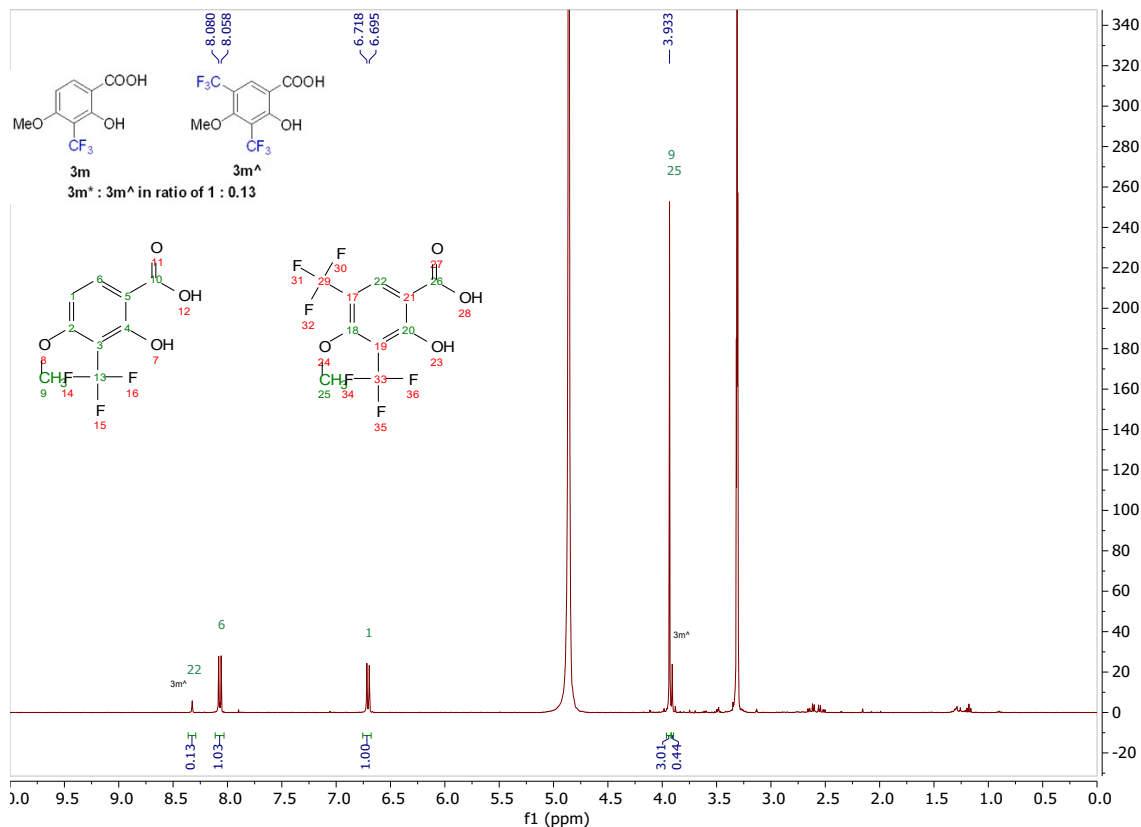

**2-hydroxy-4-methoxy-3-(trifluoromethyl)benzoic acid : 2-hydroxy-4-methoxy-3,5-bis(trifluoromethyl)benzoic acid (3m: 3m<sup>^</sup> in ratio of 1 : 0.13), <sup>13</sup>C NMR (101 MHz, CD<sub>3</sub>OD)**

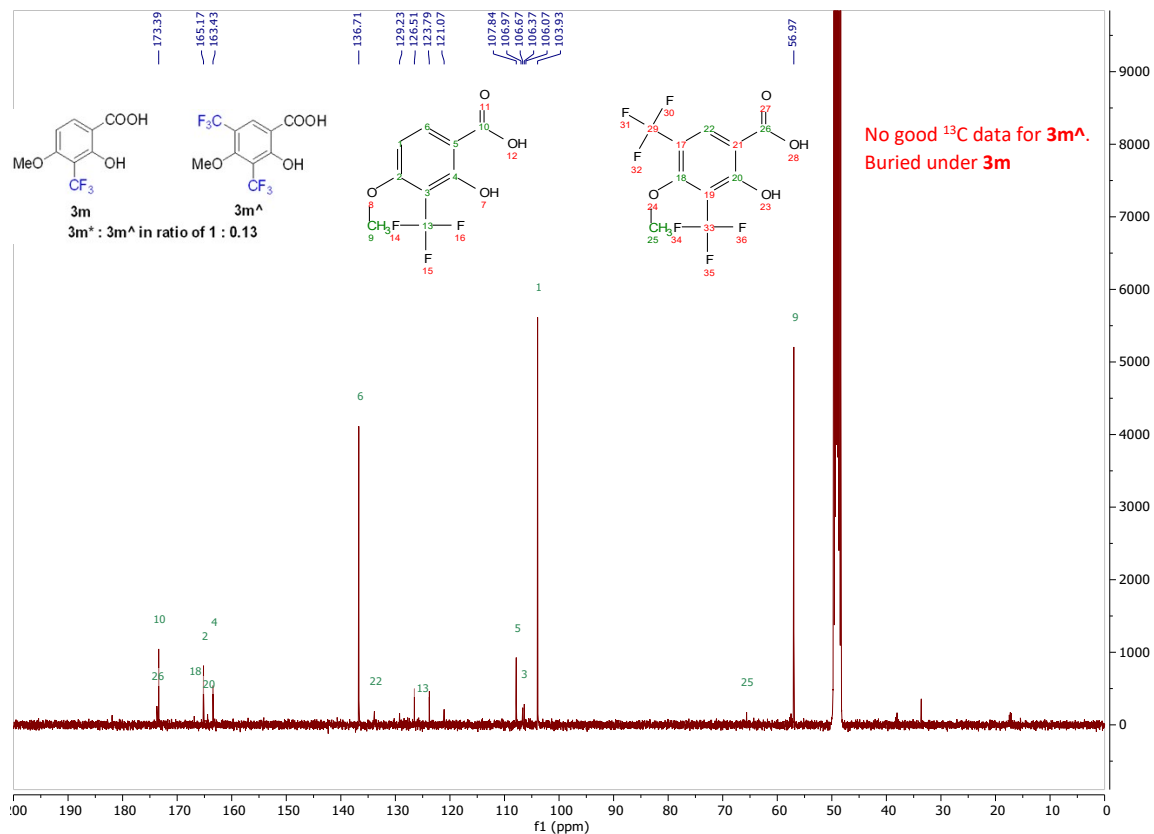

**2-hydroxy-4-methoxy-3-(trifluoromethyl)benzoic acid : 2-hydroxy-4-methoxy-3,5-bis(trifluoromethyl)benzoic acid (3m: 3m<sup>^</sup> in ratio of 1 : 0.13), HSQC (CD<sub>3</sub>OD)**

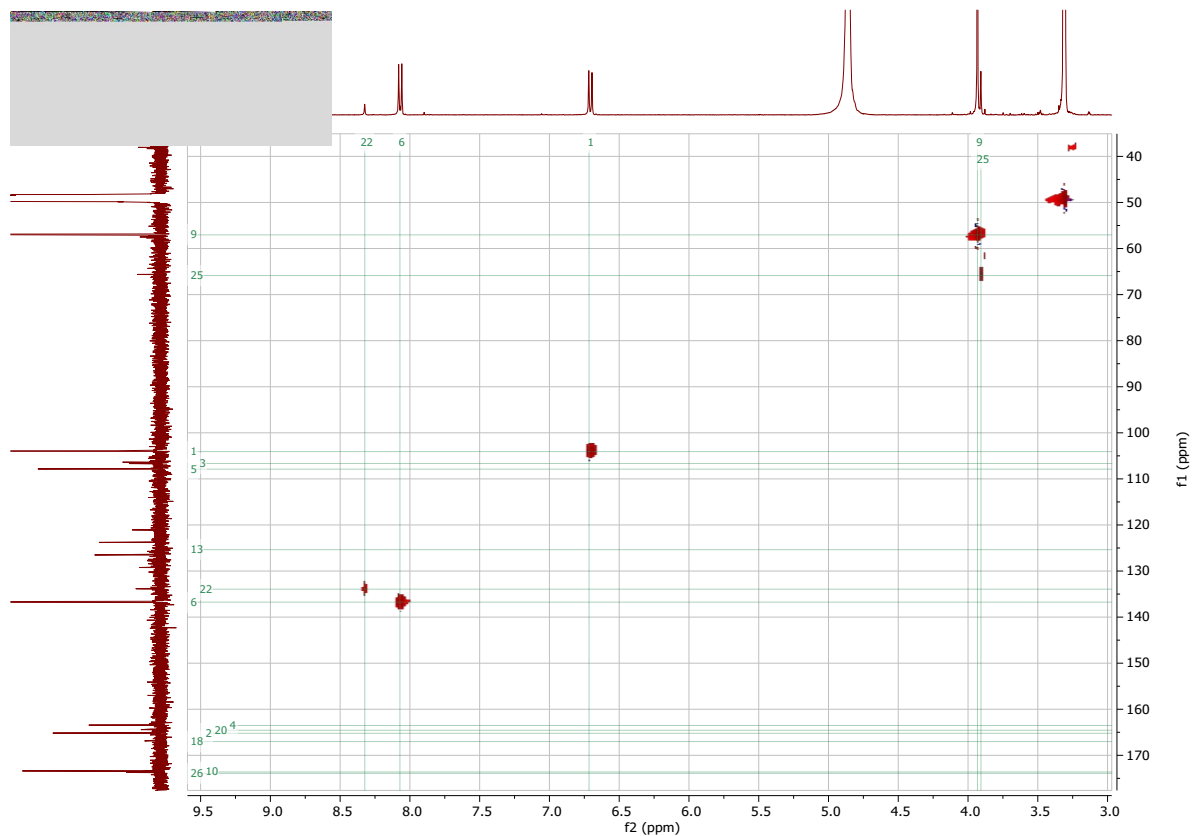

**2-hydroxy-4-methoxy-3-(trifluoromethyl)benzoic acid : 2-hydroxy-4-methoxy-3,5-bis(trifluoromethyl)benzoic acid (3m: 3m<sup>^</sup> in ratio of 1 : 0.13), HMBC (CD<sub>3</sub>OD)**

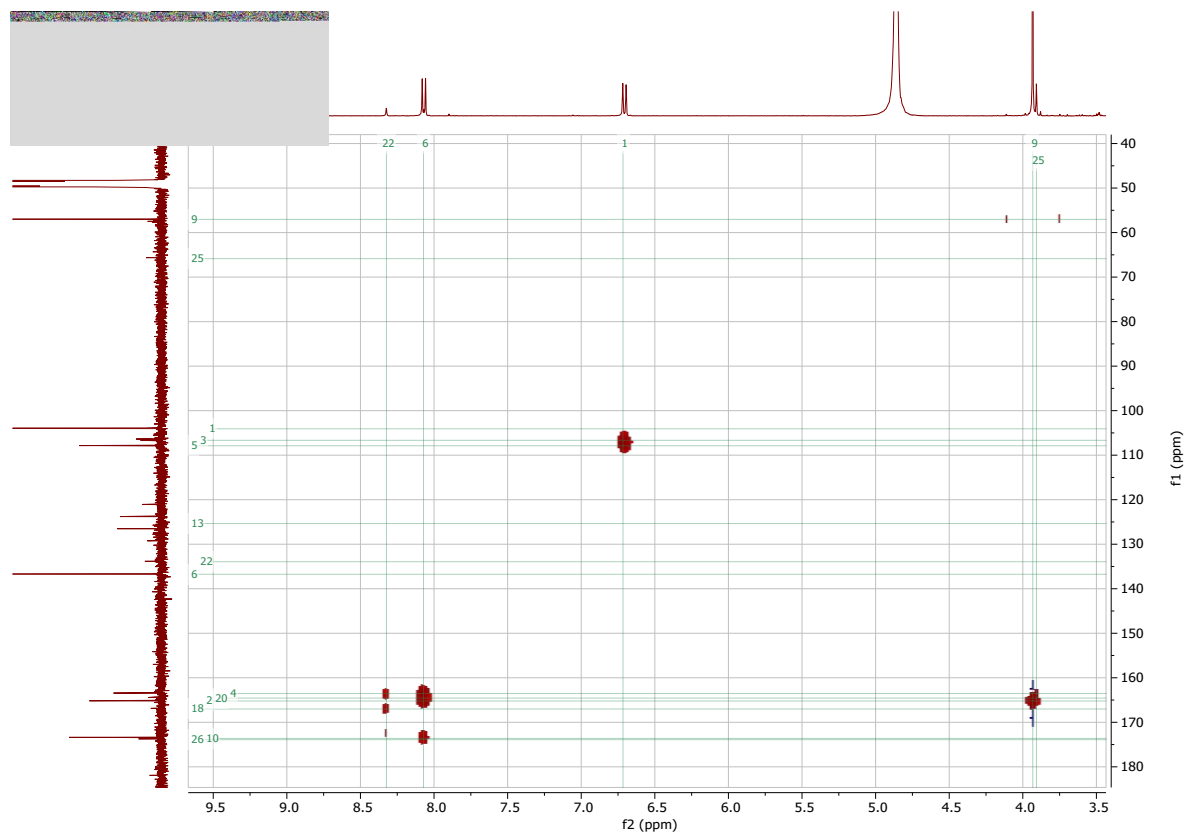

**2-hydroxy-4-methoxy-3-(trifluoromethyl)benzoic acid : 2-hydroxy-4-methoxy-3,5-bis(trifluoromethyl)benzoic acid (3m: 3m<sup>^</sup> in ratio of 1 : 0.13), <sup>19</sup>F NMR (376 MHz, CD<sub>3</sub>OD)**

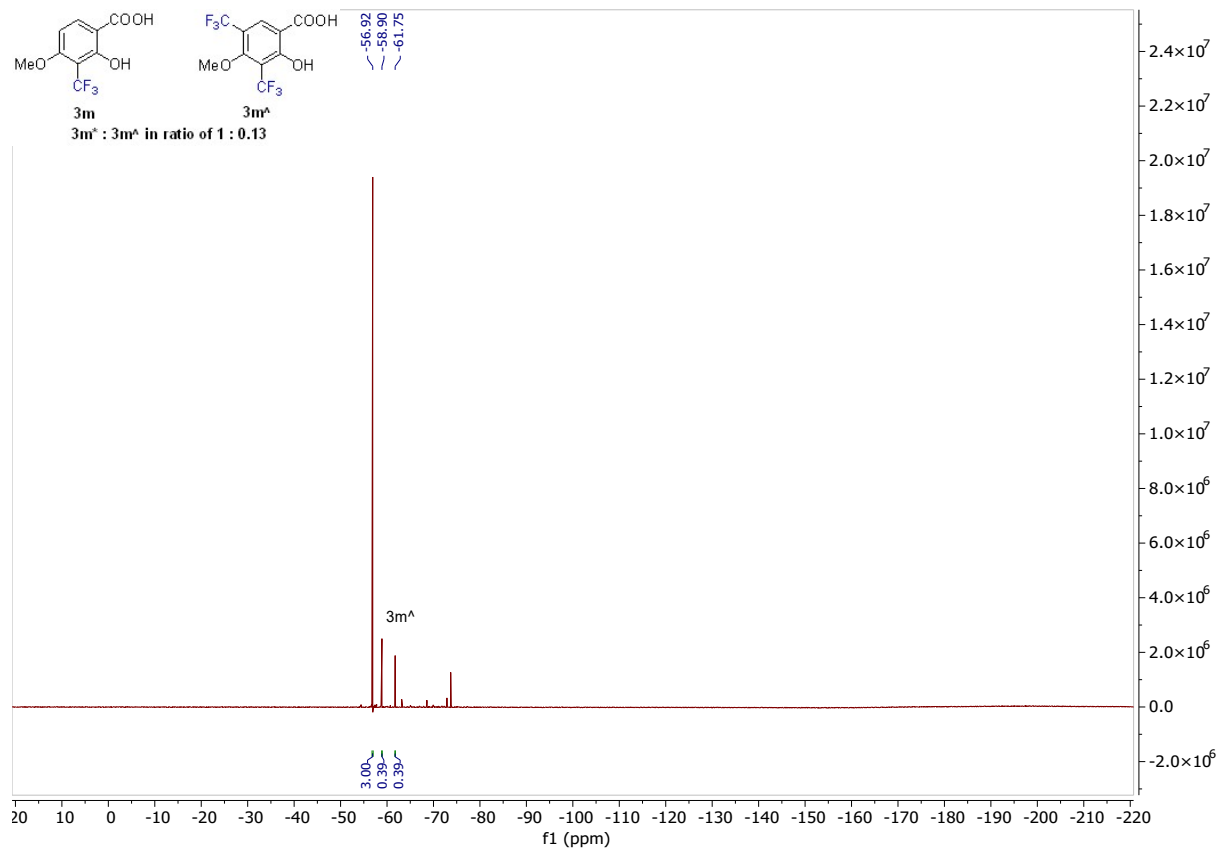

**2-hydroxy-4-methoxy-5-(trifluoromethyl)benzoic acid (3m\*), <sup>1</sup>H NMR (400 MHz, CD<sub>3</sub>OD)**

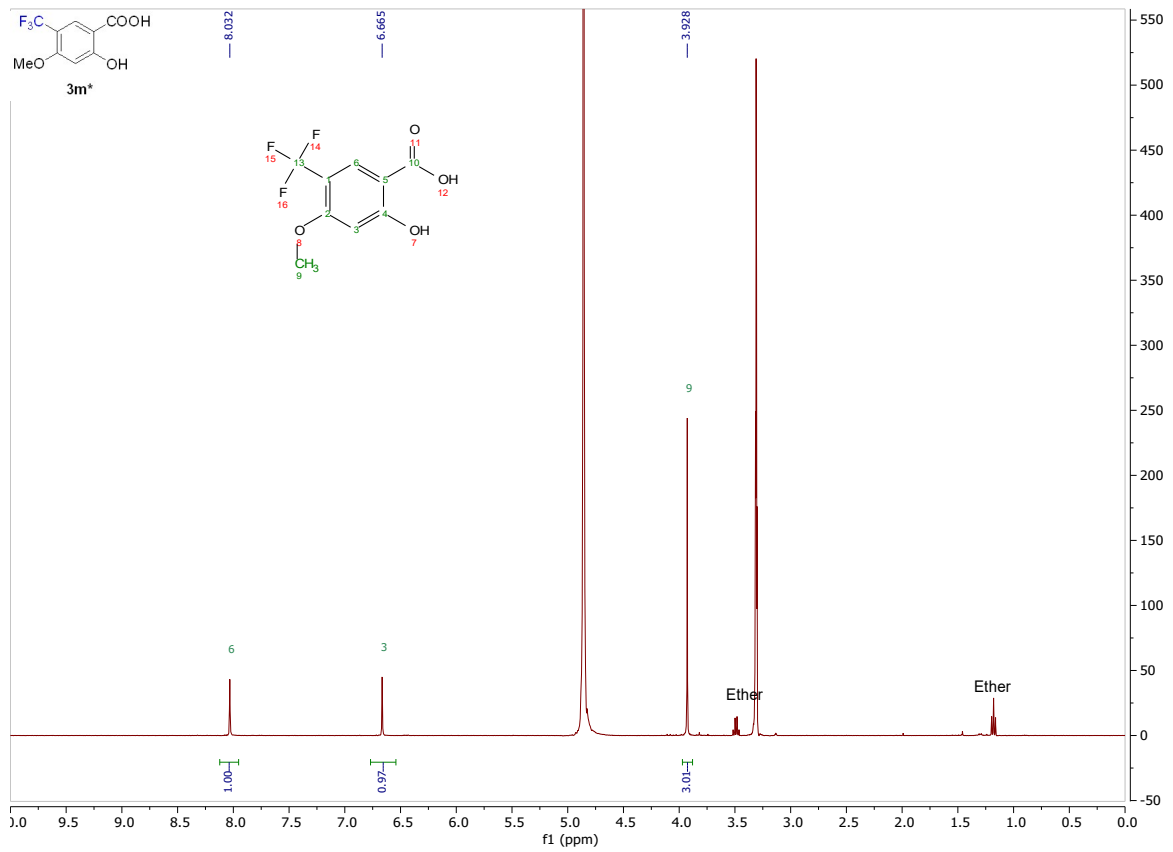

**2-hydroxy-4-methoxy-5-(trifluoromethyl)benzoic acid (3m\*), <sup>13</sup>C NMR (101 MHz, CD<sub>3</sub>OD)**

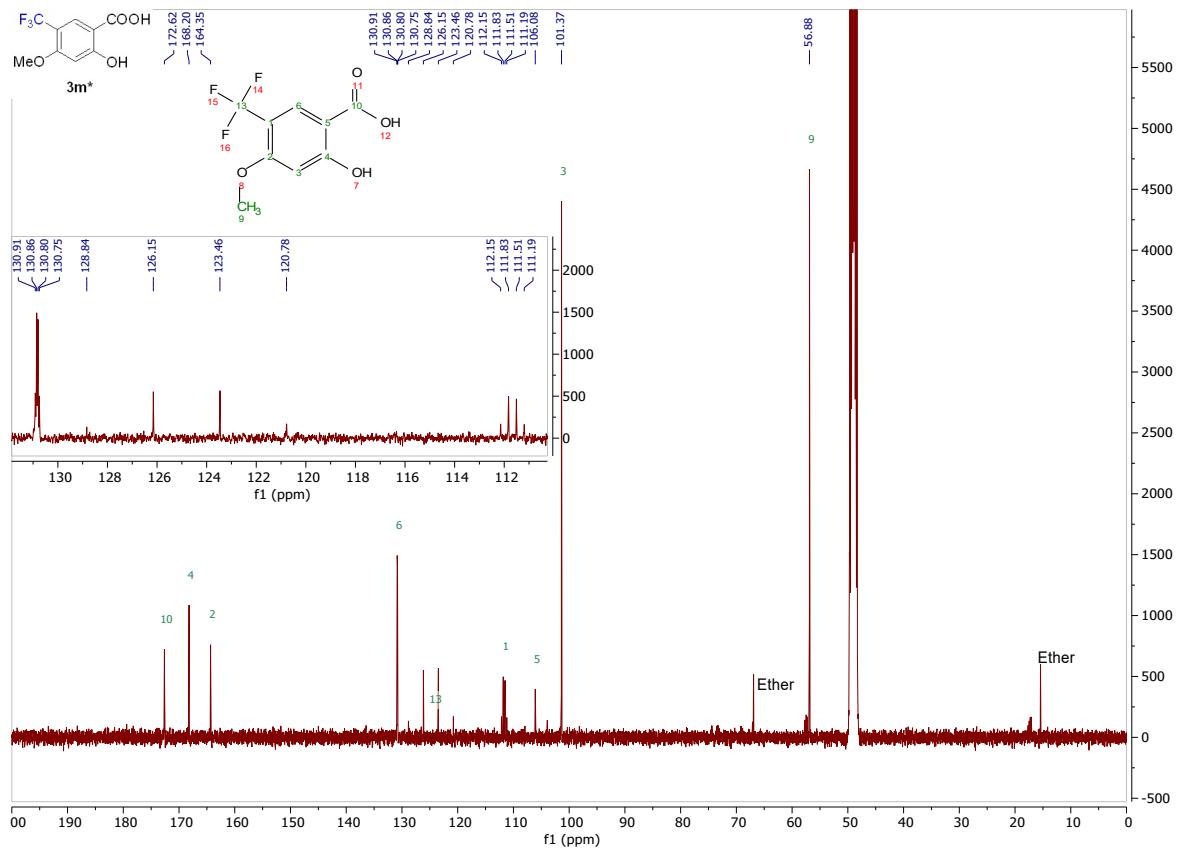

2-hydroxy-4-methoxy-5-(trifluoromethyl)benzoic acid (3m\*), HSQC (CD<sub>3</sub>OD)

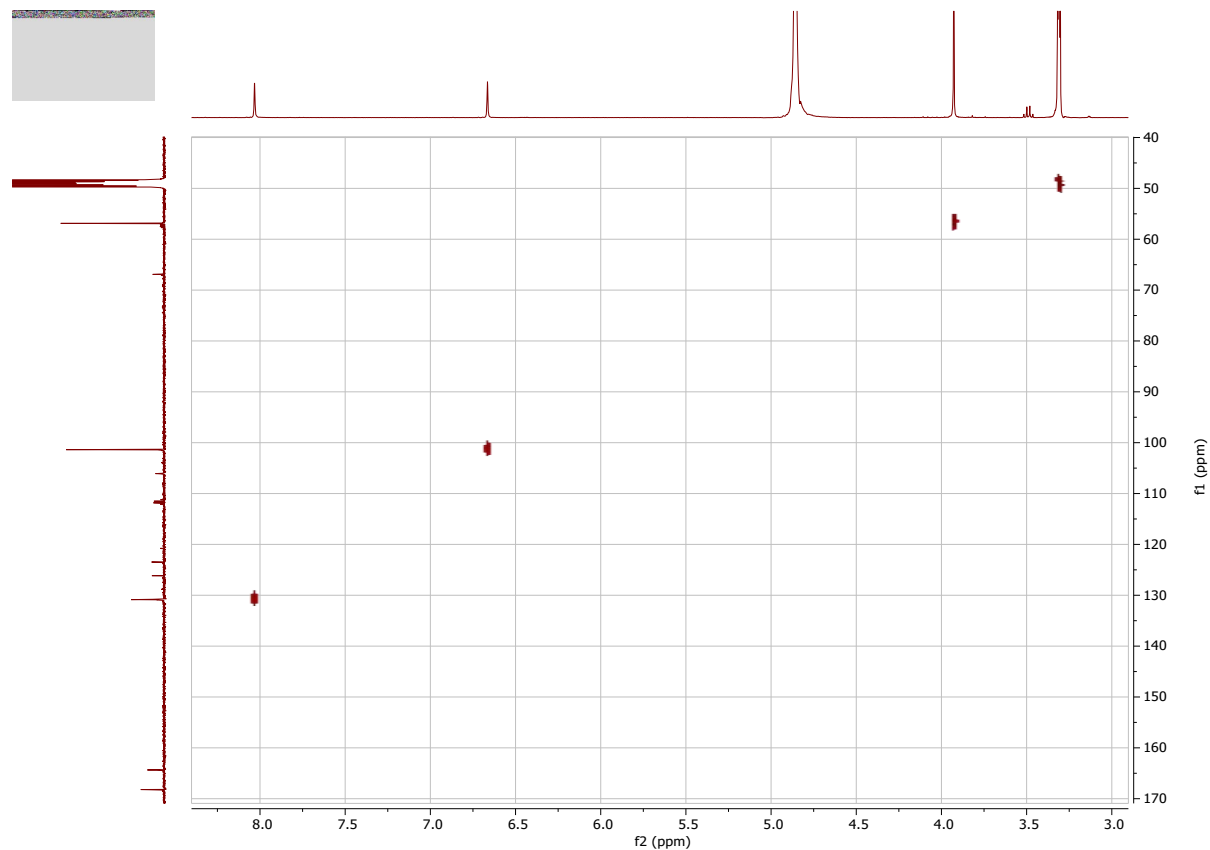

22-hydroxy-4-methoxy-5-(trifluoromethyl)benzoic acid (3m\*), HMBC (CD<sub>3</sub>OD)

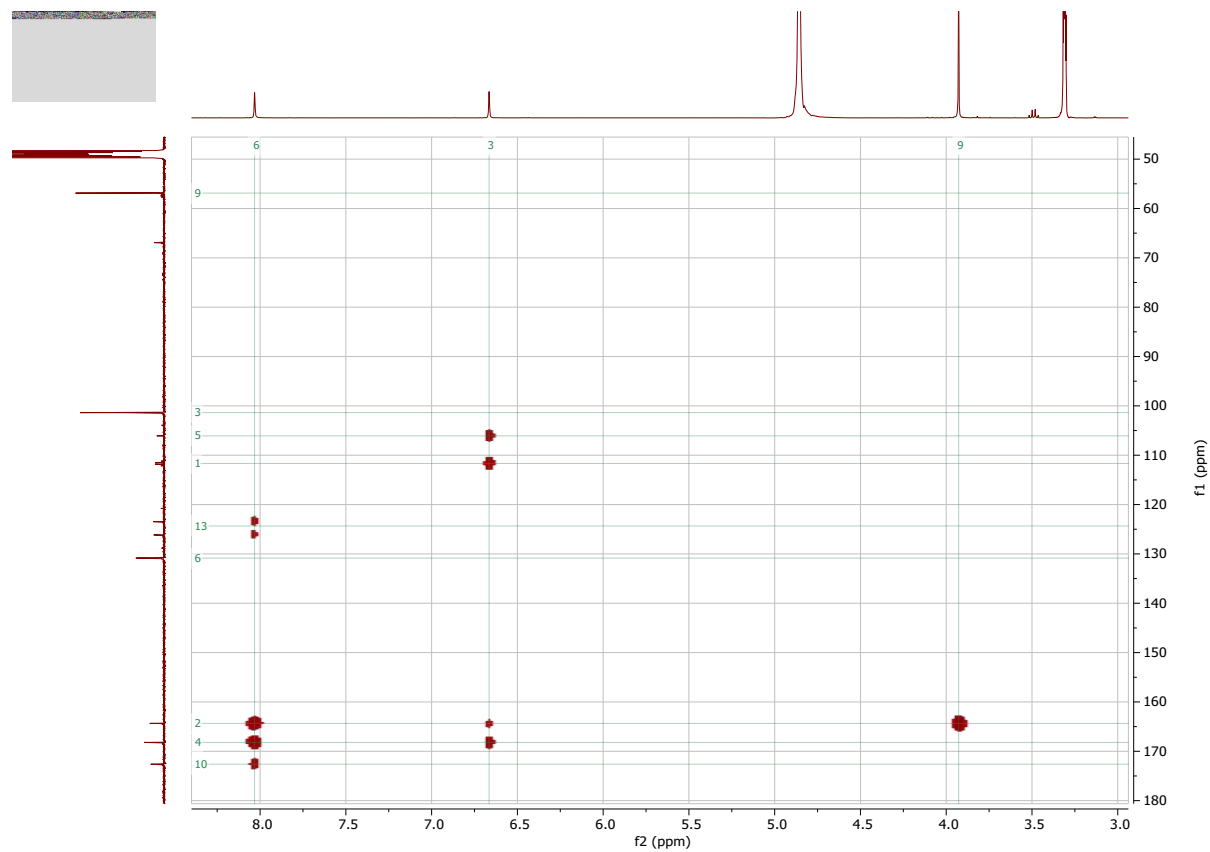

2-hydroxy-4-methoxy-5-(trifluoromethyl)benzoic acid (3m\*), <sup>19</sup>F NMR (376 MHz, CD<sub>3</sub>OD)

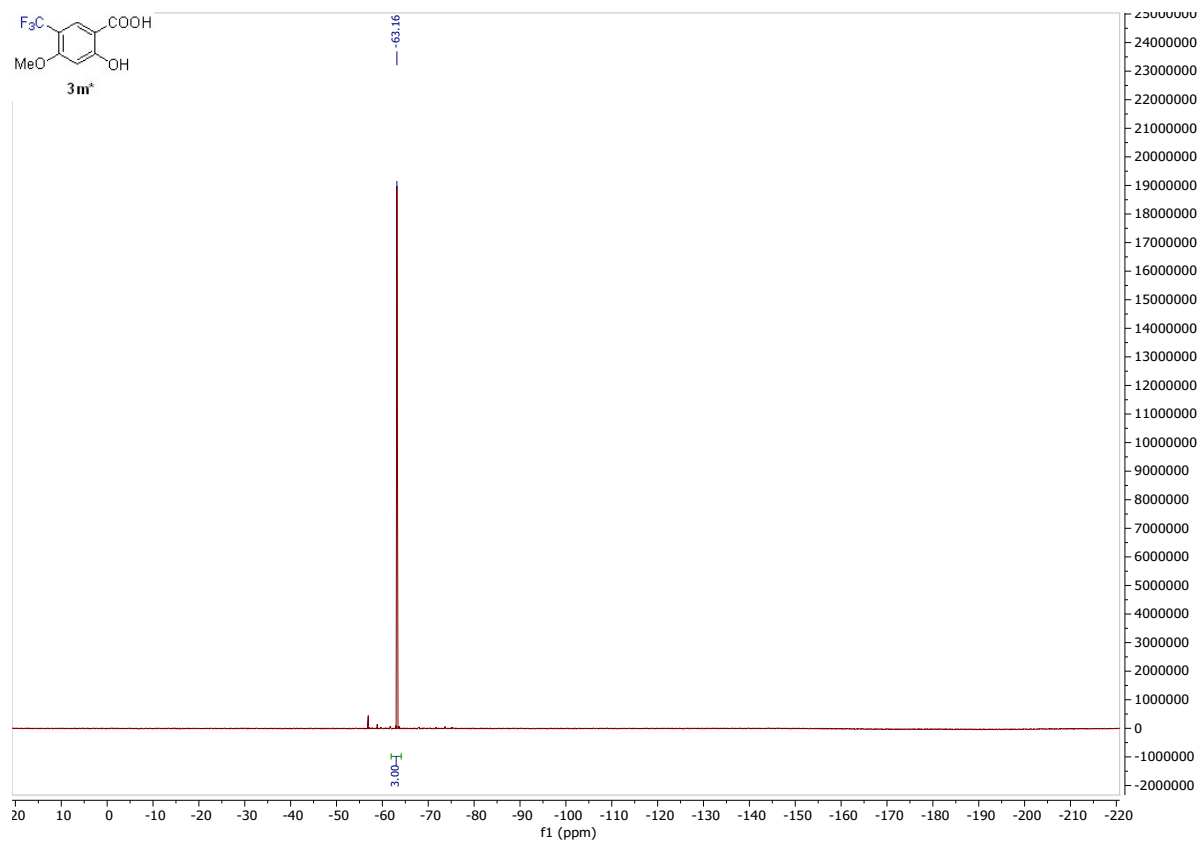

**4,6-dimethoxy-2-methyl-3-(trifluoromethyl)benzoic acid (3n), <sup>1</sup>H NMR (400 MHz, CD<sub>3</sub>OD)**

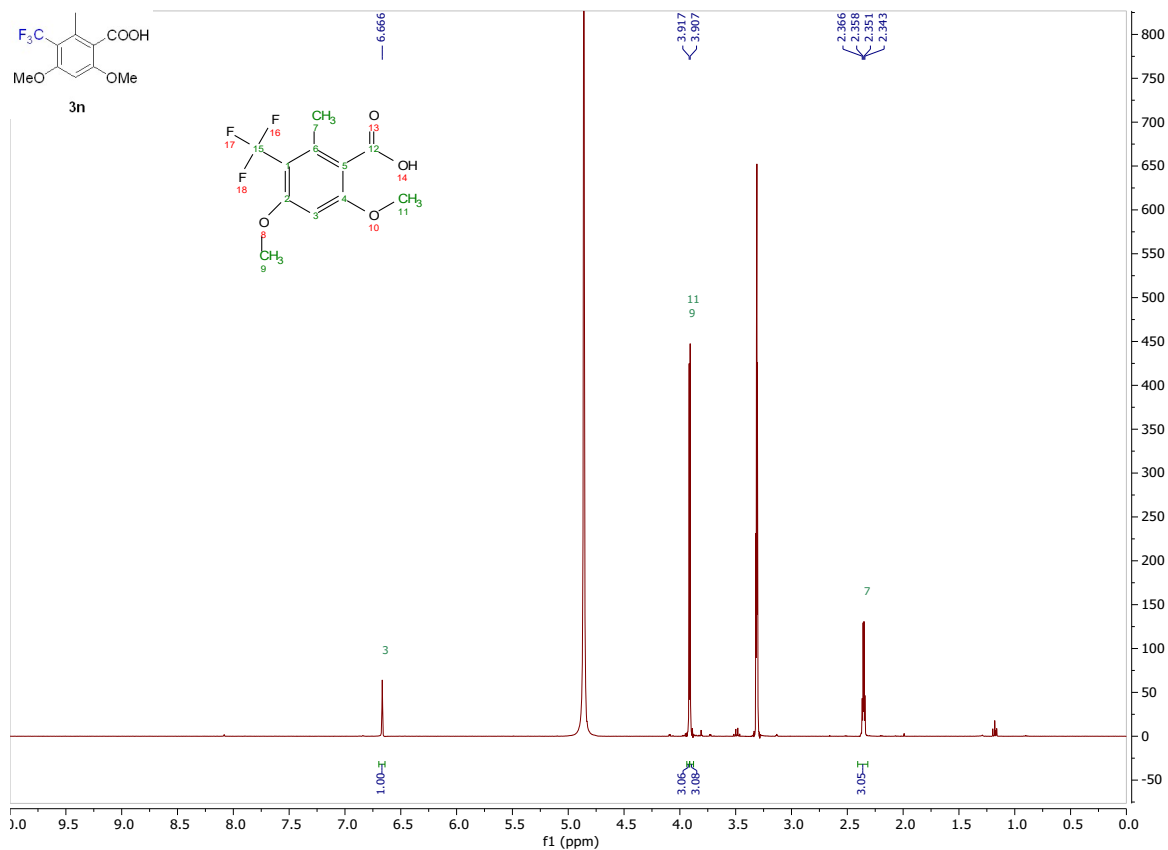

**4,6-dimethoxy-2-methyl-3-(trifluoromethyl)benzoic acid (3n), <sup>13</sup>C NMR (101 MHz, CD<sub>3</sub>OD)**

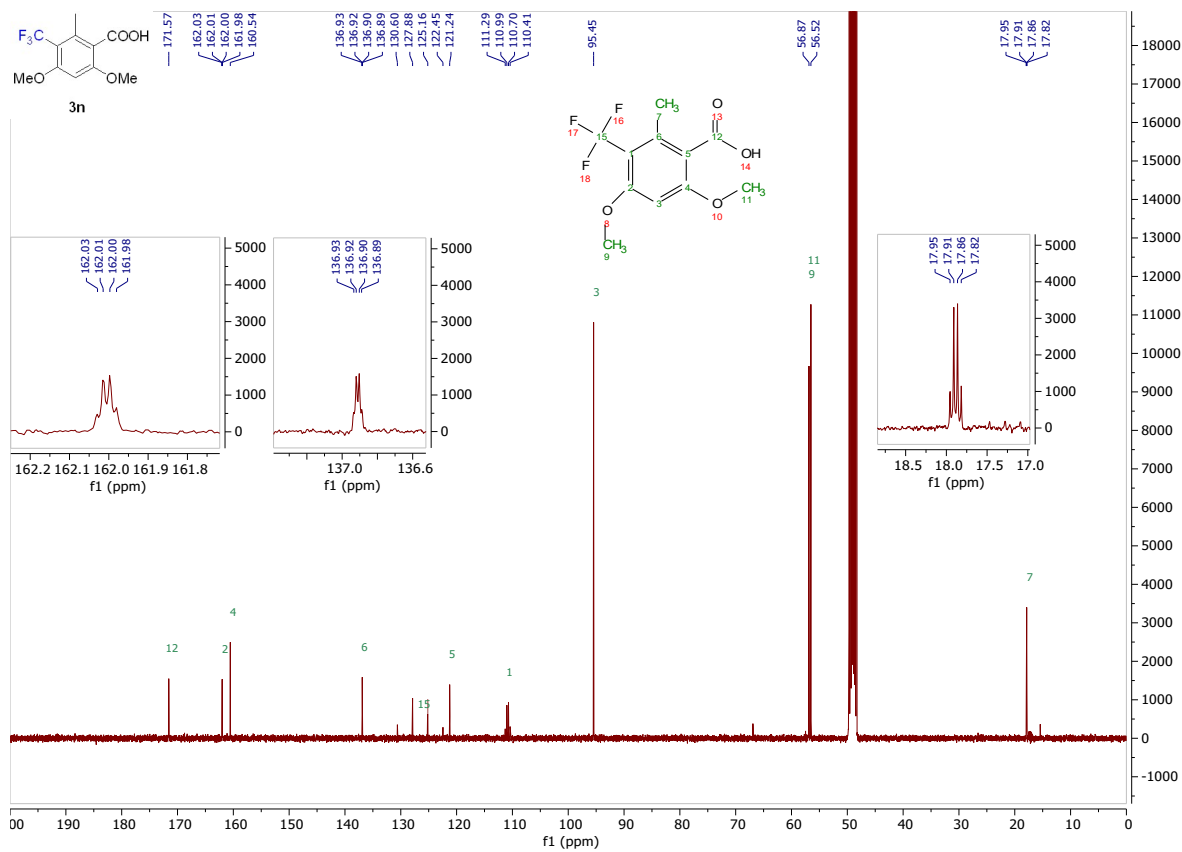



4,6-dimethoxy-2-methyl-3-(trifluoromethyl)benzoic acid (3n), HSQC (CD<sub>3</sub>OD)

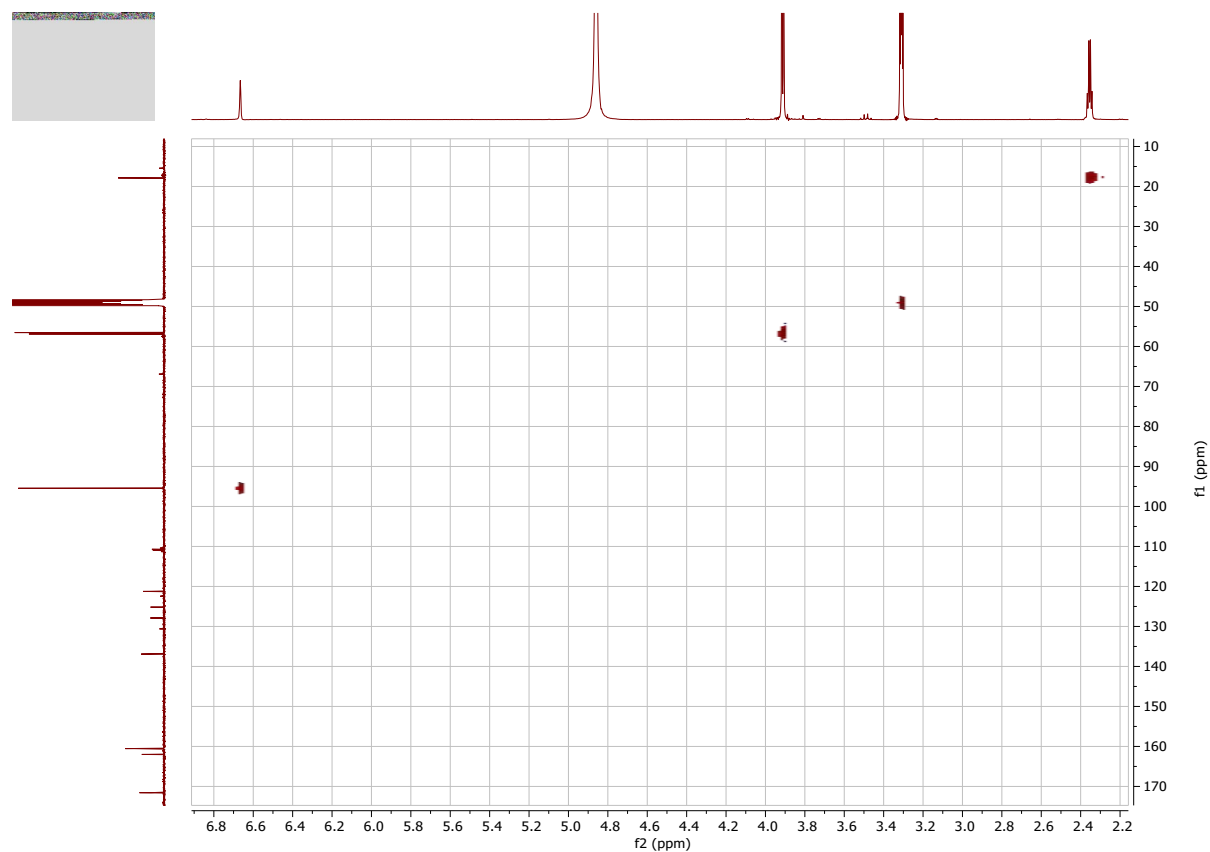

4,6-dimethoxy-2-methyl-3-(trifluoromethyl)benzoic acid (3n), HMBC (CD<sub>3</sub>OD)

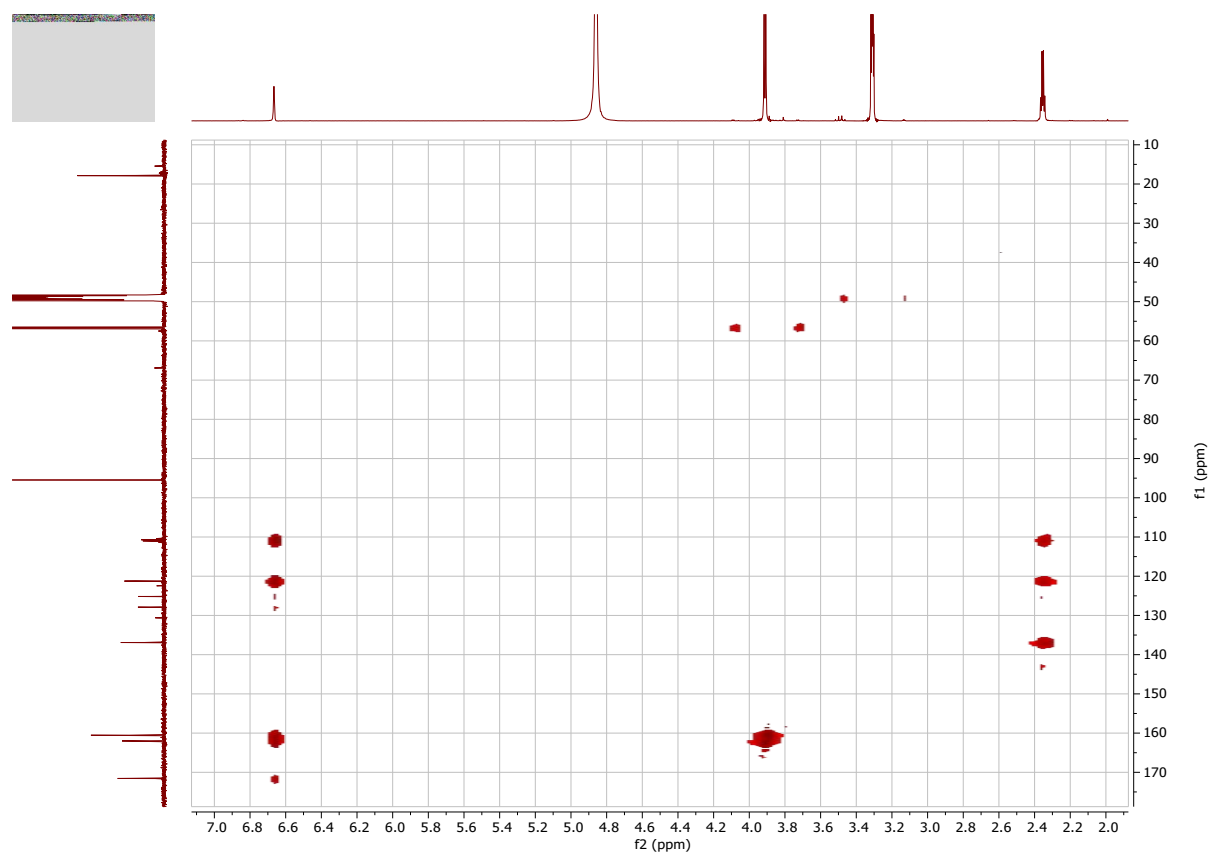

4,6-dimethoxy-2-methyl-3-(trifluoromethyl)benzoic acid (3n),  $^{19}\text{F}$  NMR (376 MHz,  $\text{CD}_3\text{OD}$ )

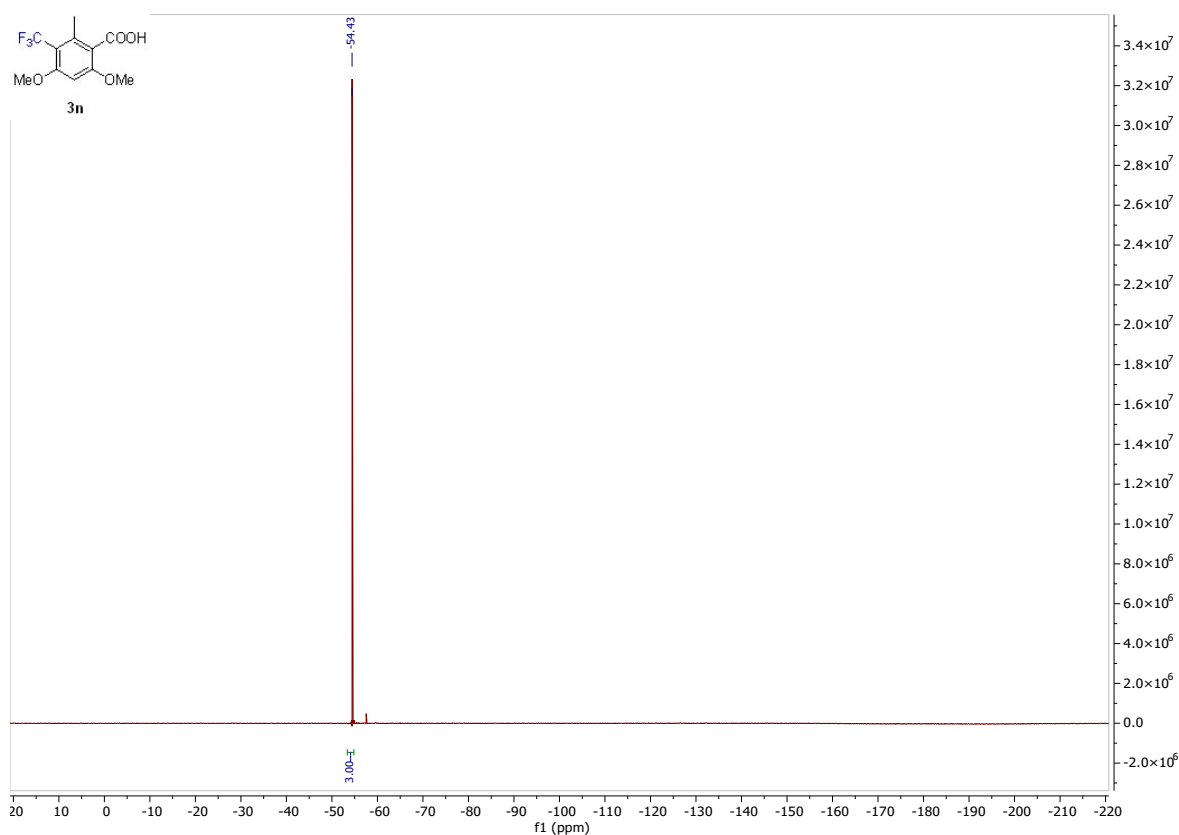

## References

1. E. O. Bortnikov, B. S. Smith, D. M. Volochnyuk and S. N. Semenov, *Chem. Eur. J.*, 2023, **29**, e202203825.
2. S. Seo, J. B. Taylor and M. F. Greaney, *ChemComm*, 2013, **49**, 6385-6387.
3. D. Wang, G.-J. Deng, S. Chen and H. Gong, *Green Chem.*, 2016, **18**, 5967-5970.
4. L. Li, X. Mu, W. Liu, Y. Wang, Z. Mi and C.-J. Li, *J. Am. Chem. Soc.*, 2016, **138**, 5809-5812.
5. Patent UNILEVER (PLC & NV) - US2014/0256830, 2014, A1.
6. Z. Huang, D. Zhang, X. Qi, Z. Yan, M. Wang, H. Yan and A. Lei, *Org. Lett.*, 2016, **18**, 2351-2354.
